# Supplementary material for: Synthesis of halogenated benzimidazolyl-C-nucleosides and their activity against Leishmania major and Leishmania tropica
Source: Royal Society of Chemistry journal article supplement (doi:10.1039/d4nj00035h), 2024-01-01
Supplement: d4nj00035h1.pdf [file d4nj00035h1.pdf]

## Synthesis of halogenated reverse position C-Nucleosides against *Leishmania major* and *Leishmania tropica*.

Umair Ahmed Khan,<sup>a</sup> M. Iqbal Chaudhary<sup>a,b</sup> and Sammer Yousuf<sup>\*a</sup>

<sup>a</sup> H. E. J. Research Institute of Chemistry, International Center for Chemical and Biological Sciences, University of Karachi, Karachi, Sindh-75270, Pakistan.

<sup>b</sup> Department of Biochemistry, Faculty of Science, King Abdulaziz University, Jeddah-21412, Saudi Arabia

|     |                                                                                                                                                                                                         |    |
|-----|---------------------------------------------------------------------------------------------------------------------------------------------------------------------------------------------------------|----|
| 1.  | 2-((3aR,5R,5aS,8aS,8bR)-2,2,7,7-tetramethyltetrahydro-5H-bis([1,3]dioxolo)[4,5-b:4',5'-d]pyran-5-yl)-1H-benzo[d]imidazole (3a) : .....                                                                  | 2  |
| •   | Spectral Analysis of (3a) .....                                                                                                                                                                         | 2  |
| •   | Single Crystal XRD of compound (3a) .....                                                                                                                                                               | 3  |
| •   | FAB +ve high- and low-resolution mass of (3a): .....                                                                                                                                                    | 6  |
| 2.  | 5,6-difluoro-2-((3aR,5R,5aS,8aS,8bR)-2,2,7,7-tetramethyltetrahydro-5H-bis([1,3]dioxolo)[4,5-b:4',5'-d]pyran-5-yl)-1H-benzo[d]imidazole (4a):                                                            | 7  |
| •   | Spectral Analysis of compound (4a) : .....                                                                                                                                                              | 7  |
| •   | Single Crystal XRD analysis of (4a) .....                                                                                                                                                               | 11 |
| 3.  | 5,6-dichloro-2-((3aR,5R,5aS,8aS,8bR)-2,2,7,7-tetramethyltetrahydro-5H-bis([1,3]dioxolo)[4,5-b:4',5'-d]pyran-5-yl)-1H-benzo[d]imidazole (5a):                                                            | 13 |
| •   | Spectral analysis of compound (5a) .....                                                                                                                                                                | 13 |
| •   | FAB +ve low- and high- resolution Mass spectrometry of compound (5a) : .....                                                                                                                            | 18 |
| 4.  | Spectral analysis of 5,6-dibromo-2-((3aR,5R,5aS,8aS,8bR)-2,2,7,7-tetramethyltetrahydro-5H-bis([1,3]dioxolo)[4,5-b:4',5'-d]pyran-5-yl)-1H-benzo[d]imidazole (6a): .....                                  | 19 |
| •   | FAB +ve low- and high- resolution Mass spectrometry of compound (6a) .....                                                                                                                              | 23 |
| 5.  | 5-bromo-2-((3aR,5R,5aS,8aS,8bR)-2,2,7,7-tetramethyltetrahydro-5H-bis([1,3]dioxolo)[4,5-b:4',5'-d]pyran-5-yl)-1H-benzo[d]imidazole (7a):                                                                 | 24 |
| •   | Mass spectrometry of compound (7a) .....                                                                                                                                                                | 25 |
| 6.  | 2-((3a'R,5'R,5a'S,8a'S,8b'R)-tetrahydro-5'H-dispiro[cyclohexane-1,2'-bis([1,3]dioxolo)[4,5-b:4',5'-d]pyran-7',1''-cyclohexan]-5'-yl)-1H-benzo[d]imidazole (3b) .....                                    | 26 |
| •   | FAB +ve low- and high- resolution Mass spectrometry of compound (3b) .....                                                                                                                              | 27 |
| 7.  | 5,6-difluoro-2-((3a'R,5'R,5a'S,8a'S,8b'R)-tetrahydro-5'H-dispiro[cyclohexane-1,2'-bis([1,3]dioxolo)[4,5-b:4',5'-d]pyran-7',1''-cyclohexan]-5'-yl)-1H-benzo[d]imidazole (4b) .....                       | 28 |
| •   | FAB +ve mood low and high resolution of compound 4b .....                                                                                                                                               | 31 |
| 8.  | 5,6-dichloro-2-((3a'R,5'R,5a'S,8a'S,8b'R)-tetrahydro-5'H-dispiro[cyclohexane-1,2'-bis([1,3]dioxolo)[4,5-b:4',5'-d]pyran-7',1''-cyclohexan]-5'-yl)-1H-benzo[d]imidazole (5b): .....                      | 32 |
| •   | Single crystal XRD analysis of compound 5a .....                                                                                                                                                        | 35 |
| 9.  | Spectral properties of 5,6-dibromo-2-((3a'R,5'R,5a'S,8a'S,8b'R)-tetrahydro-5'H-dispiro[cyclohexane-1,2'-bis([1,3]dioxolo)[4,5-b:4',5'-d]pyran-7',1''-cyclohexan]-5'-yl)-1H-benzo[d]imidazole (6b) ..... | 38 |
| •   | Single Crystal XRD analysis of compound 6b: .....                                                                                                                                                       | 43 |
| 10. | 5-bromo-2-((3a'R,5'R,5a'S,8a'S,8b'R)-tetrahydro-5'H-dispiro[cyclohexane-1,2'-bis([1,3]dioxolo)[4,5-b:4',5'-d]pyran-7',1''-cyclohexan]-5'-yl)-1H-benzo[d]imidazole (7b) : .....                          | 45 |
| •   | FAB +ve mood low and high resolution of compound 7b .....                                                                                                                                               | 46 |
| 11. | UPLC analysis of synthesized compounds .....                                                                                                                                                            | 47 |

1. 2-((3a*R*,5*R*,5a*S*,8a*S*,8b*R*)-2,2,7,7-tetramethyltetrahydro-5H-bis([1,3]dioxolo) [4,5-b:4',5'-d]pyran-5-yl)-1H-benzo[d]imidazole (**3a**) :

- Spectral Analysis of (**3a**)

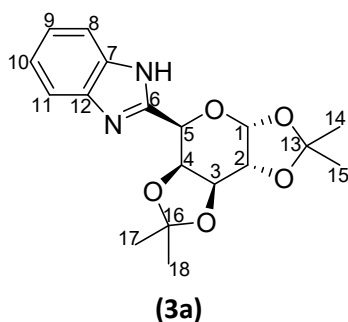

| S. No.                         | H <sup>1</sup> -NMR                    | Integration | J-value                                                                                          | C <sup>13</sup> -NMR                                   |
|--------------------------------|----------------------------------------|-------------|--------------------------------------------------------------------------------------------------|--------------------------------------------------------|
| <b>Galactose pyranose ring</b> |                                        |             |                                                                                                  |                                                        |
| 1                              | 5.655-5.645 ( <i>d</i> )               | 1           | 5 Hz ( <i>axial-equatorial</i> )                                                                 | -CH 96.5                                               |
| 2                              | 4.416-4.402 ( <i>dd</i> )              | 1           | $J_1 = 2\text{Hz}$ ( <i>di-equatorial</i> )<br>$J_2 = 4.85\text{Hz}$ ( <i>axial-equatorial</i> ) | -CH<br>66.1                                            |
| 3                              | 4.746-4.726 ( <i>dd</i> )              | 1           | $J_1 = 7.4\text{ Hz}$ ( <i>di-axial</i> )<br>$J_2 = 2\text{ Hz}$ ( <i>di-equatorial</i> )        | -CH<br>72.58                                           |
| 4                              | 4.705-4.685 ( <i>dd</i> )              | 1           | $J_1 = 7.85\text{ Hz}$ ( <i>di-axial</i> )<br>$J_2 = 2\text{Hz}$ ( <i>di-equatorial</i> )        | -CH<br>70.54                                           |
| 5                              | 5.216-5.213 ( <i>d</i> )               | 1           | $J = 1.5\text{ Hz}$ ( <i>di-equatorial</i> )                                                     | -CH<br>70.80                                           |
| <b>Benzimidazole</b>           |                                        |             |                                                                                                  |                                                        |
| 6                              | -                                      | -           | -                                                                                                | -C<br>152.43                                           |
| 7                              | -                                      | -           | -                                                                                                | -                                                      |
| 8-11                           | 7.591 (broad signal)                   | 4           | -                                                                                                | -                                                      |
| 12                             | -                                      | -           | -                                                                                                | -                                                      |
| <b>Iso-propyl acetyl group</b> |                                        |             |                                                                                                  |                                                        |
| 13                             | -                                      | -           | -                                                                                                | -C<br>109.42                                           |
| 14-15                          | 1.427 ( <i>s</i> ) - 1.353( <i>s</i> ) | 3 each      | -                                                                                                | -CH <sub>3</sub><br>26.01<br>-CH <sub>3</sub><br>24.88 |
| 16                             | -                                      | -           | -                                                                                                | -C<br>109.72                                           |
| 17-18                          | 1.547 ( <i>s</i> )- 1.300( <i>s</i> )  | 3 each      | -                                                                                                | -CH <sub>3</sub><br>26.2<br>-CH <sub>3</sub><br>24.07  |
| <b>Imidazole</b>               |                                        |             |                                                                                                  |                                                        |
| NH<br>(imidazole)              | 9.66 (rough broad)                     | 1           | -                                                                                                | -                                                      |

**Table S1:** H<sup>1</sup>NMR and C<sup>13</sup> NMR of compound (**3a**) along with *J*-values.

- Single Crystal XRD of compound (**3a**)

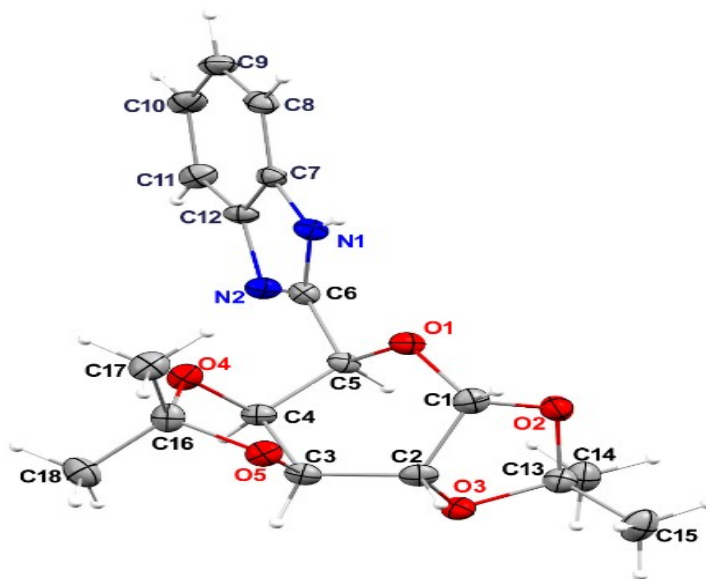

**Figure S1:** ORTEP view of compound (**3a**) at 24 % probability.

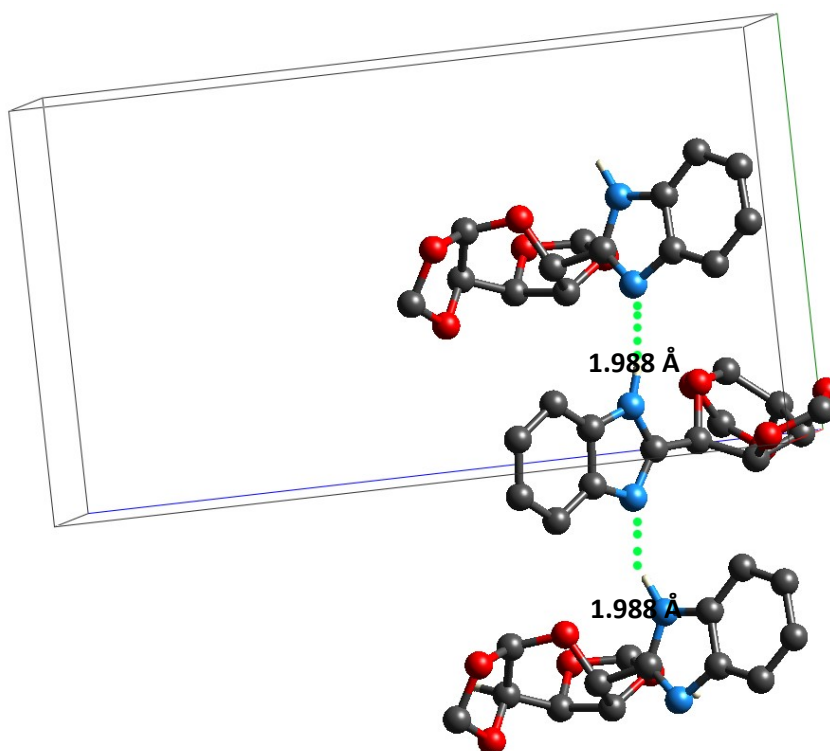

**Figure S2:** Hydrogen bonded imidazole ring in 1.988 Å along *a* of compound (**3a**) in a unit cell.

|                                   |                                                                |                 |
|-----------------------------------|----------------------------------------------------------------|-----------------|
| Identification code               | UKGALH_0ma                                                     |                 |
| Empirical formula                 | C <sub>36</sub> H <sub>44</sub> N <sub>4</sub> O <sub>10</sub> |                 |
| Formula weight                    | 692.75                                                         |                 |
| Temperature                       | 100(2) K                                                       |                 |
| Wavelength                        | 1.54178 Å                                                      |                 |
| Crystal system                    | Monoclinic                                                     |                 |
| Space group                       | P 21                                                           |                 |
| Unit cell dimensions              | a = 9.9303(7) Å                                                | α = 90°.        |
|                                   | b = 17.9109(12) Å                                              | β = 94.298(4)°. |
|                                   | c = 10.1057(7) Å                                               | γ = 90°.        |
| Volume                            | 1792.4(2) Å <sup>3</sup>                                       |                 |
| Z                                 | 2                                                              |                 |
| Density (calculated)              | 1.284 Mg/m <sup>3</sup>                                        |                 |
| Absorption coefficient            | 0.781 mm <sup>-1</sup>                                         |                 |
| F(000)                            | 736                                                            |                 |
| Crystal size                      | 0.110 x 0.100 x 0.030 mm <sup>3</sup>                          |                 |
| Theta range for data collection   | 4.387 to 68.288°.                                              |                 |
| Index ranges                      | -11 ≤ h ≤ 11, -21 ≤ k ≤ 21, -12 ≤ l ≤ 12                       |                 |
| Reflections collected             | 41507                                                          |                 |
| Independent reflections           | 6527 [R(int) = 0.0799]                                         |                 |
| Completeness to theta = 67.679°   | 99.9 %                                                         |                 |
| Absorption correction             | Semi-empirical from equivalents                                |                 |
| Max. and min. transmission        | 0.977 and 0.919                                                |                 |
| Refinement method                 | Full-matrix least-squares on F <sup>2</sup>                    |                 |
| Data / restraints / parameters    | 6527 / 1 / 464                                                 |                 |
| Goodness-of-fit on F <sup>2</sup> | 1.064                                                          |                 |
| Final R indices [I > 2σ(I)]       | R1 = 0.0374, wR2 = 0.0858                                      |                 |
| R indices (all data)              | R1 = 0.0443, wR2 = 0.0899                                      |                 |
| Absolute structure parameter      | 0.27(19)                                                       |                 |
| Extinction coefficient            | n/a                                                            |                 |
| Largest diff. peak and hole       | 0.179 and -0.249 e.Å <sup>-3</sup>                             |                 |
| CCDC                              | 2296171                                                        |                 |

**Table S2:** Description of single crystal XRD analysis of compound (**3a**).

- FAB +ve high- and low-resolution mass of (**3a**):

File: UKGALH-FABP

Date Run: 07-31-2023 (Time Run: 09:59:40)

Sample: UMAIR /PROF. DR. SAMMER

Instrument: JEOL-600H-2

Inlet: My Inlet

Ionization mode: FAB+

Run By: HEJ-MASS-LAB

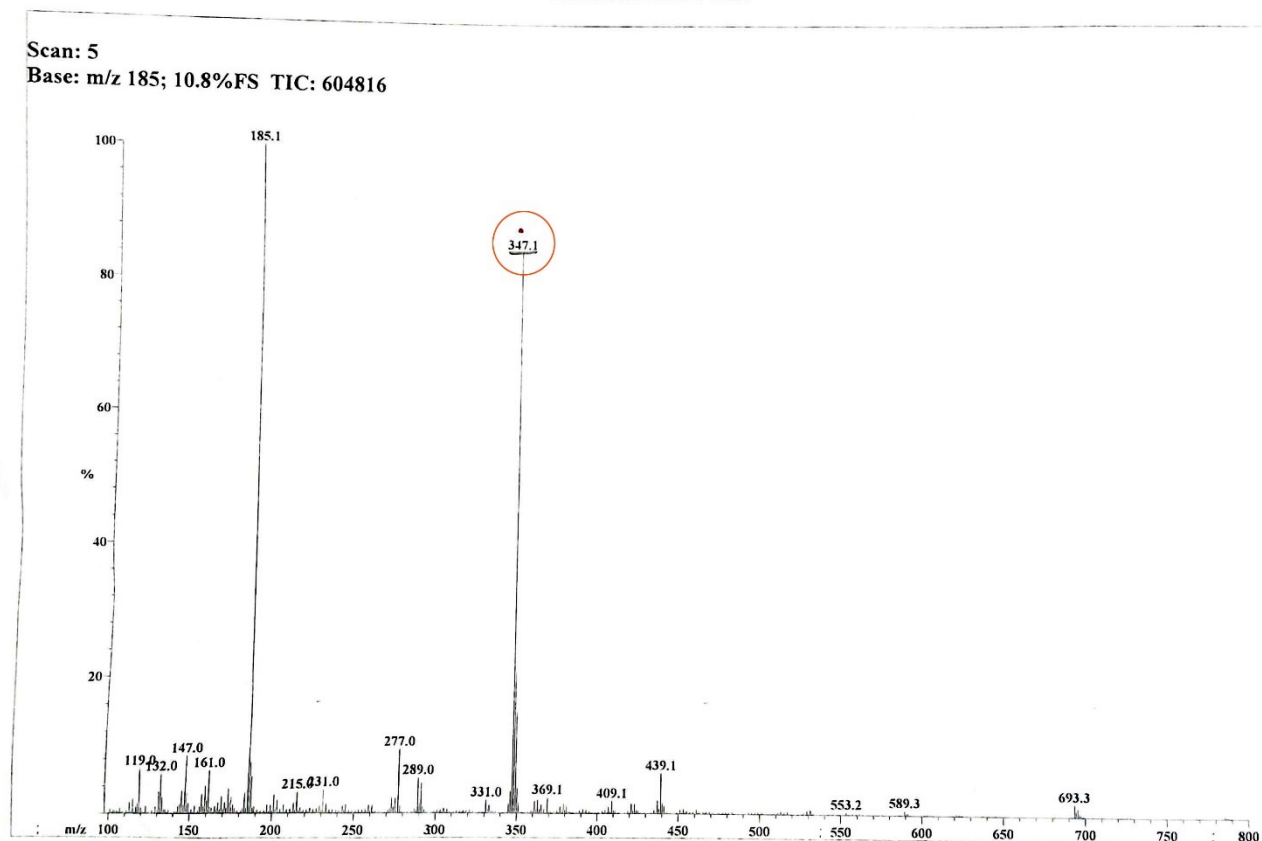

**Figure-S3:** Low resolution positive mode of FAB spectra of **3a**. Encircled is the  $m/z$  value 347.1.

High resolution FAB ( $m+1$ ) positive mode at JEOL HX 110 Mass spectrometer of compound **3a** is **347.1607**, while theoretical mass was **347.1624** which corresponds to the composition of **C<sub>18</sub>H<sub>23</sub>O<sub>5</sub>N<sub>2</sub>**.

2. 5,6-difluoro-2-((3*aR*,5*R*,5*aS*,8*aS*,8*bR*)-2,2,7,7-tetramethyltetrahydro-5H-bis([1,3]dioxolo)[4,5-*b*:4',5'-*d*]pyran-5-yl)-1H-benzo[d]imidazole (4a):

- Spectral Analysis of compound (4a) :

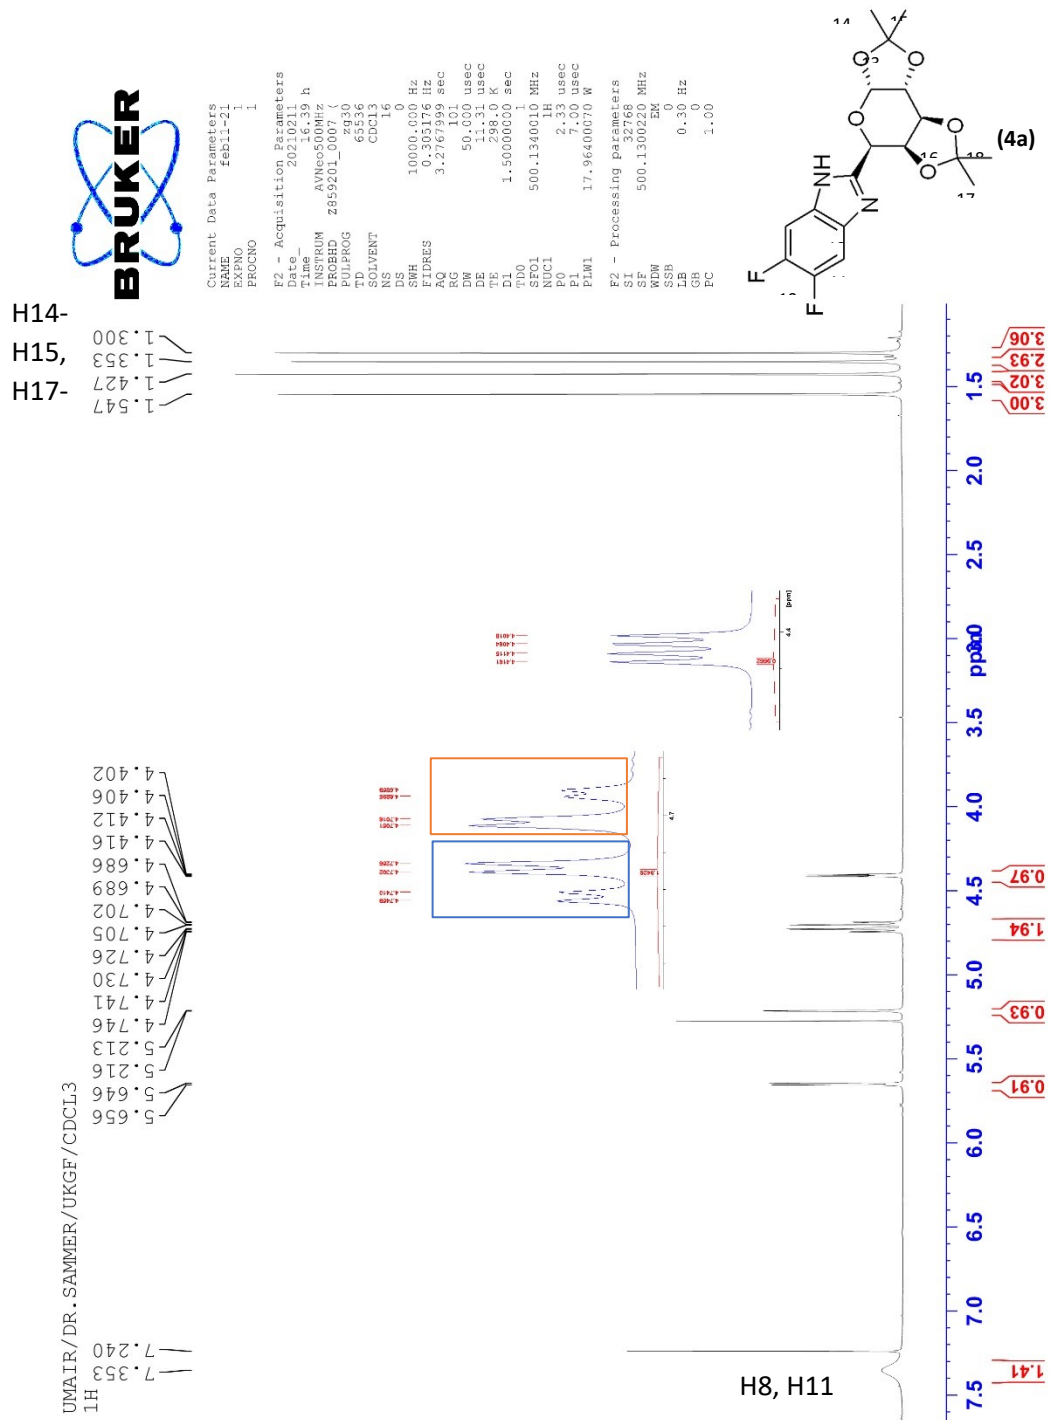

<sup>1</sup>H-NMR at 500MHz, in compound 5,6-difluoro-2-((3*aR*,5*R*,5*aS*,8*aS*,8*bR*)-2,2,7,7-tetrahydro-5H-bis([1,3]dioxolo)[4,5-*b*:4',5'-*d*]pyran-5-yl)-1H-benzo[d]imidazole (4a)

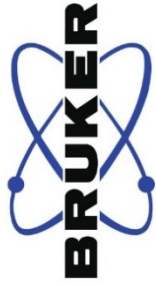

UMAIR/DR. SAMEER/UKGE/CDCL3

BB

152.43  
149.06  
148.94  
147.02

109.69  
109.42

72.58  
70.81  
70.52  
65.99

26.15  
25.94  
24.86  
23.96

Current Data Parameters  
NAME examld\_1H  
EXPNO 1  
PROCNO 1

F2 - Acquisition Parameters

Date\_ 20210209  
Time\_ 21.17 h  
INSTRUM AVNec\_500  
PROBHD Z8281\_0183\_(TX  
PULPROG zgpg  
TD 32768  
SOLVENT CDCL3  
NS 16384  
DS 4  
SWH 30120.482 Hz  
FIDRES 1.838408 Hz  
AQ 0.5439488 sec  
RG 101  
DW 16.600 usec  
DE 12.00 usec  
TE 298.0 K  
D1 2.00000000 sec  
D11 0.03000000 sec  
TD0 16  
SF01 125.7973986 MHz  
NUC1 13C  
P1 12.00 usec  
PLW1 229.03999329 W  
SF02 500.2320009 MHz  
NUC2 1H  
CPDPRG[2] waltz65  
PCPD2 80.00 usec  
PLW2 18.45899963 W  
PLW12 0.18459000 W  
PLW13 0.09284900 W

F2 - Processing parameters  
SI 16384  
SF 125.7829347 MHz  
EM  
SSB 0  
LB 1.00 Hz  
GB 0  
PC 1.40

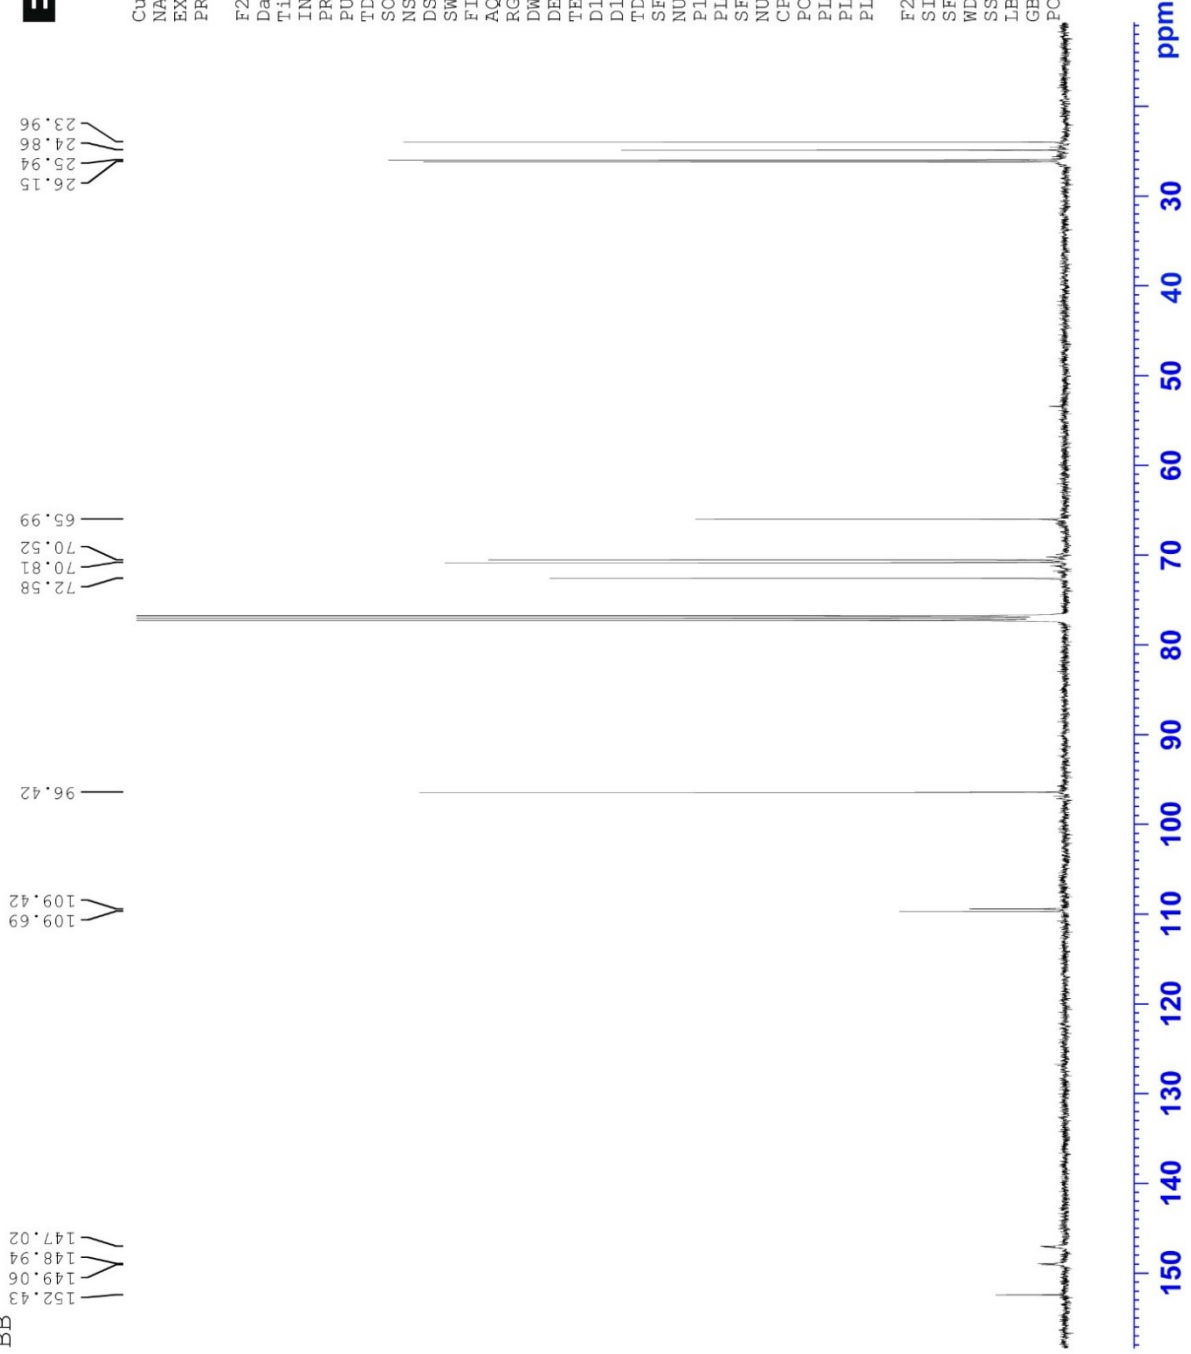

500MHz, in  
-difluoro-2-  
2,2,7,7-  
I-  
,5'-d]pyran-  
ole (4a)

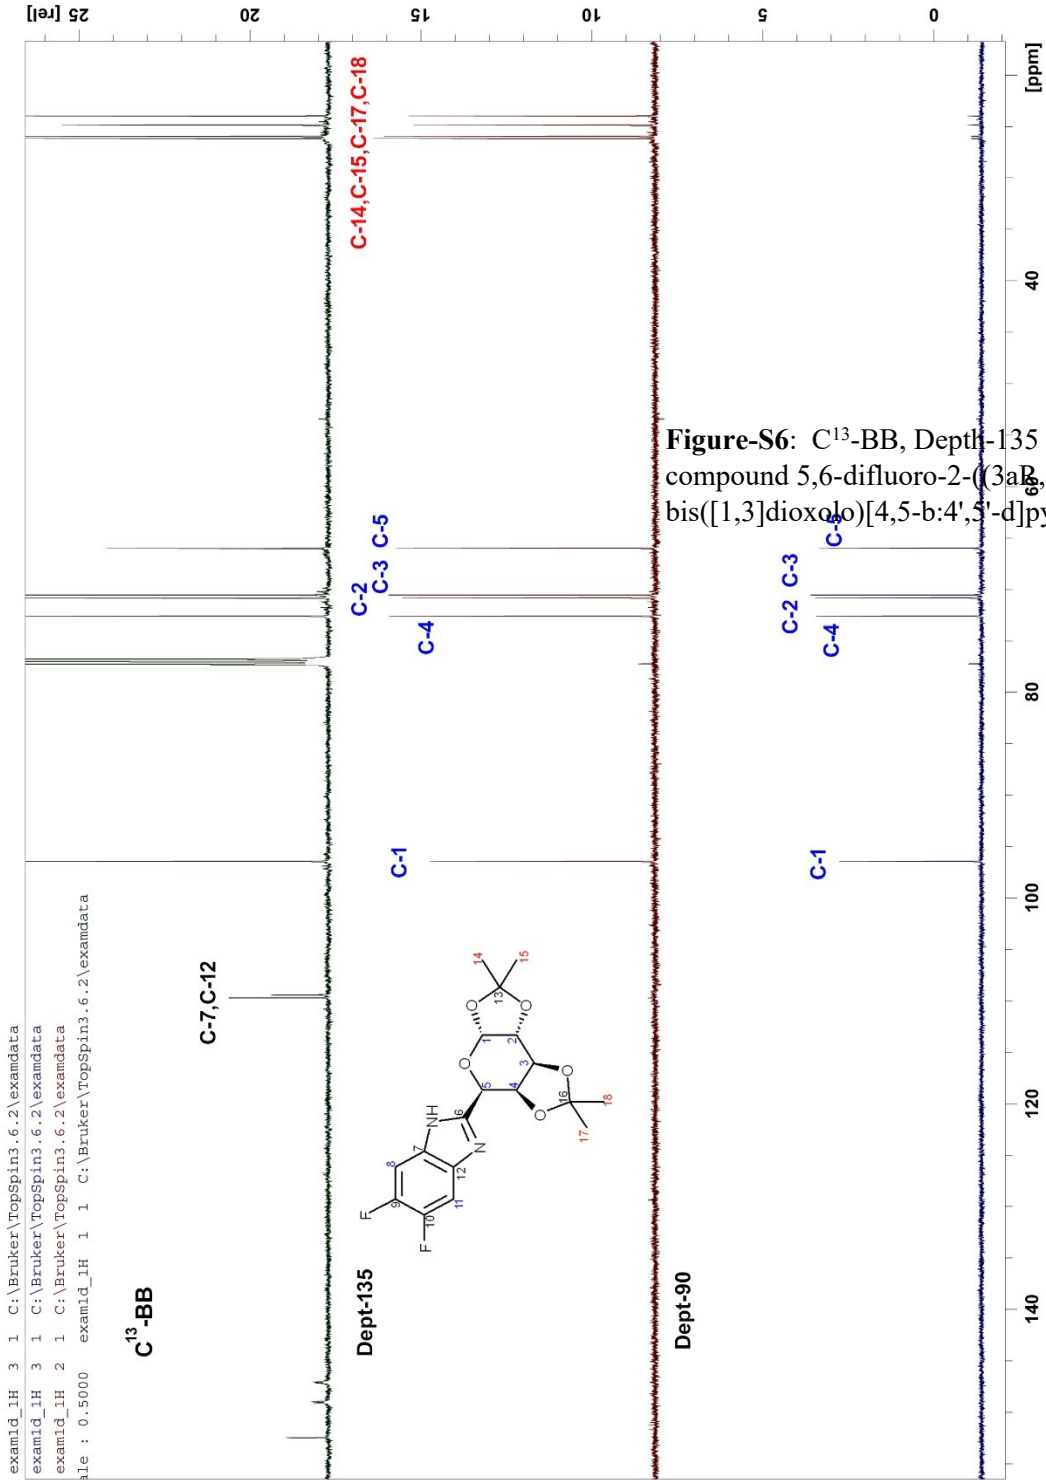

**Figure-S6:** C<sup>13</sup>-BB, Dept-135 and Dept-90 NMR at 500MHz of compound 5,6-difluoro-2-((3aR,5R,5aS,8aS,8bR)-2,2,7,7-tetrahydrobis[1,3]dioxolo[4,5-b':4',5'-d]pyran-5-yl)-1H-benzo[d]imidazole



```

Experiment Data Parameters
NAME          20220213
EXPNO         3
PROCNO        1

F2 - Acquisition Parameters
Date_         20220213
Time          20:23:43
INSTRUM       spect
PROBHD        5mmQNP1H
PULPROG       zgpg30
TD            1024
SOLVENT       CDCl3
DS            8
AQ            0.0870400 sec
RG            85.100
RG2           85.100
DE            6.250 usec
TE            298.2 K
D0            1.45000000 sec
D1            0.00000000 sec
D2            1.50000000 sec
D3            0.00000000 sec
D4            0.00000000 sec
D5            0.00000000 sec
D6            0.00000000 sec
D7            0.00000000 sec
D8            0.00000000 sec
D9            0.00000000 sec
D10           0.00000000 sec
D11           0.00000000 sec
D12           0.00000000 sec
D13           0.00000000 sec
D14           0.00000000 sec
D15           0.00000000 sec
D16           0.00000000 sec
D17           0.00000000 sec
D18           0.00000000 sec
D19           0.00000000 sec
D20           0.00000000 sec
D21           0.00000000 sec
D22           0.00000000 sec
D23           0.00000000 sec
D24           0.00000000 sec
D25           0.00000000 sec
D26           0.00000000 sec
D27           0.00000000 sec
D28           0.00000000 sec
D29           0.00000000 sec
D30           0.00000000 sec
D31           0.00000000 sec
D32           0.00000000 sec
D33           0.00000000 sec
D34           0.00000000 sec
D35           0.00000000 sec
D36           0.00000000 sec
D37           0.00000000 sec
D38           0.00000000 sec
D39           0.00000000 sec
D40           0.00000000 sec
D41           0.00000000 sec
D42           0.00000000 sec
D43           0.00000000 sec
D44           0.00000000 sec
D45           0.00000000 sec
D46           0.00000000 sec
D47           0.00000000 sec
D48           0.00000000 sec
D49           0.00000000 sec
D50           0.00000000 sec
D51           0.00000000 sec
D52           0.00000000 sec
D53           0.00000000 sec
D54           0.00000000 sec
D55           0.00000000 sec
D56           0.00000000 sec
D57           0.00000000 sec
D58           0.00000000 sec
D59           0.00000000 sec
D60           0.00000000 sec
D61           0.00000000 sec
D62           0.00000000 sec
D63           0.00000000 sec
D64           0.00000000 sec
D65           0.00000000 sec
D66           0.00000000 sec
D67           0.00000000 sec
D68           0.00000000 sec
D69           0.00000000 sec
D70           0.00000000 sec
D71           0.00000000 sec
D72           0.00000000 sec
D73           0.00000000 sec
D74           0.00000000 sec
D75           0.00000000 sec
D76           0.00000000 sec
D77           0.00000000 sec
D78           0.00000000 sec
D79           0.00000000 sec
D80           0.00000000 sec
D81           0.00000000 sec
D82           0.00000000 sec
D83           0.00000000 sec
D84           0.00000000 sec
D85           0.00000000 sec
D86           0.00000000 sec
D87           0.00000000 sec
D88           0.00000000 sec
D89           0.00000000 sec
D90           0.00000000 sec
D91           0.00000000 sec
D92           0.00000000 sec
D93           0.00000000 sec
D94           0.00000000 sec
D95           0.00000000 sec
D96           0.00000000 sec
D97           0.00000000 sec
D98           0.00000000 sec
D99           0.00000000 sec
D100          0.00000000 sec

ZCPROG        zgpg30
SFO1          500.1330000 MHz
NUC1          13C
P1            7.00 usec
P2            14.00 usec
SFO2          125.7688522 MHz
NUC2          1H
P3            15.00 usec
SFO3          400.1455000 MHz
NUC3          1H
P4            15.00 usec
SFO4          125.7688522 MHz
NUC4          13C
P5            15.00 usec
SFO5          119.4000153 MHz
NUC5          19F
P6            15.00 usec
SFO6          400.1455000 MHz
NUC6          1H
P7            15.00 usec
SFO7          125.7688522 MHz
NUC7          13C
P8            15.00 usec
SFO8          119.4000153 MHz
NUC8          19F
P9            15.00 usec
SFO9          125.7688522 MHz
NUC9          13C
P10           15.00 usec
SFO10         125.7688522 MHz
NUC10         13C
P11           15.00 usec
SFO11         125.7688522 MHz
NUC11         13C
P12           15.00 usec
SFO12         125.7688522 MHz
NUC12         13C
P13           15.00 usec
SFO13         125.7688522 MHz
NUC13         13C
P14           15.00 usec
SFO14         125.7688522 MHz
NUC14         13C
P15           15.00 usec
SFO15         125.7688522 MHz
NUC15         13C
P16           15.00 usec
SFO16         125.7688522 MHz
NUC16         13C
P17           15.00 usec
SFO17         125.7688522 MHz
NUC17         13C
P18           15.00 usec
SFO18         125.7688522 MHz
NUC18         13C
P19           15.00 usec
SFO19         125.7688522 MHz
NUC19         13C
P20           15.00 usec
SFO20         125.7688522 MHz
NUC20         13C
P21           15.00 usec
SFO21         125.7688522 MHz
NUC21         13C
P22           15.00 usec
SFO22         125.7688522 MHz
NUC22         13C
P23           15.00 usec
SFO23         125.7688522 MHz
NUC23         13C
P24           15.00 usec
SFO24         125.7688522 MHz
NUC24         13C
P25           15.00 usec
SFO25         125.7688522 MHz
NUC25         13C
P26           15.00 usec
SFO26         125.7688522 MHz
NUC26         13C
P27           15.00 usec
SFO27         125.7688522 MHz
NUC27         13C
P28           15.00 usec
SFO28         125.7688522 MHz
NUC28         13C
P29           15.00 usec
SFO29         125.7688522 MHz
NUC29         13C
P30           15.00 usec
SFO30         125.7688522 MHz
NUC30         13C
P31           15.00 usec
SFO31         125.7688522 MHz
NUC31         13C
P32           15.00 usec
SFO32         125.7688522 MHz
NUC32         13C
P33           15.00 usec
SFO33         125.7688522 MHz
NUC33         13C
P34           15.00 usec
SFO34         125.7688522 MHz
NUC34         13C
P35           15.00 usec
SFO35         125.7688522 MHz
NUC35         13C
P36           15.00 usec
SFO36         125.7688522 MHz
NUC36         13C
P37           15.00 usec
SFO37         125.7688522 MHz
NUC37         13C
P38           15.00 usec
SFO38         125.7688522 MHz
NUC38         13C
P39           15.00 usec
SFO39         125.7688522 MHz
NUC39         13C
P40           15.00 usec
SFO40         125.7688522 MHz
NUC40         13C
P41           15.00 usec
SFO41         125.7688522 MHz
NUC41         13C
P42           15.00 usec
SFO42         125.7688522 MHz
NUC42         13C
P43           15.00 usec
SFO43         125.7688522 MHz
NUC43         13C
P44           15.00 usec
SFO44         125.7688522 MHz
NUC44         13C
P45           15.00 usec
SFO45         125.7688522 MHz
NUC45         13C
P46           15.00 usec
SFO46         125.7688522 MHz
NUC46         13C
P47           15.00 usec
SFO47         125.7688522 MHz
NUC47         13C
P48           15.00 usec
SFO48         125.7688522 MHz
NUC48         13C
P49           15.00 usec
SFO49         125.7688522 MHz
NUC49         13C
P50           15.00 usec
SFO50         125.7688522 MHz
NUC50         13C
P51           15.00 usec
SFO51         125.7688522 MHz
NUC51         13C
P52           15.00 usec
SFO52         125.7688522 MHz
NUC52         13C
P53           15.00 usec
SFO53         125.7688522 MHz
NUC53         13C
P54           15.00 usec
SFO54         125.7688522 MHz
NUC54         13C
P55           15.00 usec
SFO55         125.7688522 MHz
NUC55         13C
P56           15.00 usec
SFO56         125.7688522 MHz
NUC56         13C
P57           15.00 usec
SFO57         125.7688522 MHz
NUC57         13C
P58           15.00 usec
SFO58         125.7688522 MHz
NUC58         13C
P59           15.00 usec
SFO59         125.7688522 MHz
NUC59         13C
P60           15.00 usec
SFO60         125.7688522 MHz
NUC60         13C
P61           15.00 usec
SFO61         125.7688522 MHz
NUC61         13C
P62           15.00 usec
SFO62         125.7688522 MHz
NUC62         13C
P63           15.00 usec
SFO63         125.7688522 MHz
NUC63         13C
P64           15.00 usec
SFO64         125.7688522 MHz
NUC64         13C
P65           15.00 usec
SFO65         125.7688522 MHz
NUC65         13C
P66           15.00 usec
SFO66         125.7688522 MHz
NUC66         13C
P67           15.00 usec
SFO67         125.7688522 MHz
NUC67         13C
P68           15.00 usec
SFO68         125.7688522 MHz
NUC68         13C
P69           15.00 usec
SFO69         125.7688522 MHz
NUC69         13C
P70           15.00 usec
SFO70         125.7688522 MHz
NUC70         13C
P71           15.00 usec
SFO71         125.7688522 MHz
NUC71         13C
P72           15.00 usec
SFO72         125.7688522 MHz
NUC72         13C
P73           15.00 usec
SFO73         125.7688522 MHz
NUC73         13C
P74           15.00 usec
SFO74         125.7688522 MHz
NUC74         13C
P75           15.00 usec
SFO75         125.7688522 MHz
NUC75         13C
P76           15.00 usec
SFO76         125.7688522 MHz
NUC76         13C
P77           15.00 usec
SFO77         125.7688522 MHz
NUC77         13C
P78           15.00 usec
SFO78         125.7688522 MHz
NUC78         13C
P79           15.00 usec
SFO79         125.7688522 MHz
NUC79         13C
P80           15.00 usec
SFO80         125.7688522 MHz
NUC80         13C
P81           15.00 usec
SFO81         125.7688522 MHz
NUC81         13C
P82           15.00 usec
SFO82         125.7688522 MHz
NUC82         13C
P83           15.00 usec
SFO83         125.7688522 MHz
NUC83         13C
P84           15.00 usec
SFO84         125.7688522 MHz
NUC84         13C
P85           15.00 usec
SFO85         125.7688522 MHz
NUC85         13C
P86           15.00 usec
SFO86         125.7688522 MHz
NUC86         13C
P87           15.00 usec
SFO87         125.7688522 MHz
NUC87         13C
P88           15.00 usec
SFO88         125.7688522 MHz
NUC88         13C
P89           15.00 usec
SFO89         125.7688522 MHz
NUC89         13C
P90           15.00 usec
SFO90         125.7688522 MHz
NUC90         13C
P91           15.00 usec
SFO91         125.7688522 MHz
NUC91         13C
P92           15.00 usec
SFO92         125.7688522 MHz
NUC92         13C
P93           15.00 usec
SFO93         125.7688522 MHz
NUC93         13C
P94           15.00 usec
SFO94         125.7688522 MHz
NUC94         13C
P95           15.00 usec
SFO95         125.7688522 MHz
NUC95         13C
P96           15.00 usec
SFO96         125.7688522 MHz
NUC96         13C
P97           15.00 usec
SFO97         125.7688522 MHz
NUC97         13C
P98           15.00 usec
SFO98         125.7688522 MHz
NUC98         13C
P99           15.00 usec
SFO99         125.7688522 MHz
NUC99         13C
P100          15.00 usec
SFO100        125.7688522 MHz
NUC100        13C

```

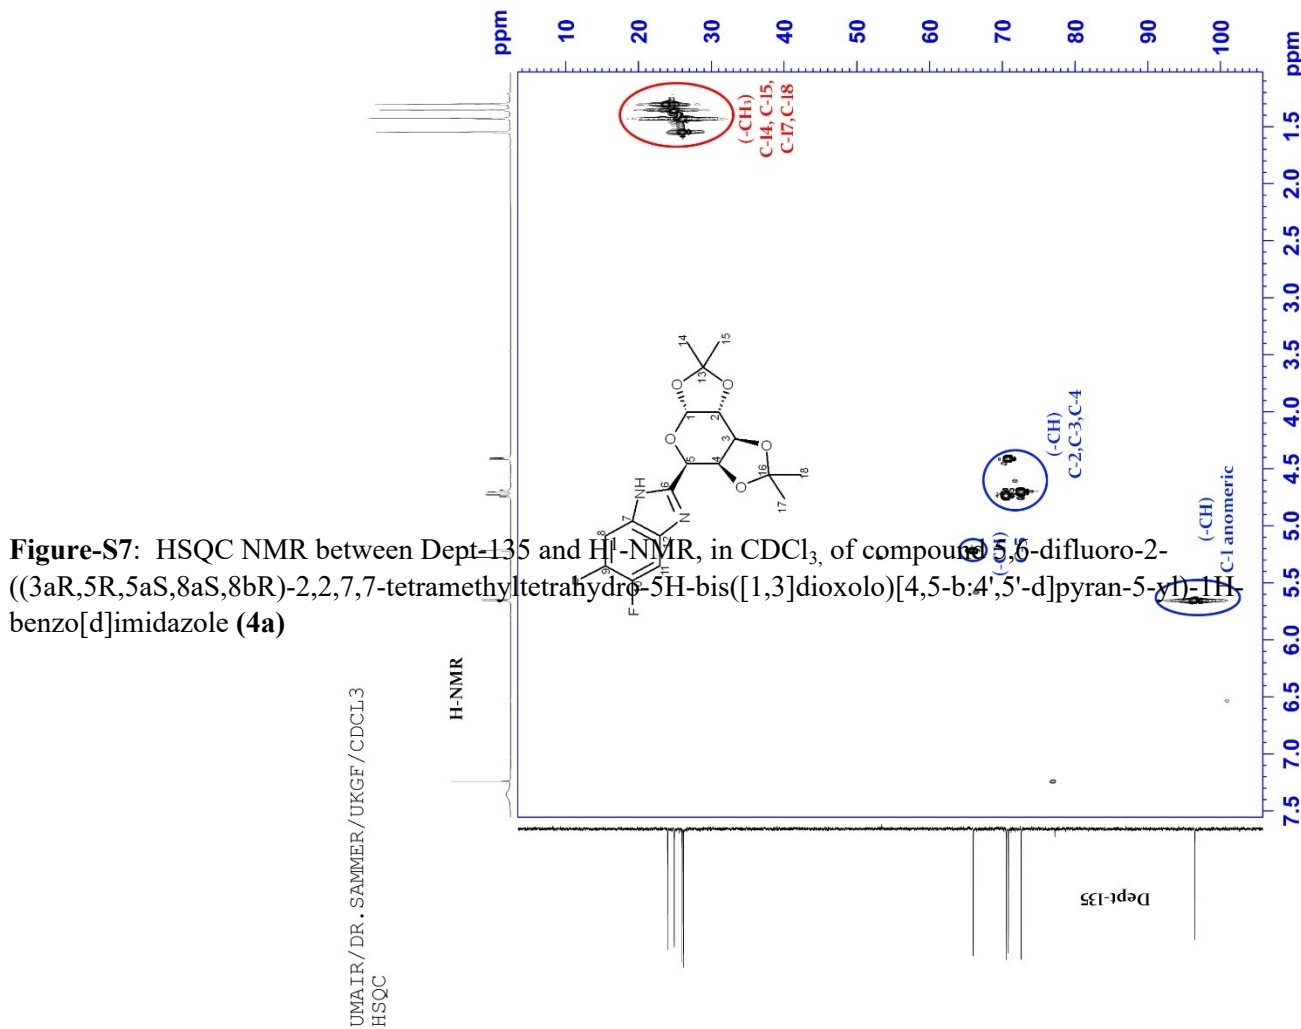

**Figure-S7:** HSQC NMR between Dept-135 and <sup>1</sup>H-NMR, in CDCl<sub>3</sub>, of compound 5,6-difluoro-2-((3aR,5R,5aS,8aS,8bR)-2,2,7,7-tetramethyltetrahydro-5H-bis([1,3]dioxolo)[4,5-b:4',5'-d]pyran-5-yl)-1H-benzo[d]imidazole (**4a**)

- Single Crystal XRD analysis of (**4a**)

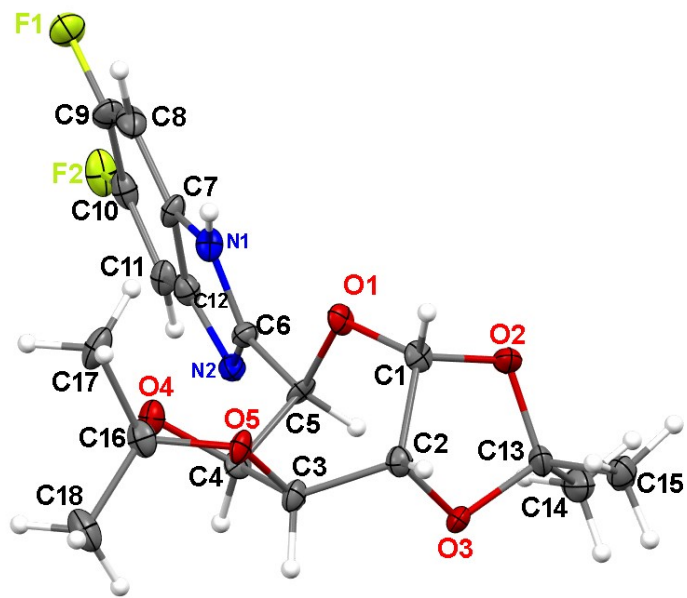

Figure-S7: ORTEP view of the compound (4a) at 40% probability.

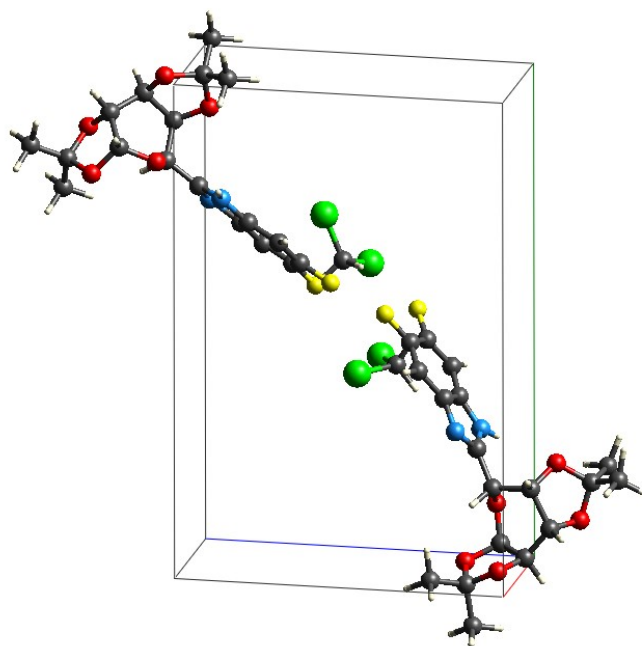

Figure S8: Crystal packing of compound (4a) in a unit cell, with two DCM molecules in unit cell.

|                                   |                                                                                              |                  |
|-----------------------------------|----------------------------------------------------------------------------------------------|------------------|
| Identification code               | <b>4a</b>                                                                                    |                  |
| Empirical formula                 | C <sub>19</sub> H <sub>22</sub> C <sub>12</sub> F <sub>2</sub> N <sub>2</sub> O <sub>5</sub> |                  |
| Formula weight                    | 467.28                                                                                       |                  |
| Temperature                       | 100(2) K                                                                                     |                  |
| Wavelength                        | 1.54178 Å                                                                                    |                  |
| Crystal system                    | Monoclinic                                                                                   |                  |
| Space group                       | P 21                                                                                         |                  |
| Unit cell dimensions              | a = 10.0713(12) Å                                                                            | α = 90°.         |
|                                   | b = 17.542(2) Å                                                                              | β = 106.352(7)°. |
|                                   | c = 12.5246(15) Å                                                                            | γ = 90°.         |
| Volume                            | 2123.2(4) Å <sup>3</sup>                                                                     |                  |
| Z                                 | 4                                                                                            |                  |
| Density (calculated)              | 1.462 Mg/m <sup>3</sup>                                                                      |                  |
| Absorption coefficient            | 3.215 mm <sup>-1</sup>                                                                       |                  |
| F(000)                            | 968                                                                                          |                  |
| Crystal size                      | 0.310 x 0.310 x 0.024 mm <sup>3</sup>                                                        |                  |
| Theta range for data collection   | 3.678 to 68.288°.                                                                            |                  |
| Index ranges                      | -12 ≤ h ≤ 12, -21 ≤ k ≤ 21, -15 ≤ l ≤ 15                                                     |                  |
| Reflections collected             | 40977                                                                                        |                  |
| Independent reflections           | 7405 [R(int) = 0.1428]                                                                       |                  |
| Completeness to theta = 67.679°   | 99.6 %                                                                                       |                  |
| Refinement method                 | Full-matrix least-squares on F <sup>2</sup>                                                  |                  |
| Data / restraints / parameters    | 7405 / 1 / 550                                                                               |                  |
| Goodness-of-fit on F <sup>2</sup> | 1.053                                                                                        |                  |
| Final R indices [I > 2σ(I)]       | R1 = 0.0825, wR2 = 0.1923                                                                    |                  |
| R indices (all data)              | R1 = 0.1147, wR2 = 0.2122                                                                    |                  |
| Absolute structure parameter      | 0.128(14)                                                                                    |                  |
| Extinction coefficient            | 0.0050(7)                                                                                    |                  |
| Largest diff. peak and hole       | 1.299 and -0.975 e.Å <sup>-3</sup>                                                           |                  |
| CCDC                              | 2300614                                                                                      |                  |

**Table S3:** Crystal packing of compound (**4a**) in a unit cell, with two DCM molecules in unit cell.

3. 5,6-dichloro-  
bis([1,3  
Spectra

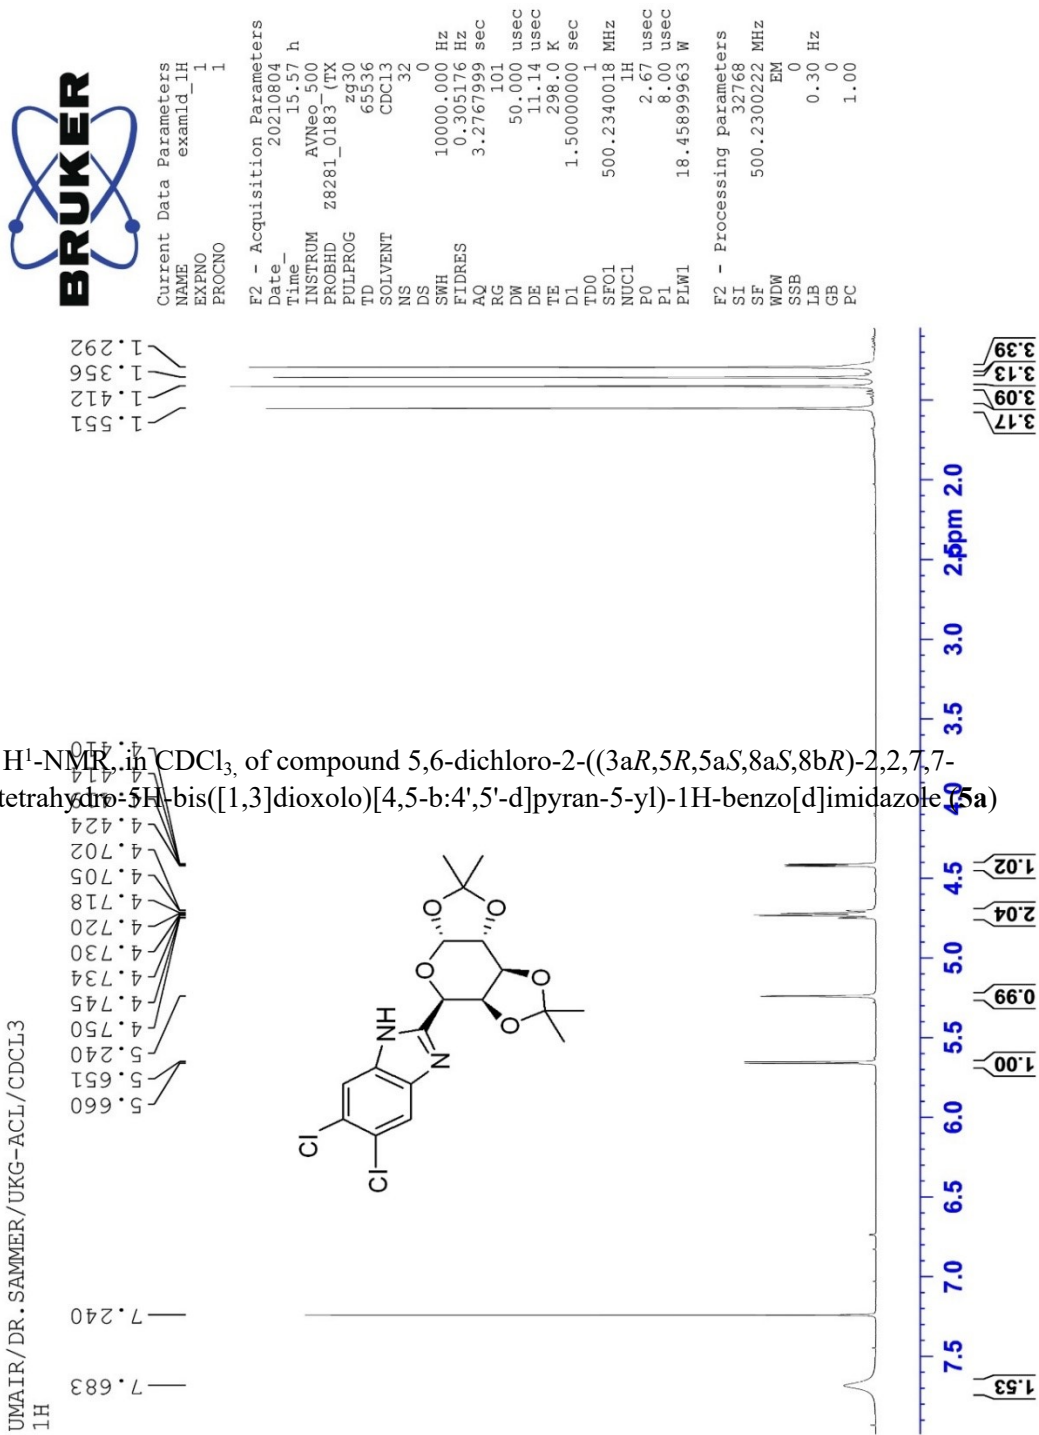

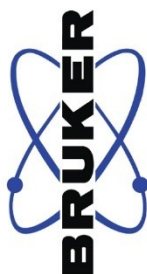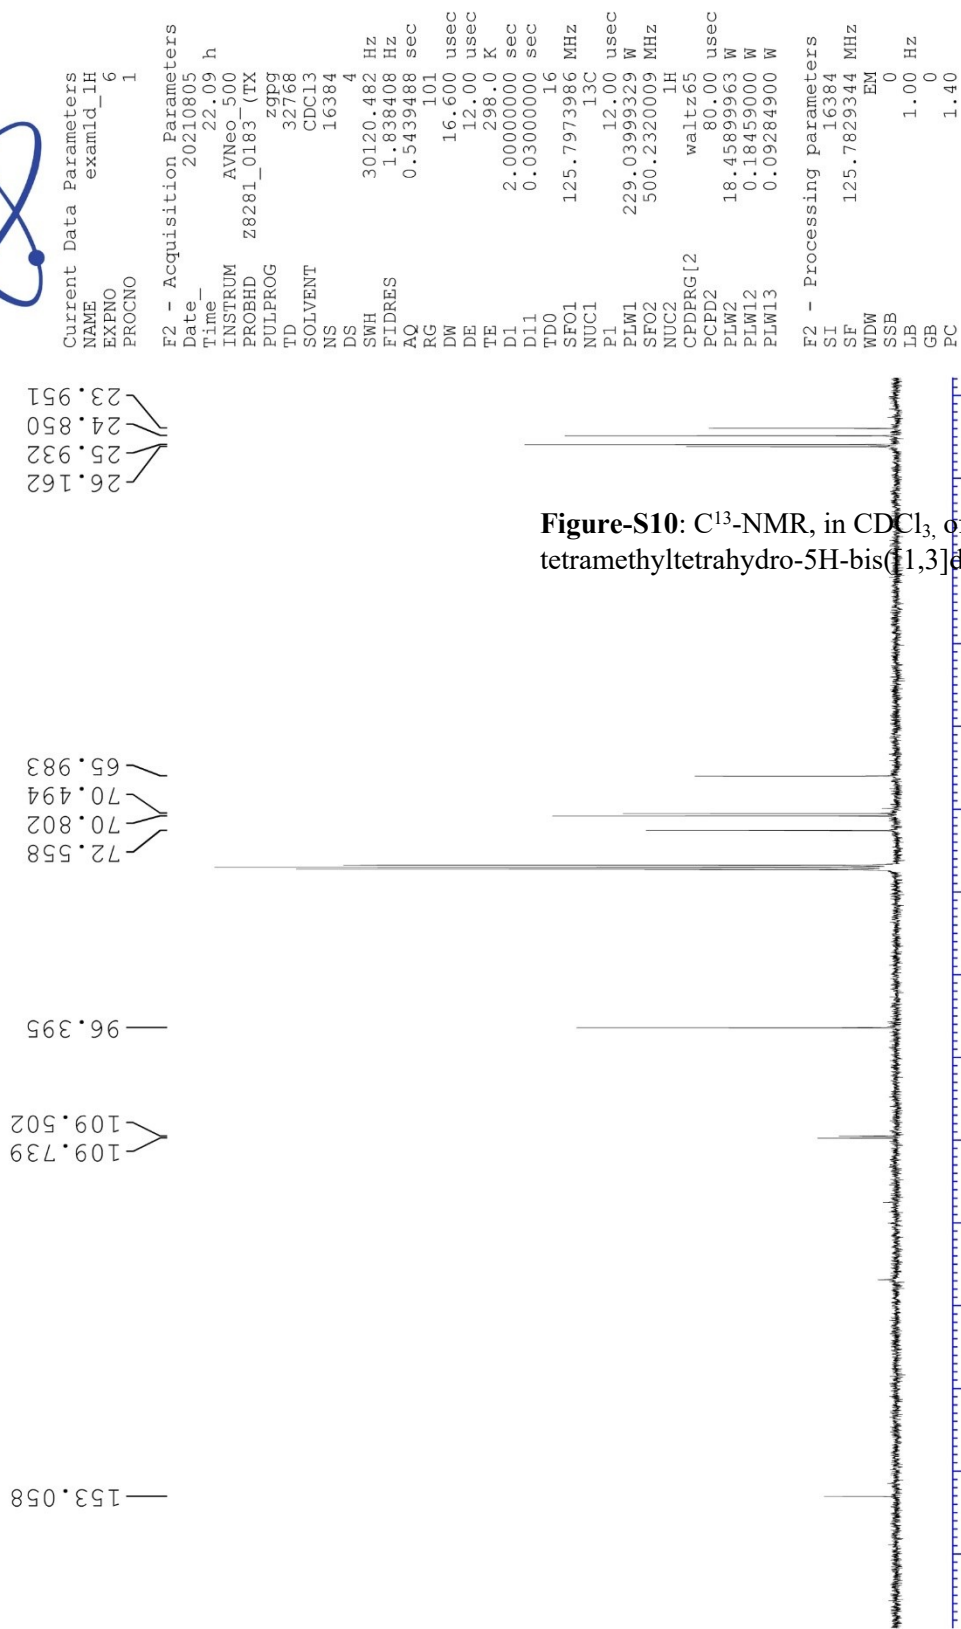

**Figure-S10:**  $C^{13}$ -NMR, in  $CDCl_3$ , of compound 5,6-dichloro-2-(tetramethyltetrahydro-5H-bis(1,3)dioxolo)[4,5-b:4',5'-d]pyran-5-ylidene

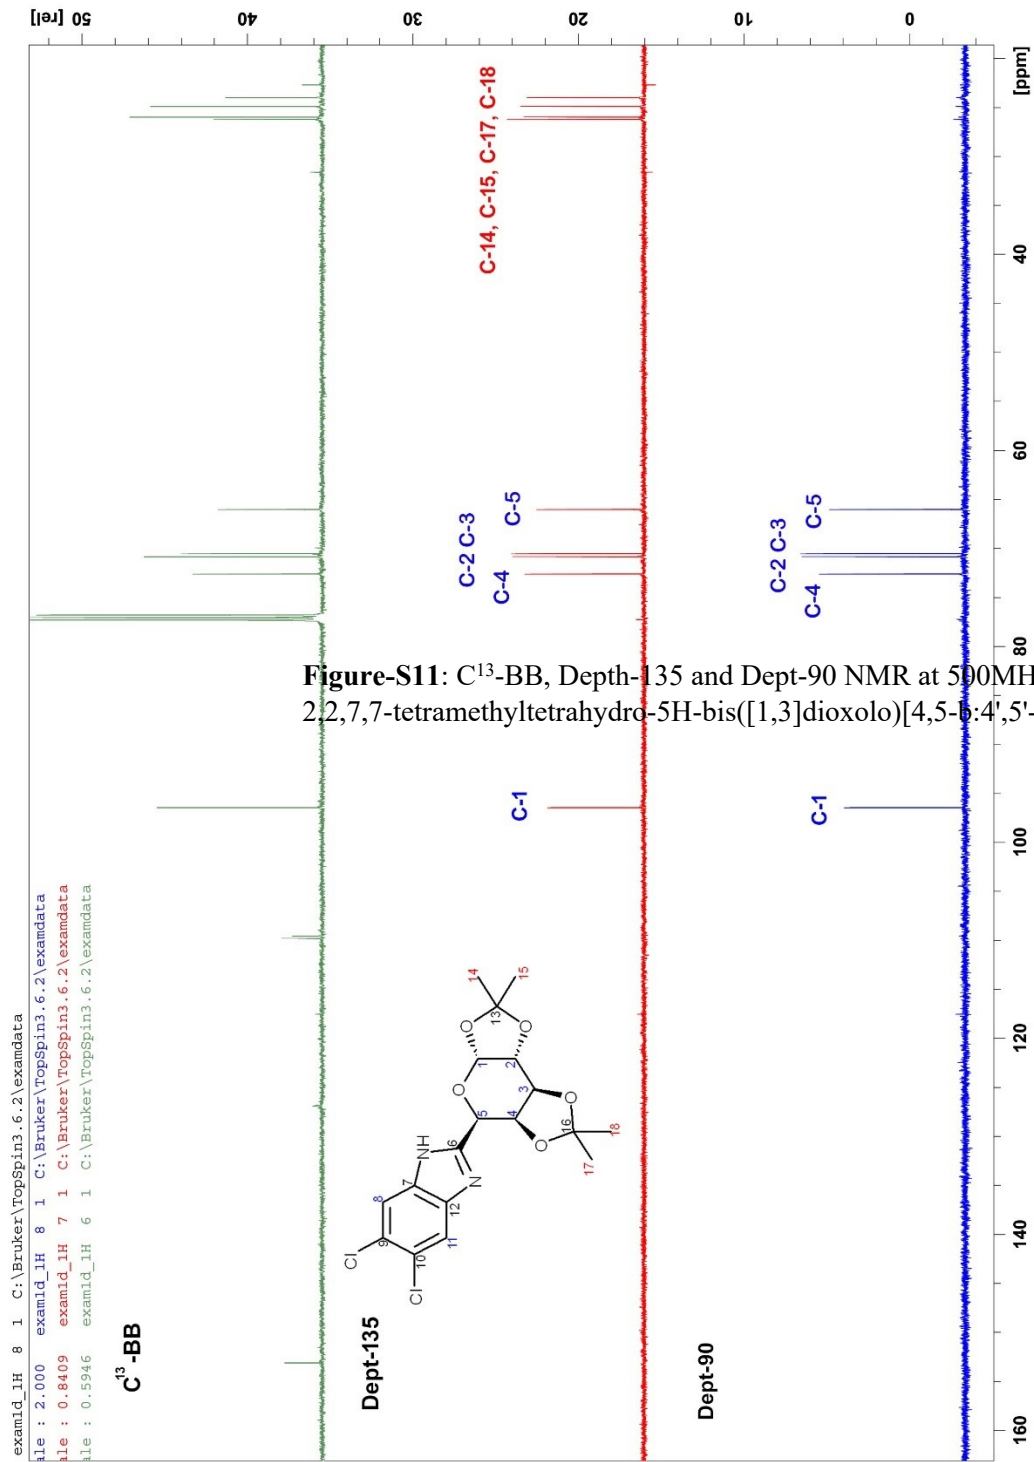

**Figure-S11:** C<sup>13</sup>-BB, Dept-135 and Dept-90 NMR at 500MHz 5,6-dichloro-2,2,7,7-tetramethyltetrahydro-5H-bis([1,3]dioxolo)[4,5-b:4',5'-d]pyran-5

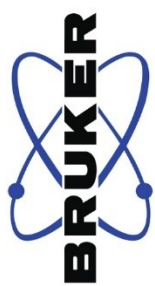

Current Data Parameters  
 NAME examld\_1h  
 EXPNO 2  
 PROCNO 1

F2 - Acquisition Parameters  
 Date\_ 20210804  
 Time\_ 17.02 h  
 INSTRUM AVNeo\_500  
 PROBHD zgpg30 (TX)  
 PULPROG zgpg30  
 TD 2048  
 SOLVENT CDCl3  
 NS 8  
 DS 8  
 SWH 5882.353 Hz  
 FIDRES 5.744485 Hz  
 AQ 0.1740800 sec  
 RG 101  
 DW 85.000 usec  
 DE 6.50 usec  
 TE 298.0 K  
 D0 0.00000300 sec  
 D1 1.50000000 sec  
 D13 0.00000400 sec  
 D16 0.00020000 sec  
 INO 0.00017000 sec  
 TDel 1  
 SFO1 500.2330014 MHz  
 NUC1 1H  
 P0 8.00 usec  
 P1 8.00 usec  
 PLW1 18.4589963 W  
 GPNAM[1] SMSQ10.100  
 GPZ1 10.00 %  
 F16 1000.00 usec

F1 - Acquisition parameters  
 TD 256  
 SFO1 500.233 MHz  
 FIDRES 45.955883 Hz  
 SW 11.759 ppm  
 FnmODE QF

F2 - Processing parameters  
 SI 1024  
 SF 500.2300222 MHz  
 WDW QNONE  
 SSB 0  
 LB 0 Hz  
 GB 0  
 FC 1.40

F1 - Processing parameters  
 SI 1024  
 MC2 QF  
 SF 500.2300222 MHz  
 WDW QNONE  
 SSB 0  
 LB 0 Hz  
 GB 0

Figure S12: <sup>13</sup>C-NMR, in CDCl<sub>3</sub>, of compound 5,6-dichloro-2-((3*aR*,5*R*,5*aS*,8*aS*,8*bR*)-2,2,7,7-tetramethyltetrahydro-5*H*-bis([1,3]dioxolo)[4,5-*b*:4',5'-*d*]pyran-5-yl)-1*H*-benzo[*d*]imidazole (5a)

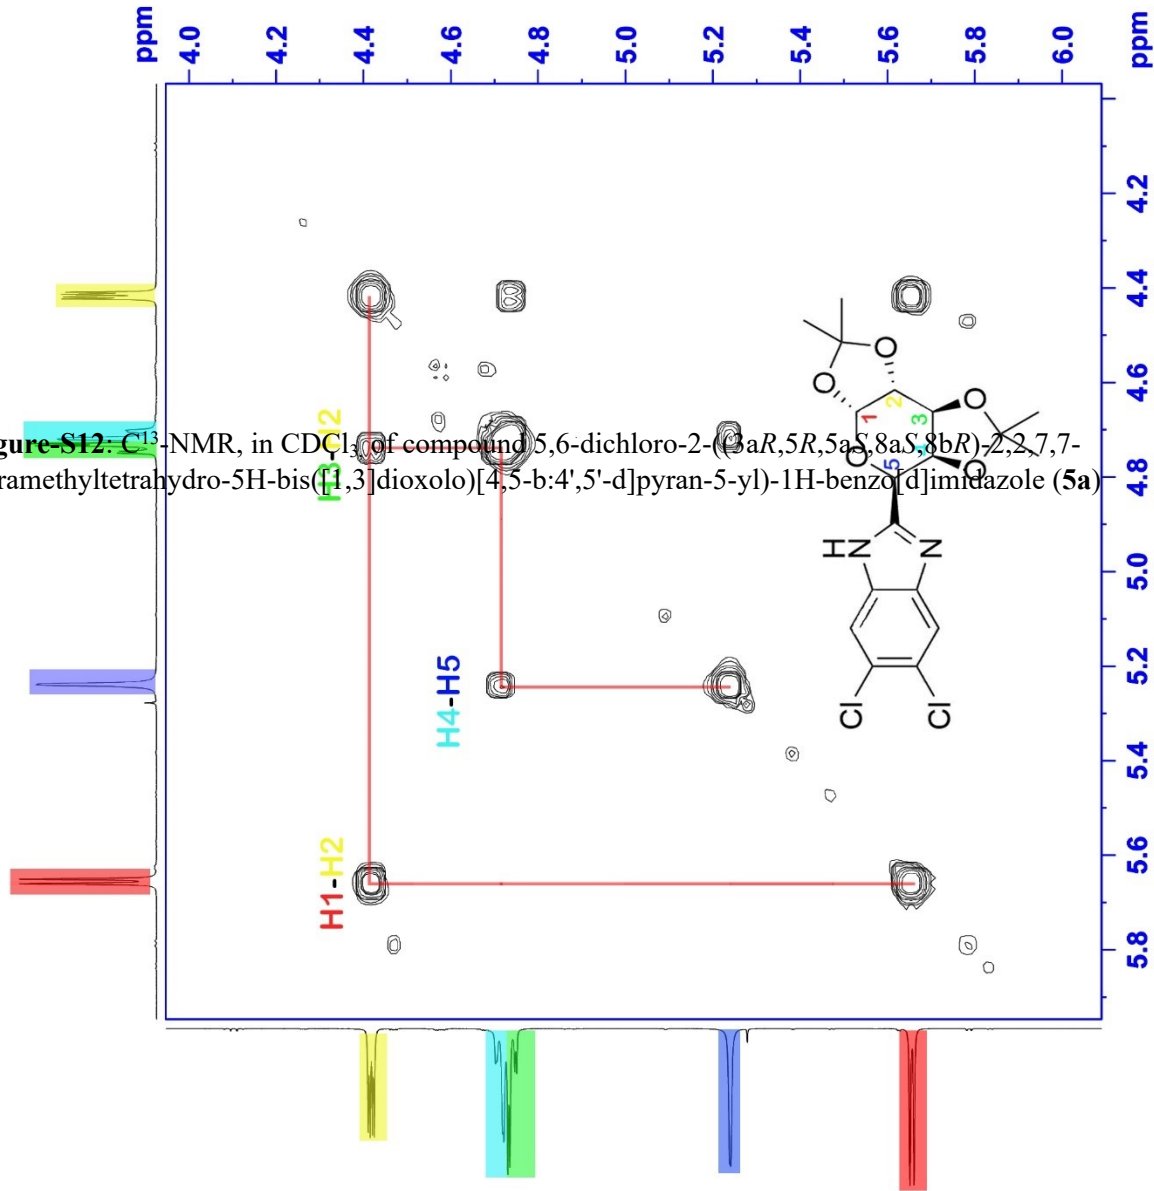

UMAIR/DR. SAMMER/UKG-ACL/CDCl<sub>3</sub>  
HSQC

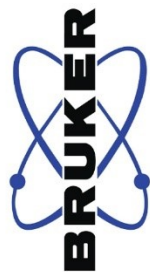

Current Data Parameters  
NAME exam1c\_1h  
EXPNO 4  
PROCNO 1

F2 - Acquisition Parameters  
Date\_ 20210905  
Time 0.06 h  
Date\_ 20210905  
Time 0.06 h  
PROBHD 28281 0183 TX  
PULPROG zgpg30  
F1FLPROG zgpg30  
TD 1024  
SOLVENT CDCl<sub>3</sub>  
NS 32  
DS 4  
SWH 5882.353 Hz  
FIDRES 11.488971 Hz  
AQ 0.0870400 sec  
RG 101  
DW 85.000 usec  
DE 1.300 usec  
TE 298.0 K  
CNST2 145.0000000  
D0 0.0000000 sec  
D1 1.5000000 sec  
D2 0.0000000 sec  
D3 0.0000000 sec  
D4 0.0000000 sec  
D5 0.0000000 sec  
D6 0.0000000 sec  
D7 0.0000000 sec  
D8 0.0000000 sec  
D9 0.0000000 sec  
D10 0.0000000 sec  
D11 0.0000000 sec  
D12 0.0000000 sec  
D13 0.0000000 sec  
D14 0.0000000 sec  
D15 0.0000000 sec  
D16 0.0000000 sec  
D17 0.0000000 sec  
D18 0.0000000 sec  
D19 0.0000000 sec  
D20 0.0000000 sec  
D21 0.0000000 sec  
D22 0.0000000 sec  
D23 0.0000000 sec  
D24 0.0000000 sec  
D25 0.0000000 sec  
D26 0.0000000 sec  
D27 0.0000000 sec  
D28 0.0000000 sec  
D29 0.0000000 sec  
D30 0.0000000 sec  
D31 0.0000000 sec  
D32 0.0000000 sec  
D33 0.0000000 sec  
D34 0.0000000 sec  
D35 0.0000000 sec  
D36 0.0000000 sec  
D37 0.0000000 sec  
D38 0.0000000 sec  
D39 0.0000000 sec  
D40 0.0000000 sec  
D41 0.0000000 sec  
D42 0.0000000 sec  
D43 0.0000000 sec  
D44 0.0000000 sec  
D45 0.0000000 sec  
D46 0.0000000 sec  
D47 0.0000000 sec  
D48 0.0000000 sec  
D49 0.0000000 sec  
D50 0.0000000 sec  
D51 0.0000000 sec  
D52 0.0000000 sec  
D53 0.0000000 sec  
D54 0.0000000 sec  
D55 0.0000000 sec  
D56 0.0000000 sec  
D57 0.0000000 sec  
D58 0.0000000 sec  
D59 0.0000000 sec  
D60 0.0000000 sec  
D61 0.0000000 sec  
D62 0.0000000 sec  
D63 0.0000000 sec  
D64 0.0000000 sec  
D65 0.0000000 sec  
D66 0.0000000 sec  
D67 0.0000000 sec  
D68 0.0000000 sec  
D69 0.0000000 sec  
D70 0.0000000 sec  
D71 0.0000000 sec  
D72 0.0000000 sec  
D73 0.0000000 sec  
D74 0.0000000 sec  
D75 0.0000000 sec  
D76 0.0000000 sec  
D77 0.0000000 sec  
D78 0.0000000 sec  
D79 0.0000000 sec  
D80 0.0000000 sec  
D81 0.0000000 sec  
D82 0.0000000 sec  
D83 0.0000000 sec  
D84 0.0000000 sec  
D85 0.0000000 sec  
D86 0.0000000 sec  
D87 0.0000000 sec  
D88 0.0000000 sec  
D89 0.0000000 sec  
D90 0.0000000 sec  
D91 0.0000000 sec  
D92 0.0000000 sec  
D93 0.0000000 sec  
D94 0.0000000 sec  
D95 0.0000000 sec  
D96 0.0000000 sec  
D97 0.0000000 sec  
D98 0.0000000 sec  
D99 0.0000000 sec  
D100 0.0000000 sec

ZGPGTNS  
SFO1 500.2330014 MHz  
NUC1 1H  
F1 8.00 usec  
P1 16.00 usec  
PCPD2 10.00 usec  
PLW1 18.45899963 W  
SFO2 125.7948829 MHz  
NUC2 13C  
CPDPRG2 garp  
P3 12.00 usec  
PCPD3 10.00 usec  
PLW2 229.03999329 W  
PLW12 6.73089981 W  
GPNAM[1] SWSQ10.100 %  
GPNAM[2] SWSQ10.100 %  
GPZ2 20.10 %  
PI6 1000.00 usec

F1 - Acquisition Parameters  
SFO1 125.7949 MHz  
FIDRES 196.293976 Hz  
SW 199.735 ppm  
FMODE Echo-Antiecho

F2 - Processing parameters  
SI 1024  
SF 500.2300222 MHz  
WDW EM  
SSB 2  
LB 0 Hz  
GB 1.40

F1 - Processing parameters  
SI 1024  
SF 125.792976 MHz  
WDW EM  
SSB 2  
LB 0 Hz  
GB 1.40

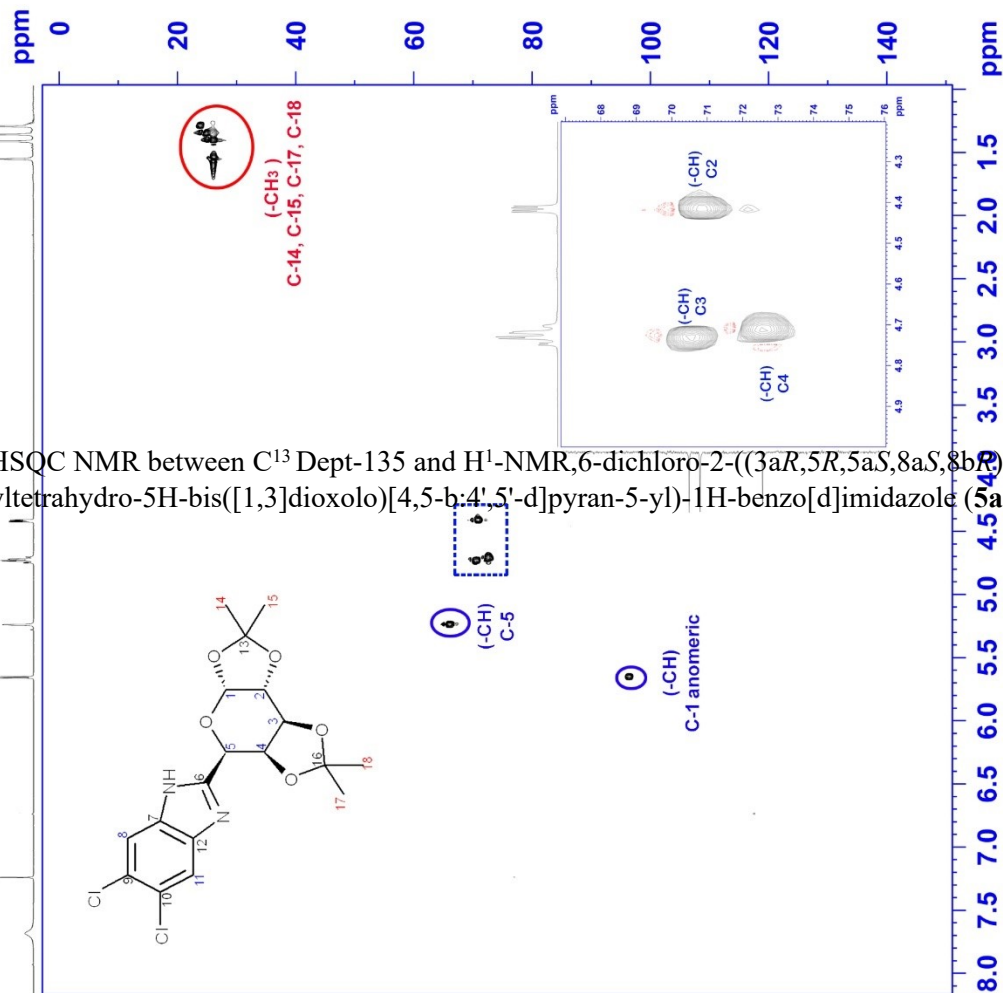

Figure-S13: 2D-HSQC NMR between C<sup>13</sup> Dept-135 and H<sup>1</sup>-NMR, 6-dichloro-2-((3aR,5R,5aS,8aS,8bR)-2,2,7,7-tetramethyltetrahydro-5H-bis([1,3]dioxolo)[4,5-b:4',5'-d]pyran-5-yl)-1H-benzo[d]imidazole (5a)



- FAB +ve low- and high- resolution Mass spectrometry of compound (**5a**) :

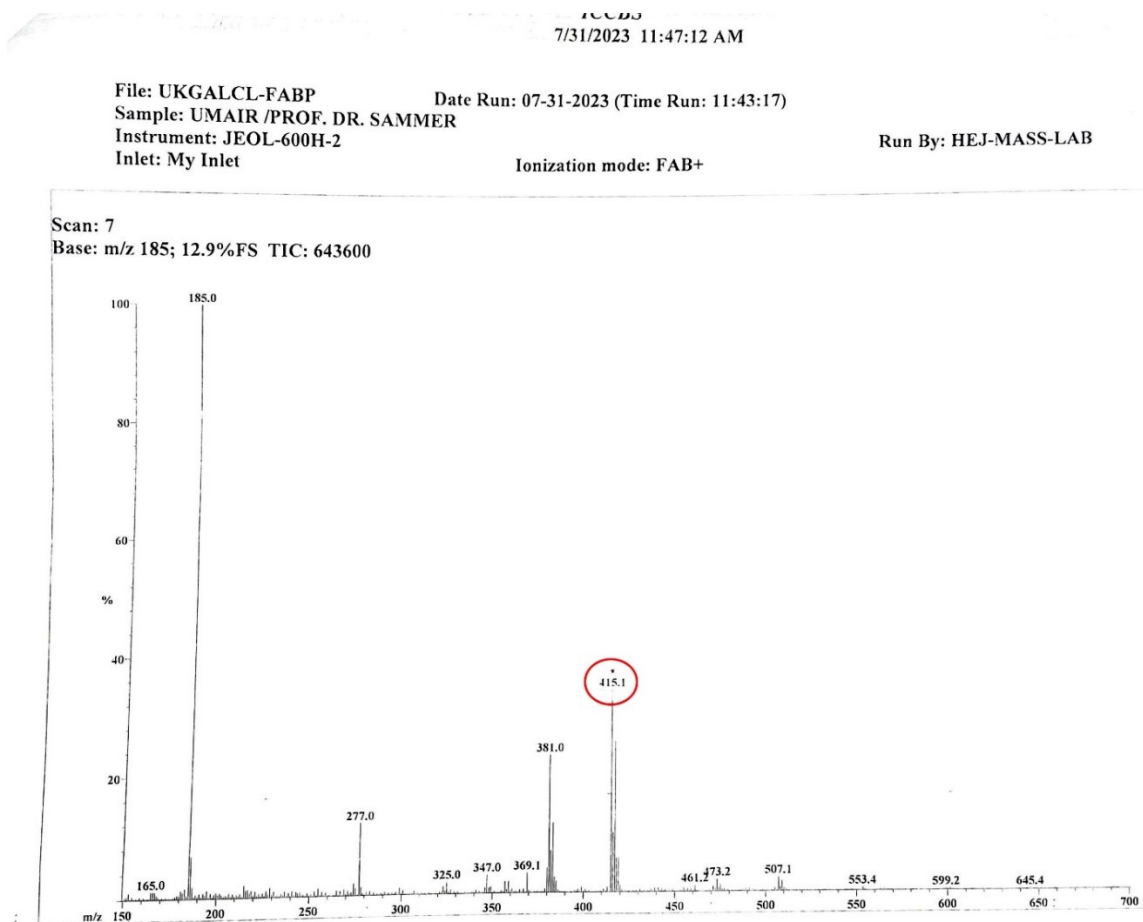

**Figure-S14:** Low resolution positive mode of FAB spectra of **5a**. Encircled is the  $m/z$  value 415.1.

High resolution FAB ( $m+1$ ) positive mode at JEOL HX 110 Mass spectrometer of compound **5a** is **415.0808**, while theoretical mass was 415.0828 which corresponds to the composition of  $C_{18}H_{21}O_5N_2Cl_2$ .

4. Spectra  
tetram  
benzo[c

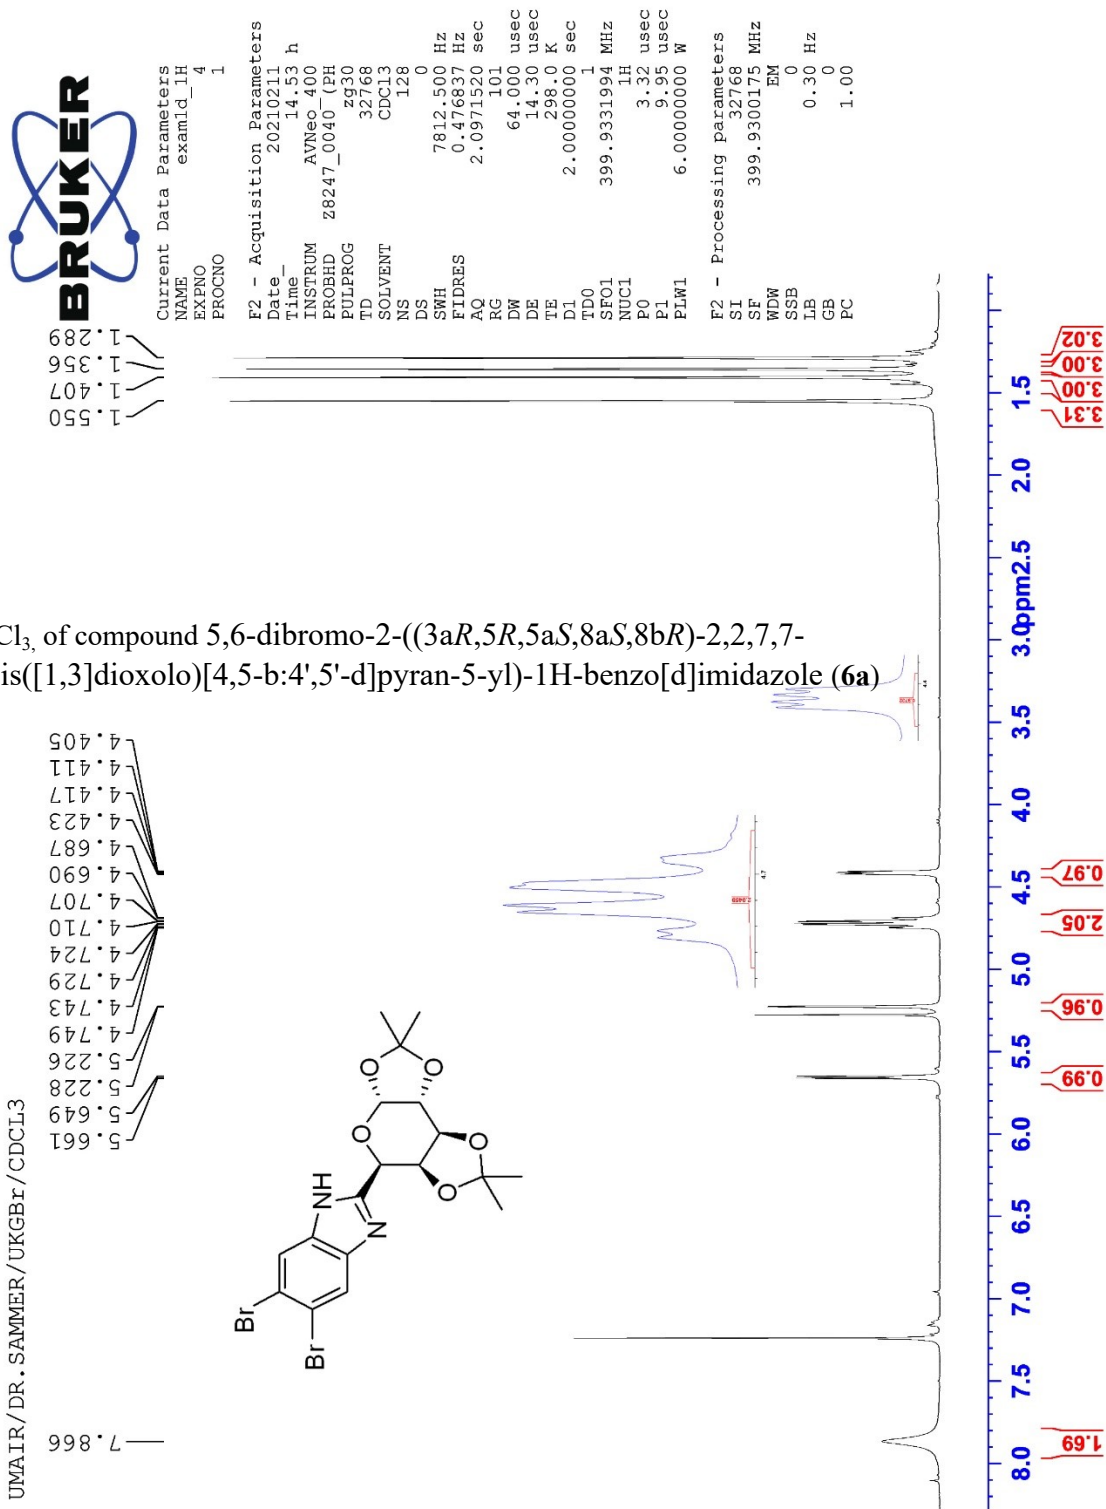

Figure-S15:  $^1\text{H-NMR}$ , in  $\text{CDCl}_3$ , of compound 5,6-dibromo-2-((3aR,5R,5aS,8aS,8bR)-2,2,7,7-tetramethyltetrahydro-5H-bis([1,3]dioxolo)[4,5-b:4',5'-d]pyran-5-yl)-1H-benzo[d]imidazole (6a)

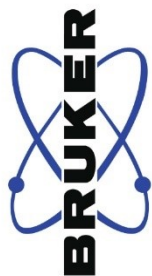

Current Data Parameters  
NAME examid\_1H  
EXPNO 1  
PROCNO 1

F2 - Acquisition Parameters  
Date 20210208  
Time 23.18 h  
INSTRUM AVNeo 500  
PROBHD Z8281\_0183\_1FX  
PULPROG zgpg  
TD 32768  
SOLVENT CDCl3  
NS 16384  
DS 4  
SWH 30120.482 Hz  
FIDRES 1.838408 Hz  
AQ 0.5439488 sec  
RG 101  
DM 16.600 usec  
DE 12.00 usec  
TE 298.0 K  
D1 2.00000000 sec  
D11 0.03000000 sec  
TD0 16  
SF01 125.7973986 MHz  
NUC1 13C  
P1 12.00 usec  
PLW1 229.03999329 W  
SF02 500.2320009 MHz  
NUC2 1H  
CPDPRG2 waltz65  
PCPD2 80.00 usec  
PLW2 18.4589963 W  
PLW12 0.18459000 W  
PLW13 0.09284900 W

F2 - Processing parameters  
SI 16384  
SF 125.7829347 MHz  
WDW EM  
SSB 0  
LB 1.00 Hz  
GB 0  
PC 1.40

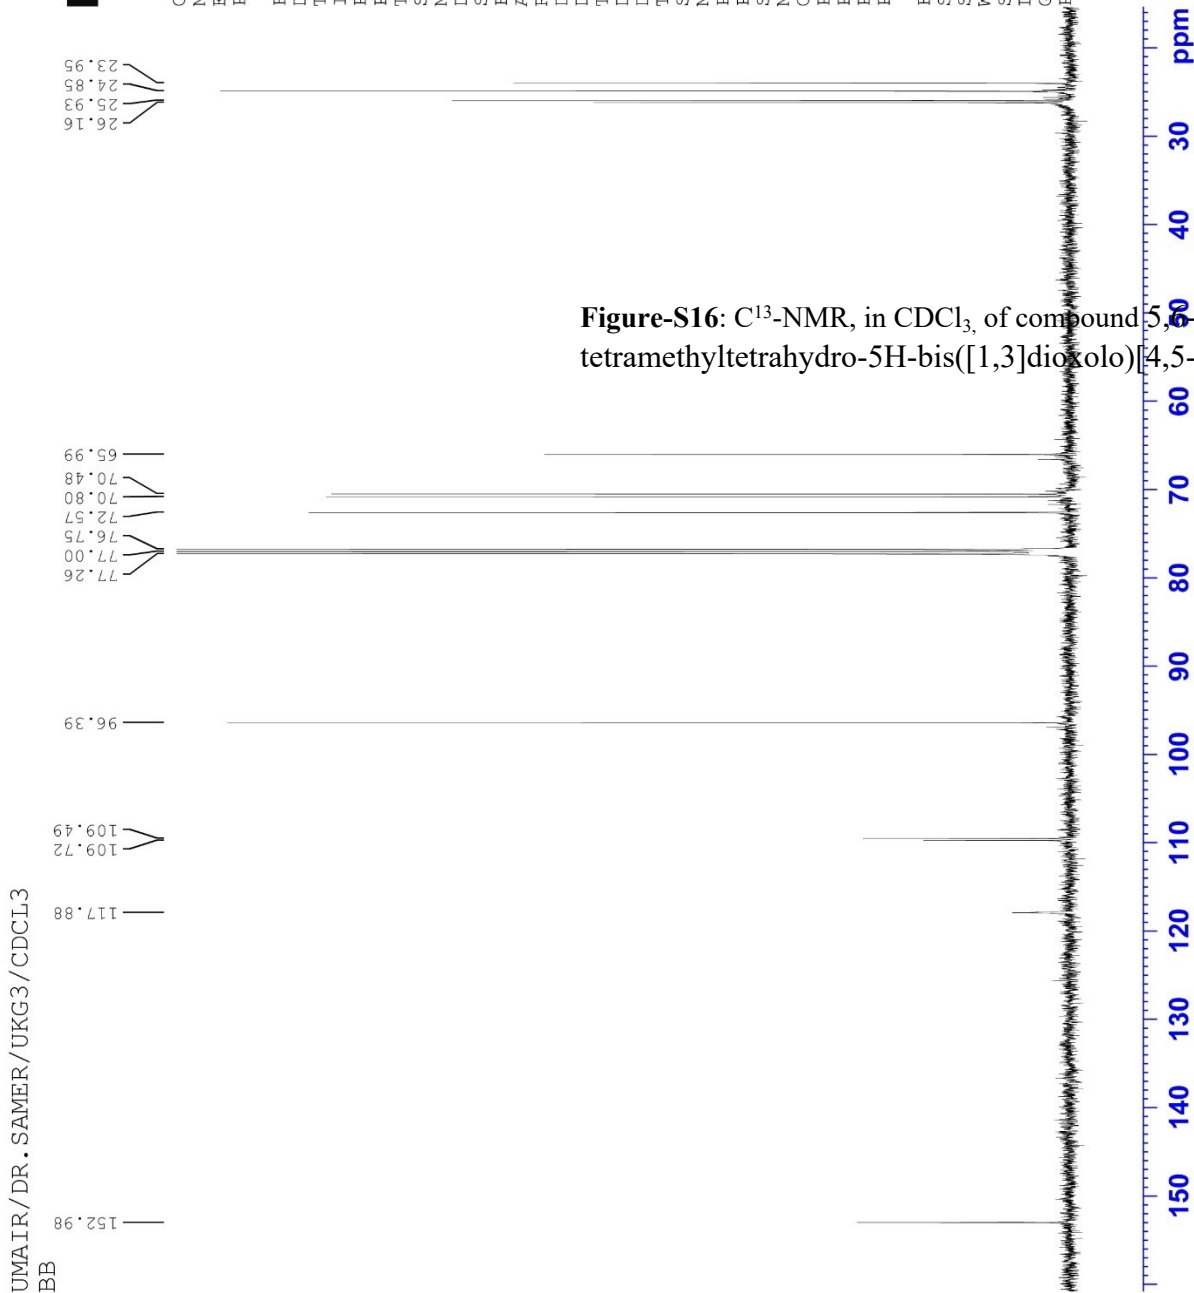

Figure-S16: <sup>13</sup>C-NMR, in CDCl<sub>3</sub>, of compound 5,5-dibromo-2-((3aR,4S)-tetramethyltetrahydro-5H-bis([1,3]dioxolo)[4,5-b:4',5'-d]pyran-5-yl)pyridine

UMAIR/DR. SAMER/UKG3/CDCL3  
HSQC

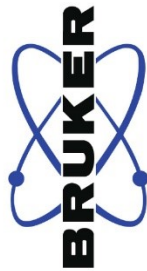

Current Data Parameters  
 NAME exam1d\_1h  
 EXPNO 3  
 PROCNO 1

F2 - Acquisition Parameters  
 Date\_ 20210211  
 Time\_ 22.41 h  
 INSTRUM AVNeo-500  
 PROBHD ZB2B1-CLB3-7X  
 P1 12.00 usec  
 TO FROG hsqcet32  
 SI 1024  
 SOLVENT CDCL3  
 NS 32  
 DS 5892.358 Hz  
 WDW EM  
 FIDRES 11.668971 Hz  
 AQ 0.0870400 sec  
 RG 101  
 DW 85.000 usec  
 DE 6.50 usec  
 TE 300.2 K  
 CHST2 145.0000000  
 D0 0.00000300 sec  
 D1 1.50000000 sec  
 D4 0.00172414 sec  
 D11 0.00000000 sec  
 D13 0.00000000 sec  
 D16 0.00000000 sec  
 D21 0.00020000 sec  
 D21 0.00345000 sec  
 INO 0.00001990 sec  
 Tdau  
 SFOPTNS  
 NU1 500.2329514 MHz  
 NU1 1H  
 P1 8.00 usec  
 P2 16.00 usec  
 F28 1000.00 usec  
 SFO2 500.1324999 MHz  
 SFO2 125.7548829 MHz  
 NUC2 13C  
 CPDPRG2 garp  
 P3 12.00 usec  
 P4 24.00 usec  
 P5 24.00 usec  
 PLW2 229.03999329 MHz  
 PLW2 6.73089981 M  
 GRNAM1 SMSQ10.100  
 GR21 SMSQ10.100 %  
 GR22 SMSQ10.100 %  
 PL6 1000.00 usec

F1 - Acquisition parameters  
 TD 256  
 SFO1 500.1324999 MHz  
 FIDRES 196.2693976 Hz  
 SN 199.735 PPM  
 FMODE Echo-Antiecho

F2 - Processing parameters  
 SF 500.2300220 MHz  
 WDW OSGINE  
 SSB 2  
 LB 0 Hz  
 GB 0  
 PC 1.40

F1 - Processing parameters  
 SI 1024  
 echo-antiecho  
 GRNAM1 SMSQ10.100 MHz  
 GR21 SMSQ10.100 MHz  
 GR22 SMSQ10.100 MHz  
 LB 0 Hz  
 GB 0

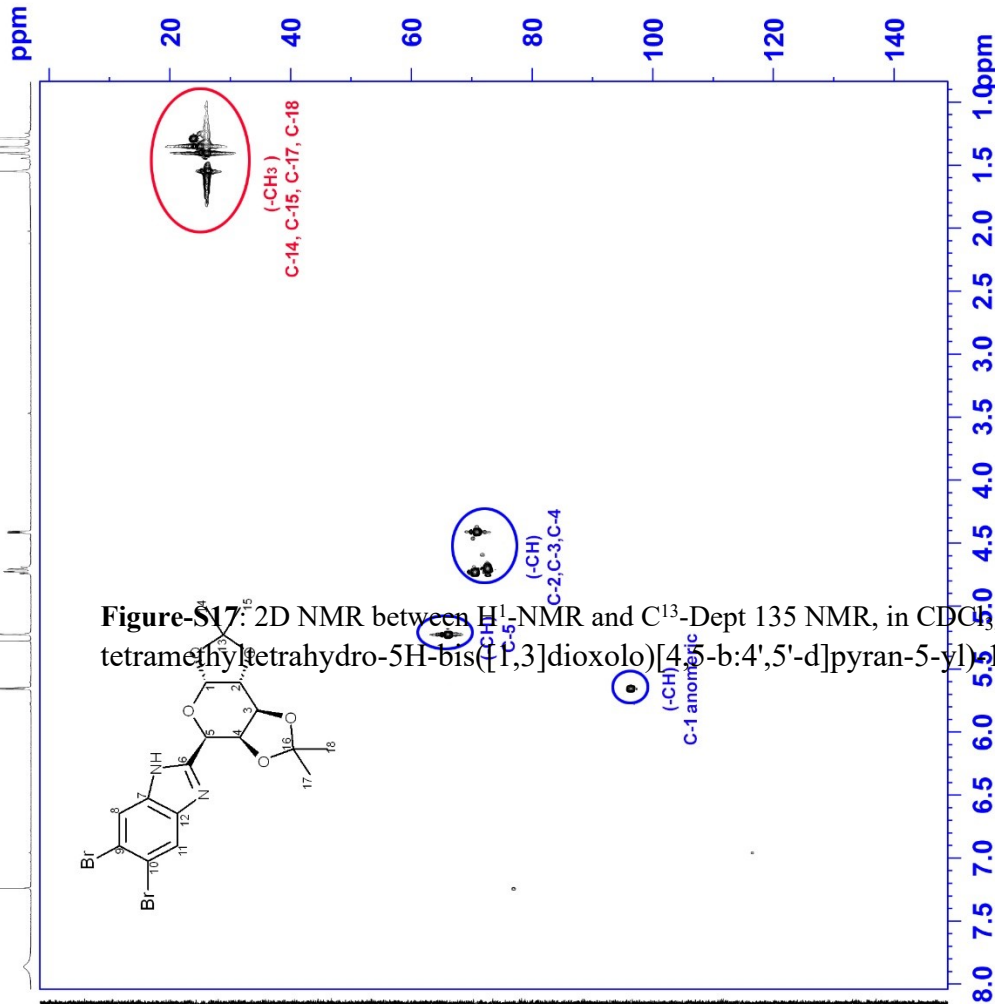

Figure-S17: 2D NMR between  $^1\text{H}$ -NMR and  $^{13}\text{C}$ -Dept 135 NMR, in  $\text{CDCl}_3$ , of compound tetramethyl tetrahydro-5H-bis(1,3-dioxolo)[4,5-b:4',5'-d]pyran-5-yl]-H-ben

**Figure-S18:**  $C^{13}$  NMR BB, Dept-135 and Dept-90, in  $CDCl_3$ , of compound 5,6-dibromo-2-((3*aR*,5*R*,5*aS*,8*aS*,8*bR*)-2,2,7,7-tetramethyltetrahydro-5H-bis([1,3]dioxolo)[4,5-*b*:4',5'-*d*]pyran-5-yl)-1*H*-benzo[*d*]imidazole (**6a**)

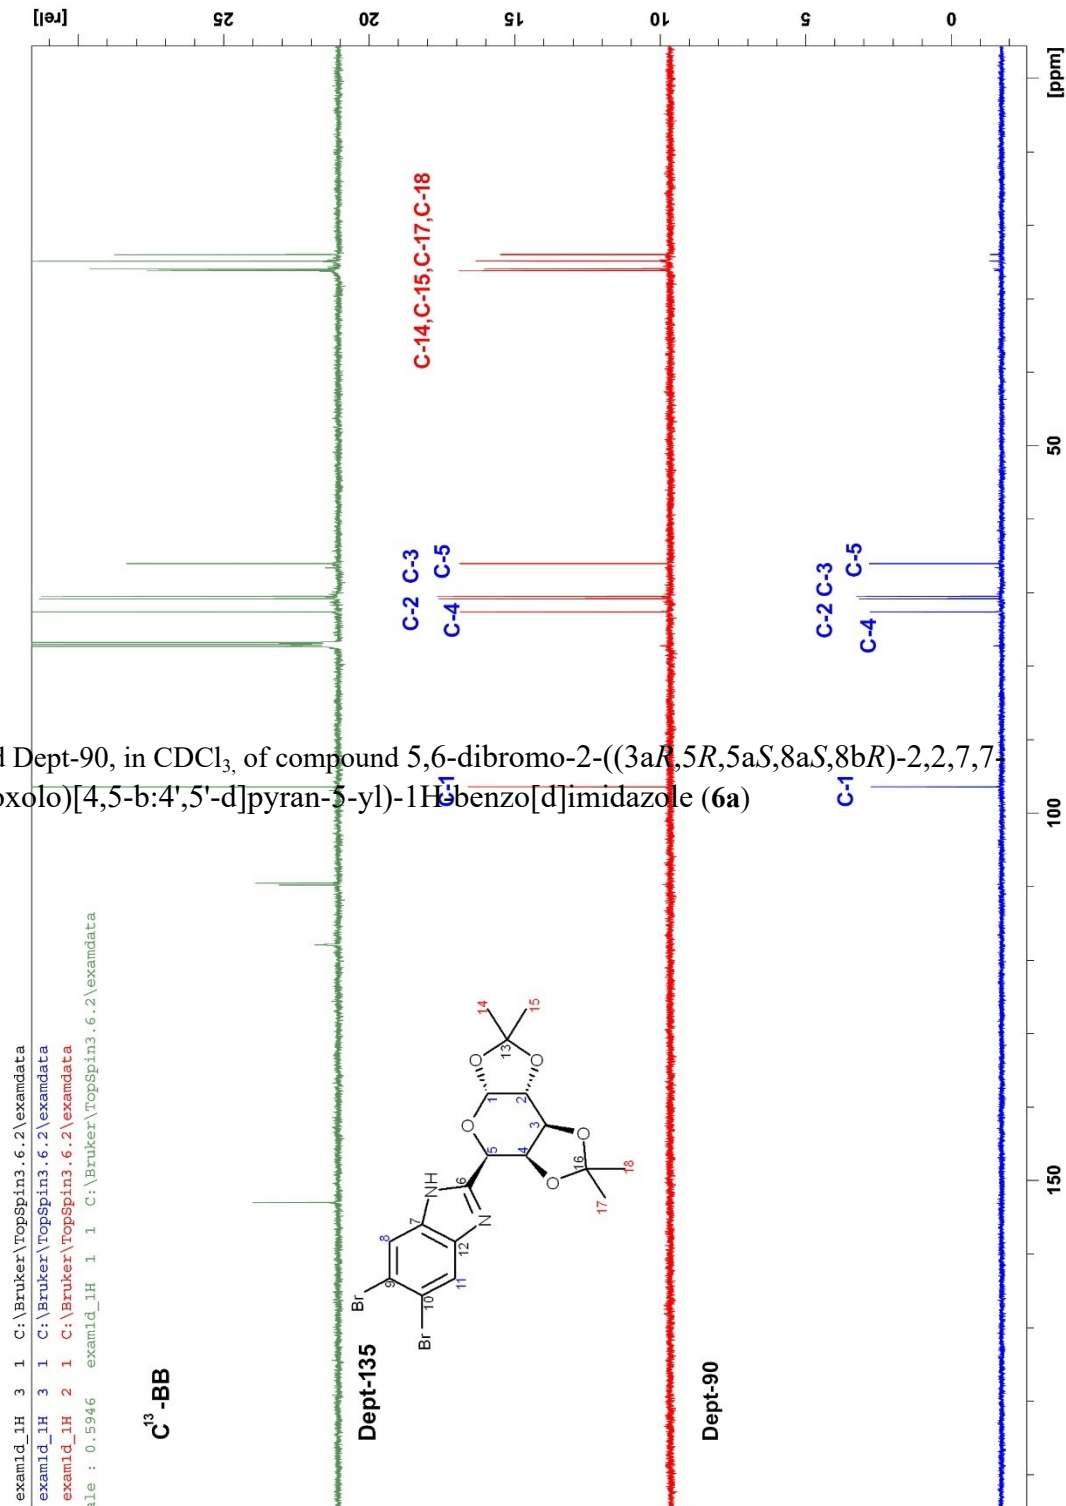

- FAB +ve low- and high- resolution Mass spectrometry of compound (6a)

7/31/2023 12:18:13 PM

File: UKG3-FABP

Date Run: 07-31-2023 (Time Run: 12:16:21)

Sample: UMAIR /PROF. DR. SAMMER

Instrument: JEOL-600H-2

Inlet: My Inlet

Ionization mode: FAB+

Run By: HEJ-MASS-LAB

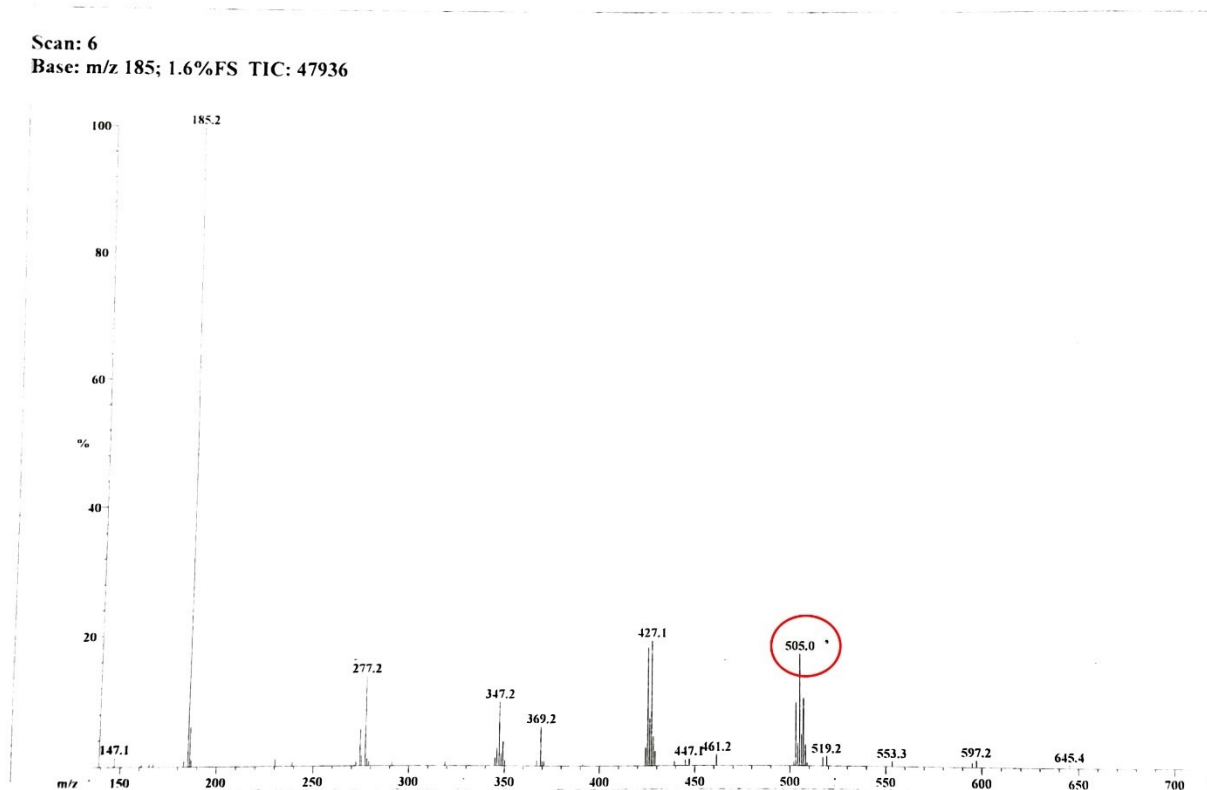

Figure-S19: Low resolution positive mode of FAB spectra of **6a**. Encircled is the  $m/z$  value **505.0**.

High resolution FAB positive mode at JEOL HX 110 Mass spectrometer of compound **6a** is **504.0808**, while theoretical mass was 504.1828 which corresponds to the composition of  $C_{18}H_{21}O_5N_2Br_2$ .

AVANCE NEO 400 MHz  
Lab # 115

5. 5-bromo-2-((3aR,5R,5aS,8aS,8bR)-2,2,7,7-tetramethyltetrahydro-5H-bis([1,3]dioxolo)[4,5-b:4',5'-d]pyran-5-yl)-1H-benzo[d]imidazole (7a):

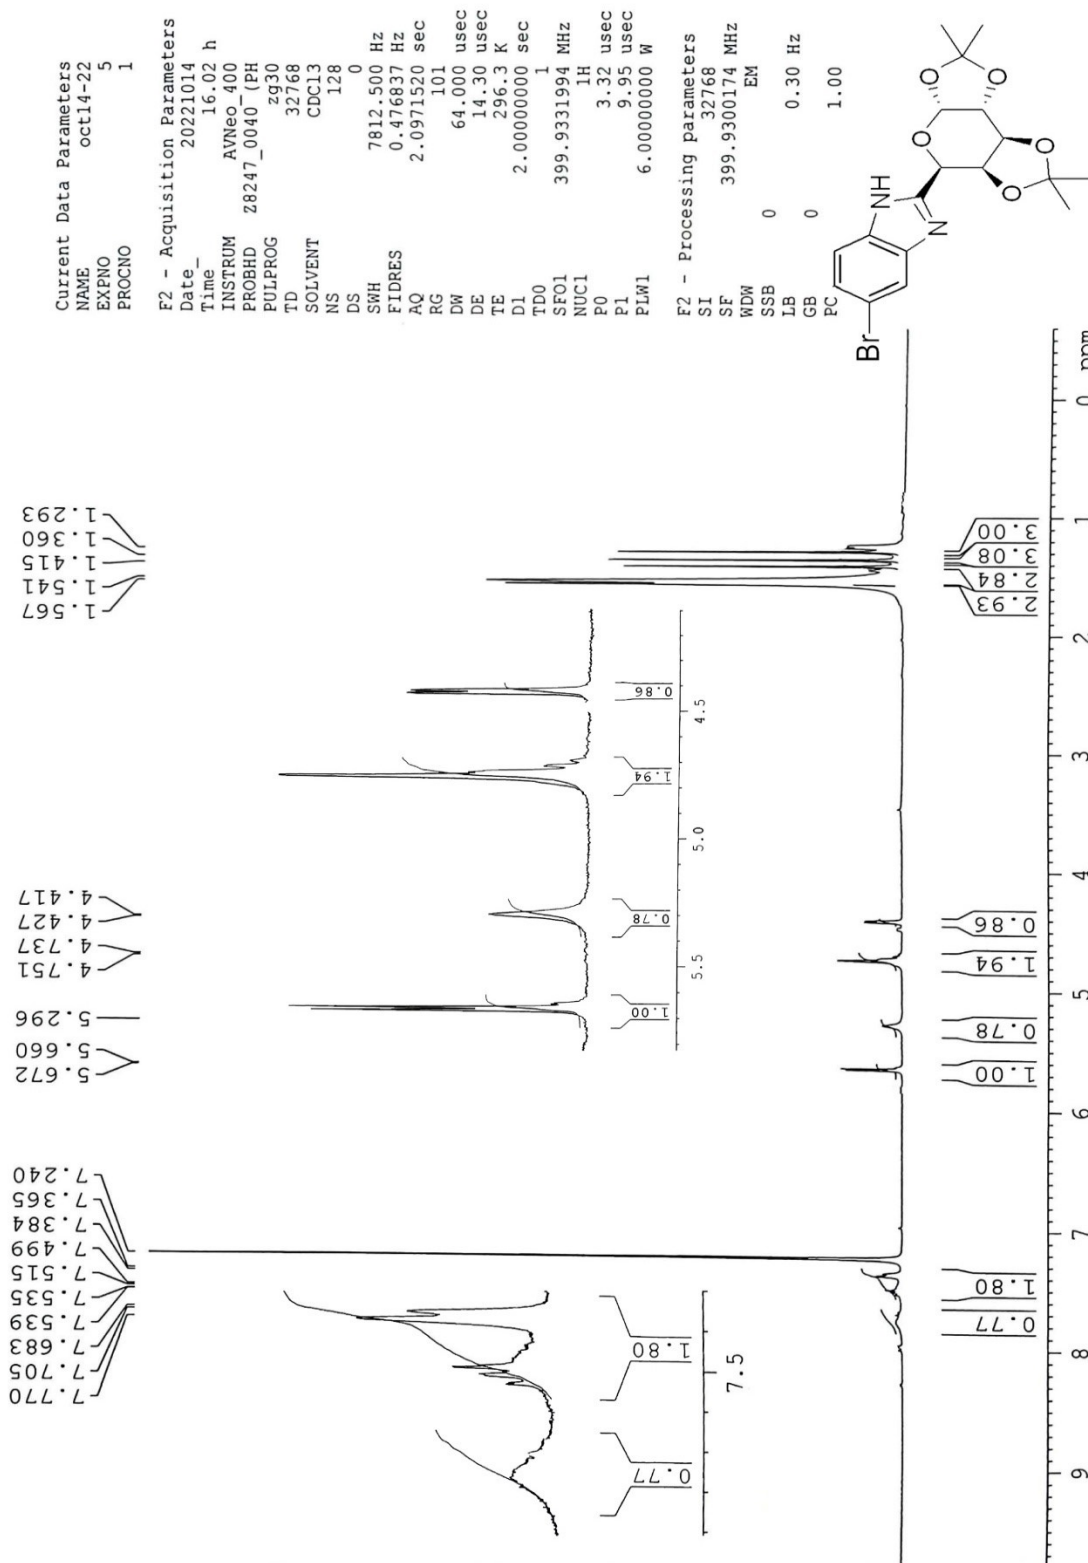

Figure-S20: <sup>1</sup>H NMR, in CDCl<sub>3</sub>, of compound 5-bromo-2-((3aR,5R,5aS,8aS,8bR)-2,2,7,7-tetramethyltetrahydro-5H-bis([1,3]dioxolo)[4,5-b:4',5'-d]pyran-5-yl)-1H-benzo[d]imidazole (7a):

- Mass spectrometry of compound (**7a**)

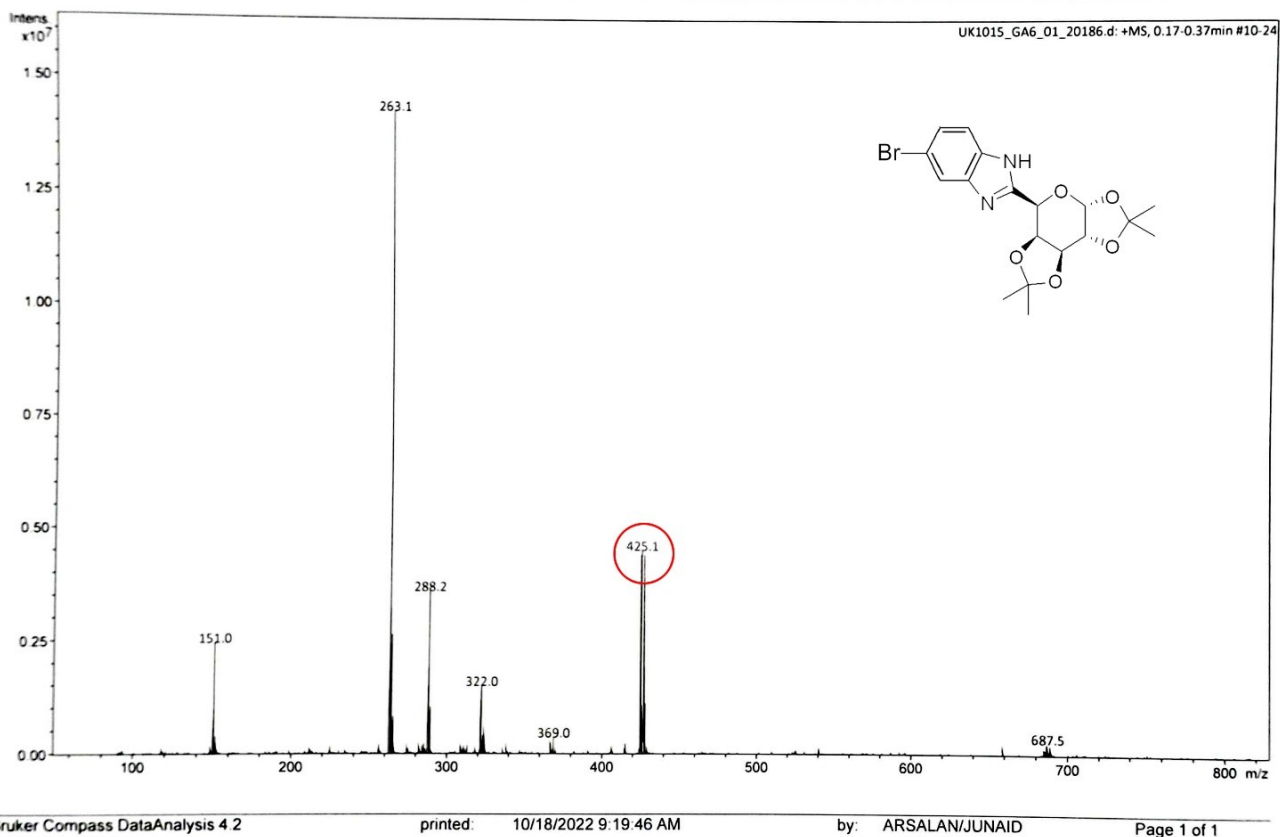

**Figure-S21:** LR-ESI MS positive of 5-bromo-2-((3aR,5R,5aS,8aS,8bR)-2,2,7,7-tetramethyltetrahydro-5H-bis([1,3]dioxolo)[4,5-b:4',5'-d]pyran-5-yl)-1H-benzo[d]imidazole (**7a**):

High resolution FAB positive mode (m+1) + ve mode at JEOL HX 110 Mass spectrometer of compound **7a** is **425.0808**, while theoretical mass was 425.1808 which corresponds to the composition of **C<sub>18</sub>H<sub>22</sub>BrN<sub>2</sub>O<sub>5</sub>**.



6. 2-((3a'*R*,5'*R*,5a'*S*,8a'*S*,8b'*R*)-tetrahydro-5'*H*-dispiro[cyclohexane-1,2'-bis([1,3]dioxolo)[4,5-b:4',5'-d]pyran-7',1''-cyclohexan]-5'-yl)-1*H*-benzo[d]imidazole (3b)

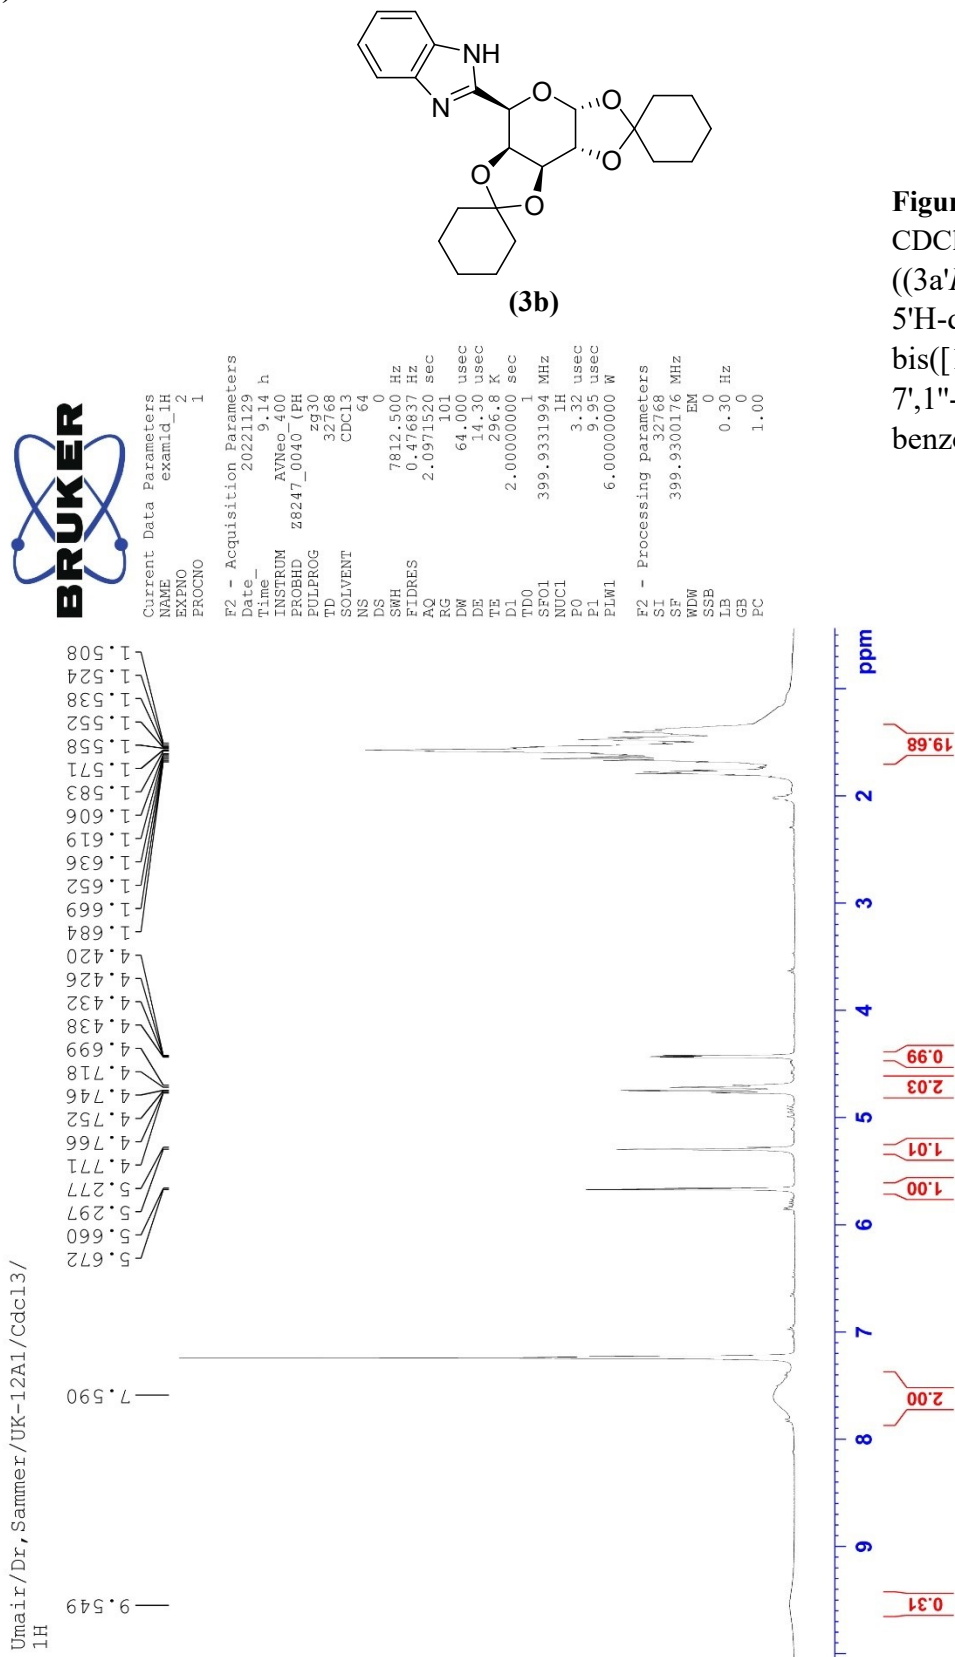

**Figure-S22:**  $^1\text{H}$ -NMR at 500MHz  $\text{CDCl}_3$ , of compound 2-((3a'*R*,5'*R*,5a'*S*,8a'*S*,8b'*R*)-tetrahydro-5'*H*-dispiro[cyclohexane-1,2'-bis([1,3]dioxolo)[4,5-b:4',5'-d]pyran-7',1''-cyclohexan]-5'-yl)-1*H*-benzo[d]imidazole

- FAB +ve low- and high- resolution Mass spectrometry of compound (**3b**)

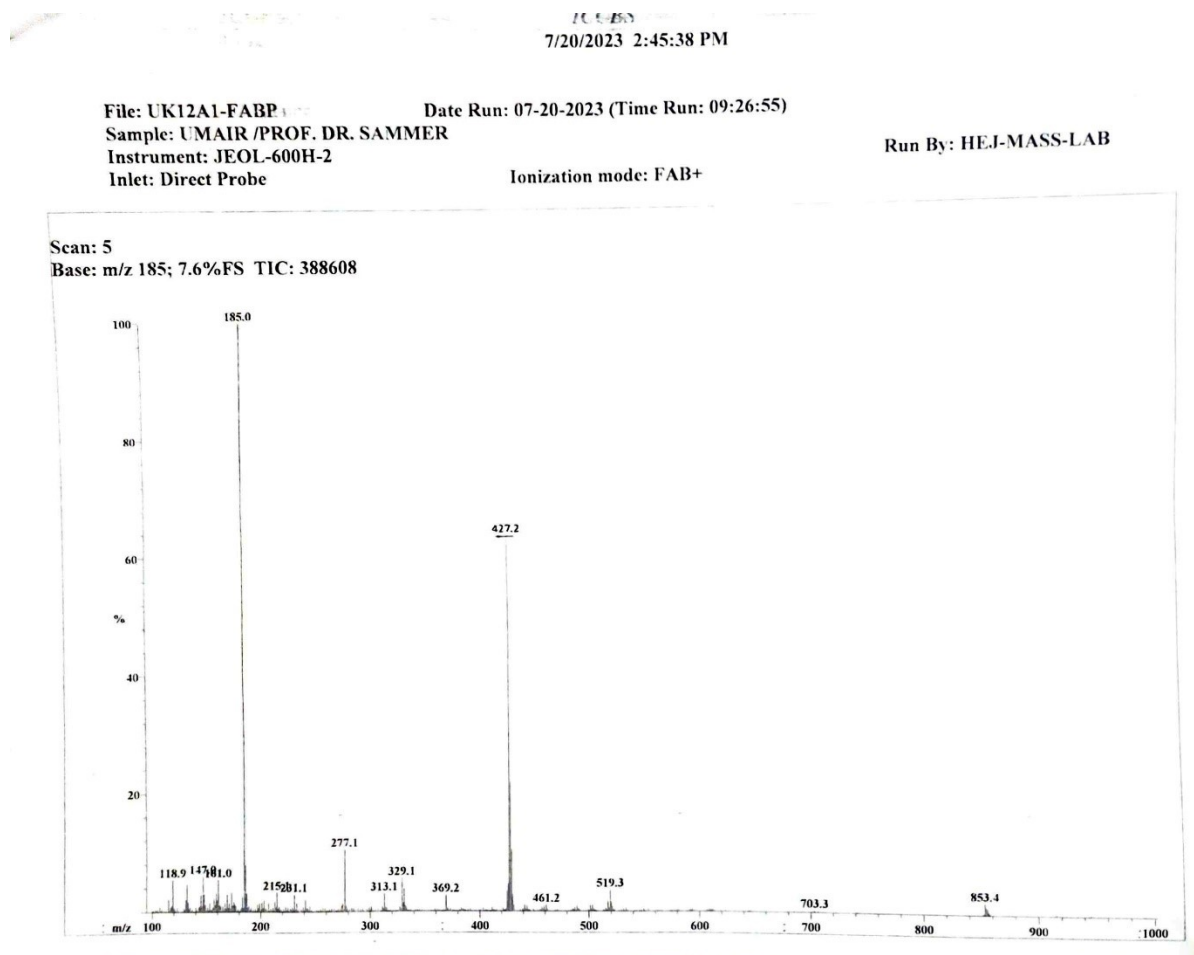

**Figure S23:** Low resolution FAB (+ve) of compound (**3b**) having m/z= 427.2

High resolution FAB (m+1) positive mode at JEOL HX 110 Mass spectrometer of compound **3b** is 427.2233, while theoretical mass was 427.2233 which corresponds to the composition of  $C_{24}H_{31}N_2O_5$ .

7. 5,6-difluoro-2-((3a'R,5'R,5a'S,8a'S,8b'R)-tetrahydro-5'H-dispiro[cyclohexane-1,2'-bis([1,3]dioxolo)[4,5-b:4',5'-d]pyran-7',1''-cyclohexan]-5'-yl)-1H-benzo[d]imidazole (4b)

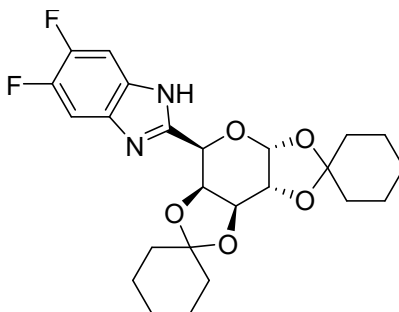

(4b)

Umair / Dr. Sammer / UK-I2A4R / CDCL3  
1H

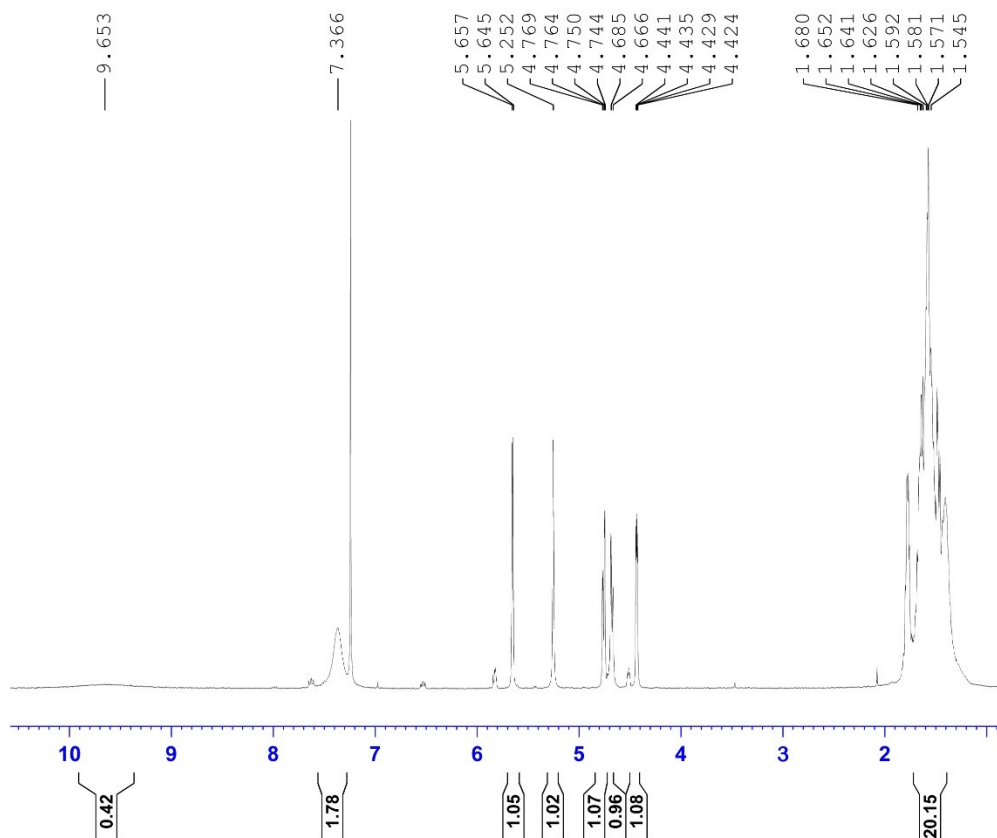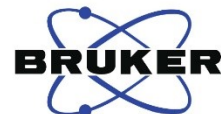

Current Data Parameters  
NAME examid\_1H  
EXPNO 1  
PROCNO 1

F2 - Acquisition Parameters  
Date\_ 20230729  
Time 14.48 h  
INSTRUM Avance NEO 400MHz  
PROBHD Z114854\_0013 (   
PULPROG zg30  
TD 32768  
SOLVENT CDCL3  
NS 16  
DS 0  
SWH 8196.722 Hz  
FIDRES 0.500288 Hz  
AQ 1.9988480 sec  
RG 101  
DW 61.000 usec  
DE 12.86 usec  
TE 299.3 K  
D1 2.0000000 sec  
TDO 1  
SFO1 400.1332010 MHz  
NUC1 1H  
PO 4.67 usec  
PI 14.00 usec  
PLW1 13.21300030 W

F2 - Processing parameters  
SI 16384  
SF 400.1300175 MHz  
WDW EM  
SSB 0  
LB 1.00 Hz  
GB 0  
PC 1.00

Figure-S24:  $^1\text{H-NMR}$ , in  $\text{CDCl}_3$ , of compound 5,6-difluoro-2-((3a'R,5'R,5a'S,8a'S,8b'R)-tetrahydro-5'H-dispiro[cyclohexane-1,2'-bis([1,3]dioxolo)[4,5-b:4',5'-d]pyran-7',1''-cyclohexan]-5'-yl)-1H-benzo[d]imidazole (4b)

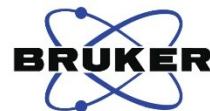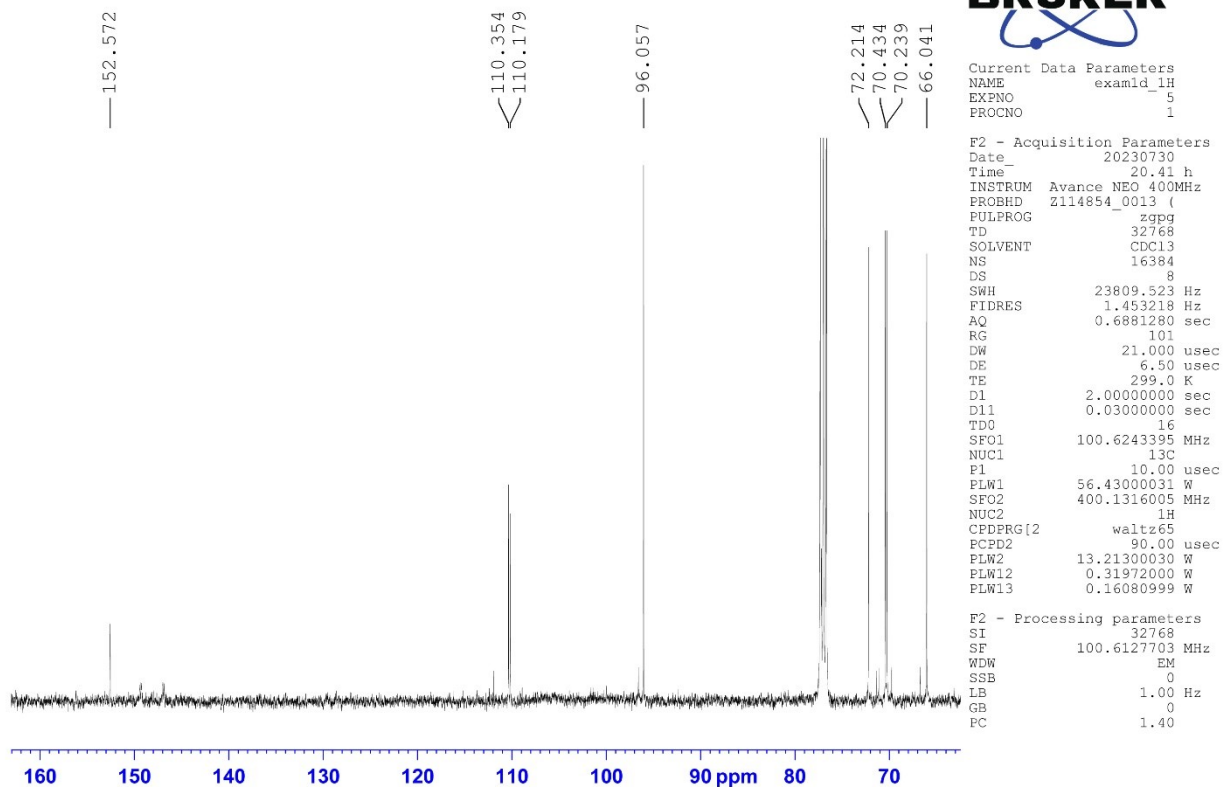

**Figure-S25:**  $C^{13}$ -NMR, in  $CDCl_3$ , of compound 5,6-difluoro-2-((3a'R,5'R,5a'S,8a'S,8b'R)-tetrahydro-5'H-dispiro[cyclohexane-1,2'-bis([1,3]dioxolo)[4,5-b:4',5'-d]pyran-7',1''-cyclohexan]-5'-yl)-1H-benzo[d]imidazole (**4b**)

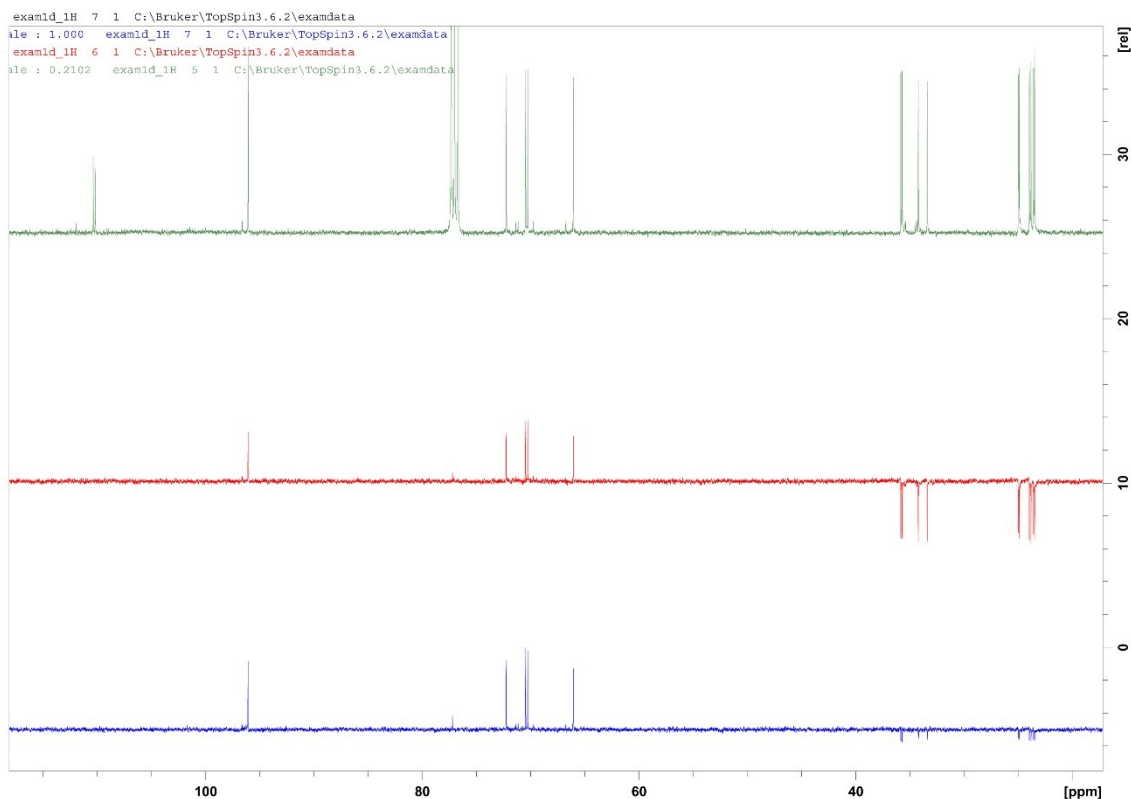

**Figure-S26:**  $C^{13}$ -NMR (BB, Dept-135, Dept-90), in  $CDCl_3$ , of compound 5,6-difluoro-2-((3a'R,5'R,5a'S,8a'S,8b'R)-tetrahydro-5'H-dispiro[cyclohexane-1,2'-bis([1,3]dioxolo)[4,5-b:4',5'-d]pyran-7',1''-cyclohexan]-5'-yl)-1H-benzo[d]imidazole (**4b**)

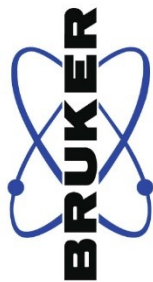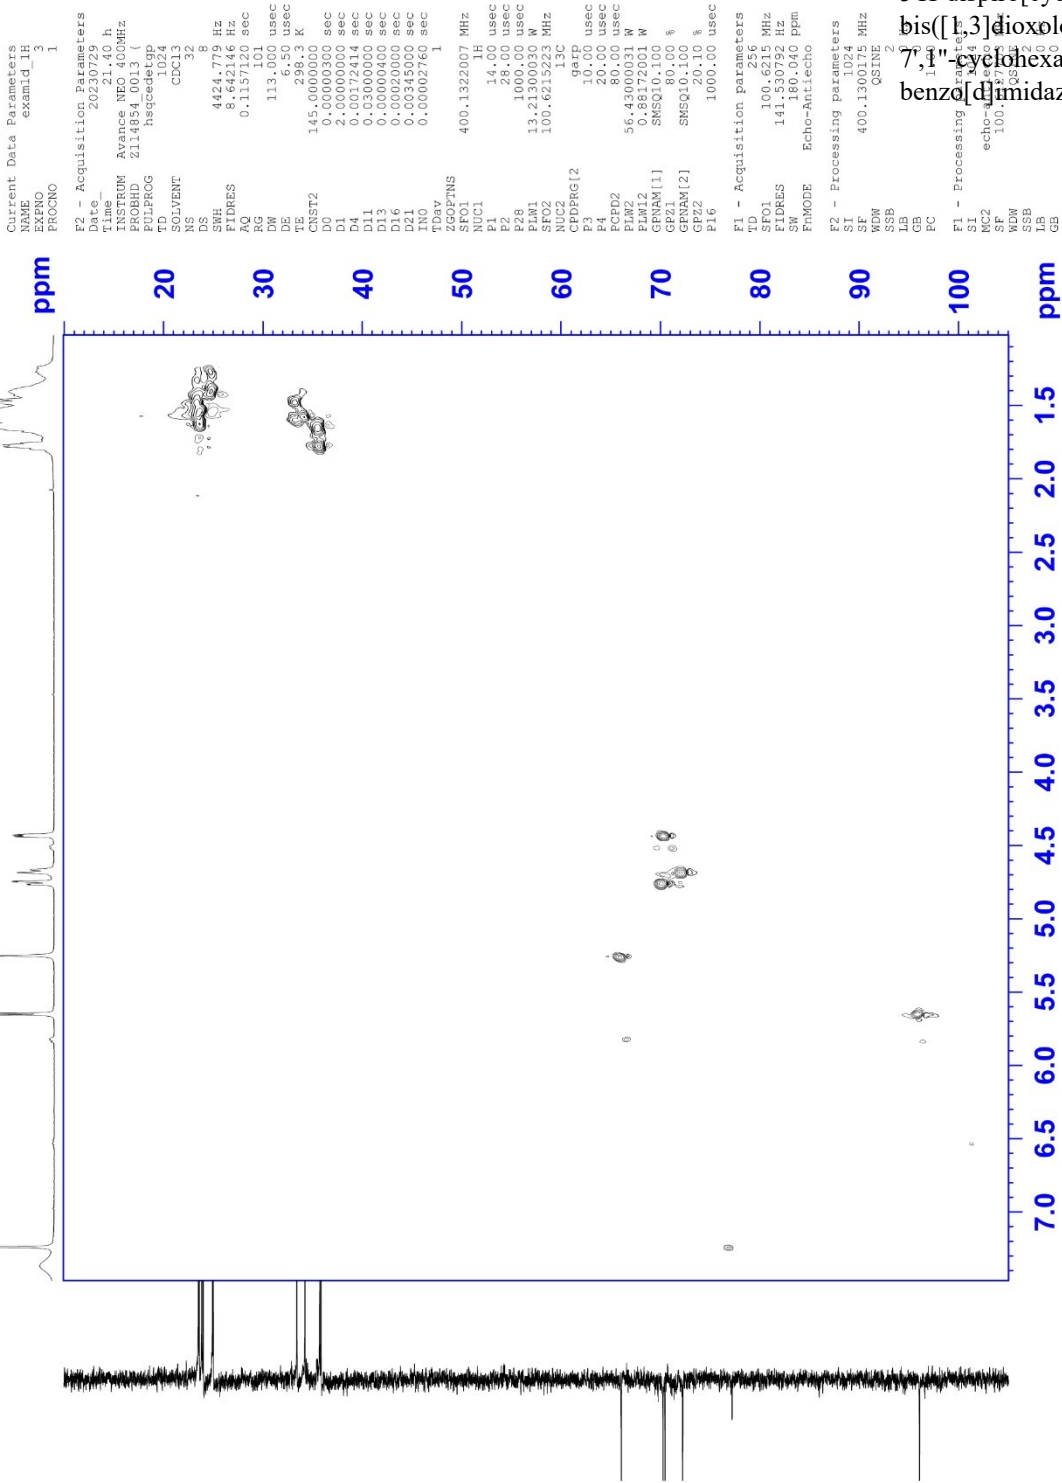

**Figure-S27:** 2D HSQC [<sup>1</sup>H-NMR and <sup>13</sup>C-NMR (Dept-135)], in CDCl<sub>3</sub>, of compound 5,6-difluoro-2-((3a'R,5'R,5a'S,8a'S,8b'R)-tetrahydro-5'H-dispiro[cyclohexane-1,2'-bis([1,3-dioxolo][4,5-b:4',5'-d]pyran-7,4''-cyclohexan)-5'-yl)-1H-benzo[*d*]imidazole (**4b**)

- FAB +ve mood low and high resolution of compound 4b

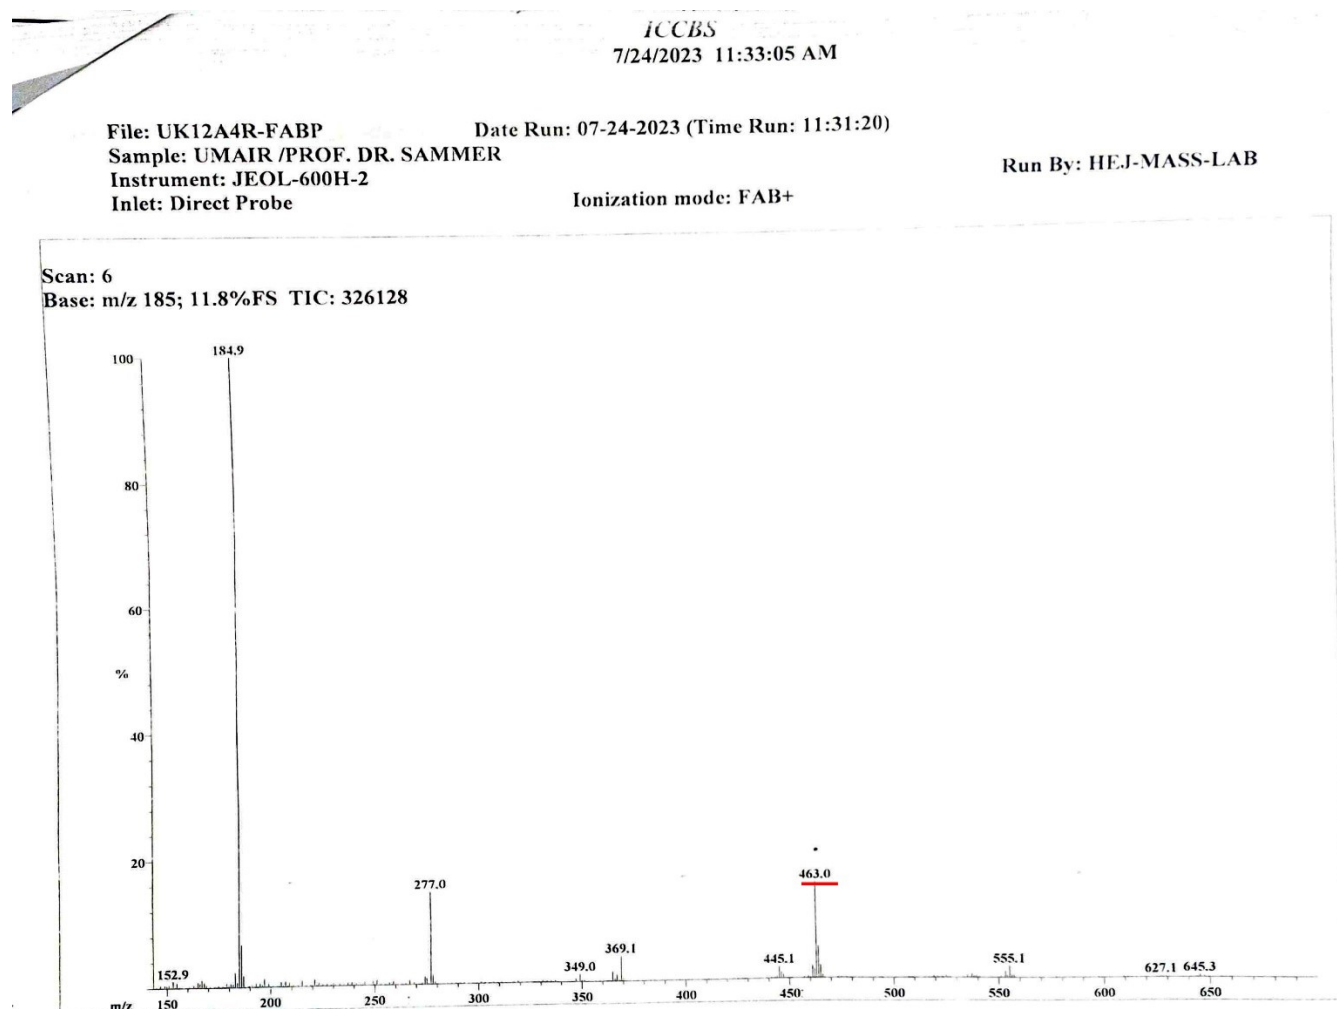

**Figure S28:** LR-FAB (+ve) shows the m/z value of 463.0 of compound (**4b**)

High resolution FAB positive mode at JEOL HX 110 Mass spectrometer of compound **4b** is **463.2059**, while theoretical mass was 463.2045 which corresponds to the composition of **C<sub>24</sub>H<sub>29</sub>N<sub>2</sub>O<sub>5</sub>F<sub>2</sub>**.

8. 5,6-dichloro-2-((3a'*R*,5'*R*,5a'*S*,8a'*S*,8b'*R*)-tetrahydro-5'*H*-dispiro[cyclohexane-1,2'-bis([1,3]dioxolo)[4,5-b:4',5'-d]pyran-7',1''-cyclohexan]-5'-yl)-1*H*-benzo[d]imidazole (5b):

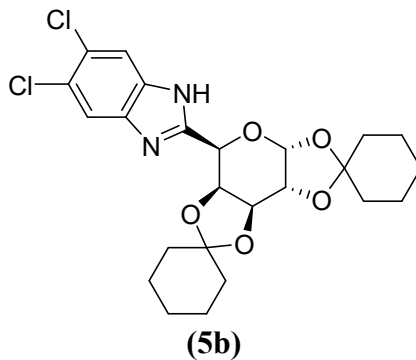

**Figure-S29:** <sup>1</sup>H-NMR at 500 MHz in CDCl<sub>3</sub>, of compound 5,6-dichloro-2-((3a'*R*,5'*R*,5a'*S*,8a'*S*,8b'*R*)-tetrahydro-5'*H*-dispiro[cyclohexane-1,2'-bis([1,3]dioxolo)[4,5-b:4',5'-d]pyran-7',1''-cyclohexan]-5'-yl)-1*H*-benzo[d]imidazole (5b)

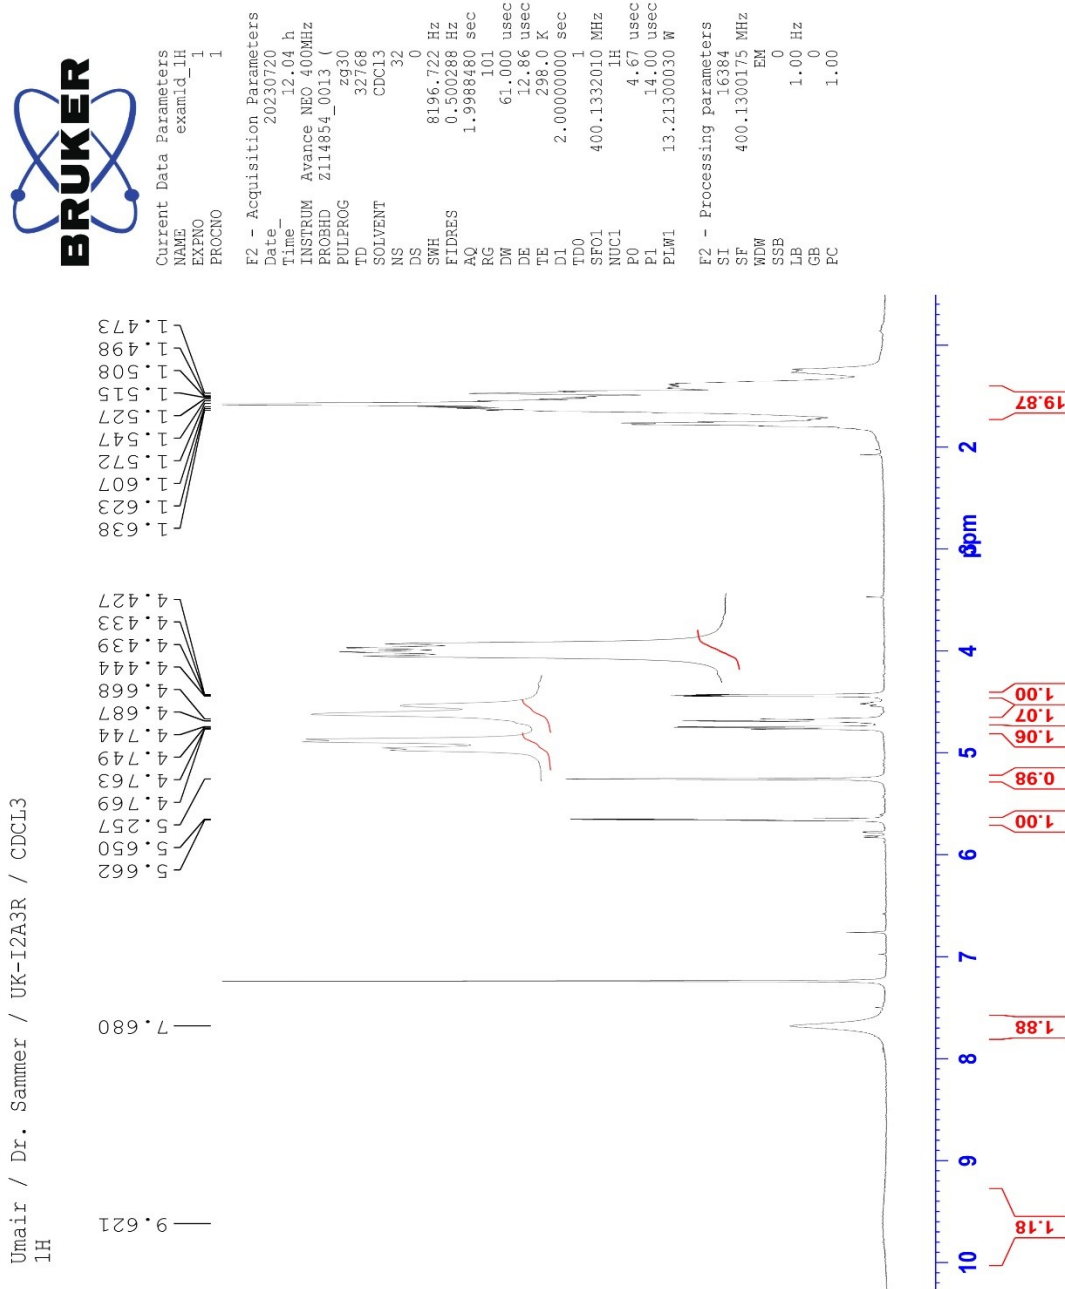

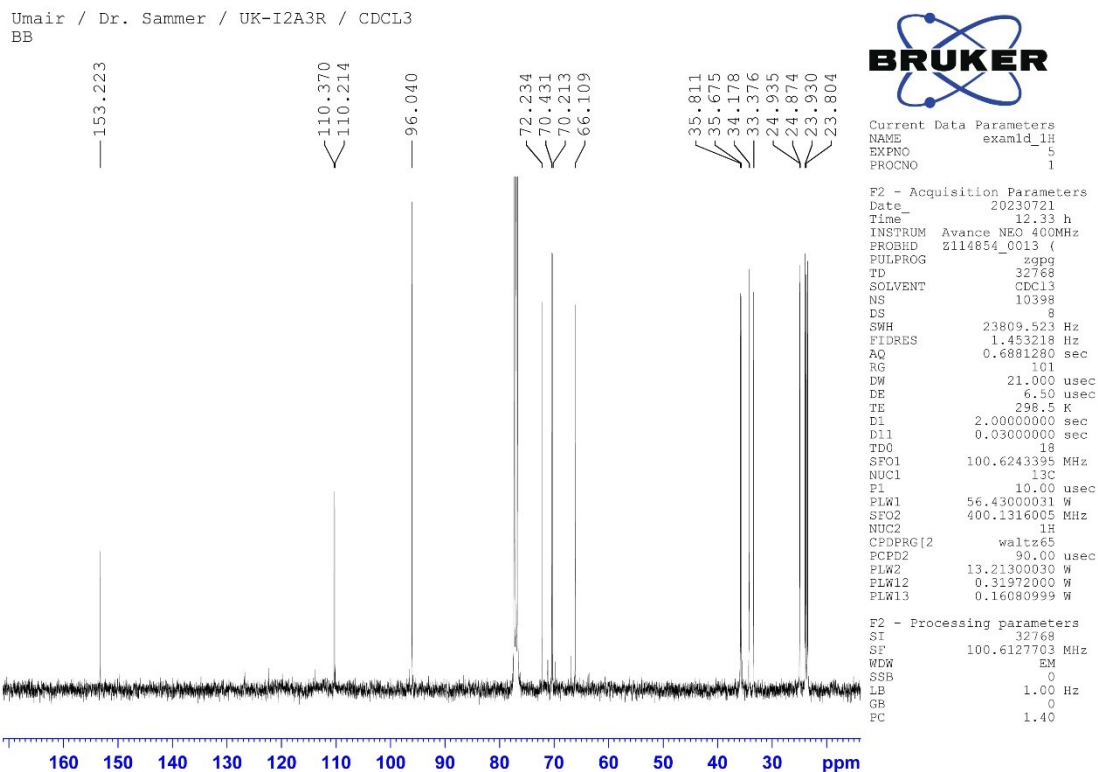

**Figure-S30:** <sup>13</sup>C-NMR Broad band, in CDCl<sub>3</sub>, of compound 5,6-dichloro-2-((3a'*R*,5'*R*,5a'*S*,8a'*S*,8b'*R*)-tetrahydro-5'*H*-dispiro[cyclohexane-1,2'-bis([1,3]dioxolo)[4,5-b:4',5'-d]pyran-7',1''-cyclohexan]-5'-yl)-1*H*-benzo[d]imidazole (**5b**)

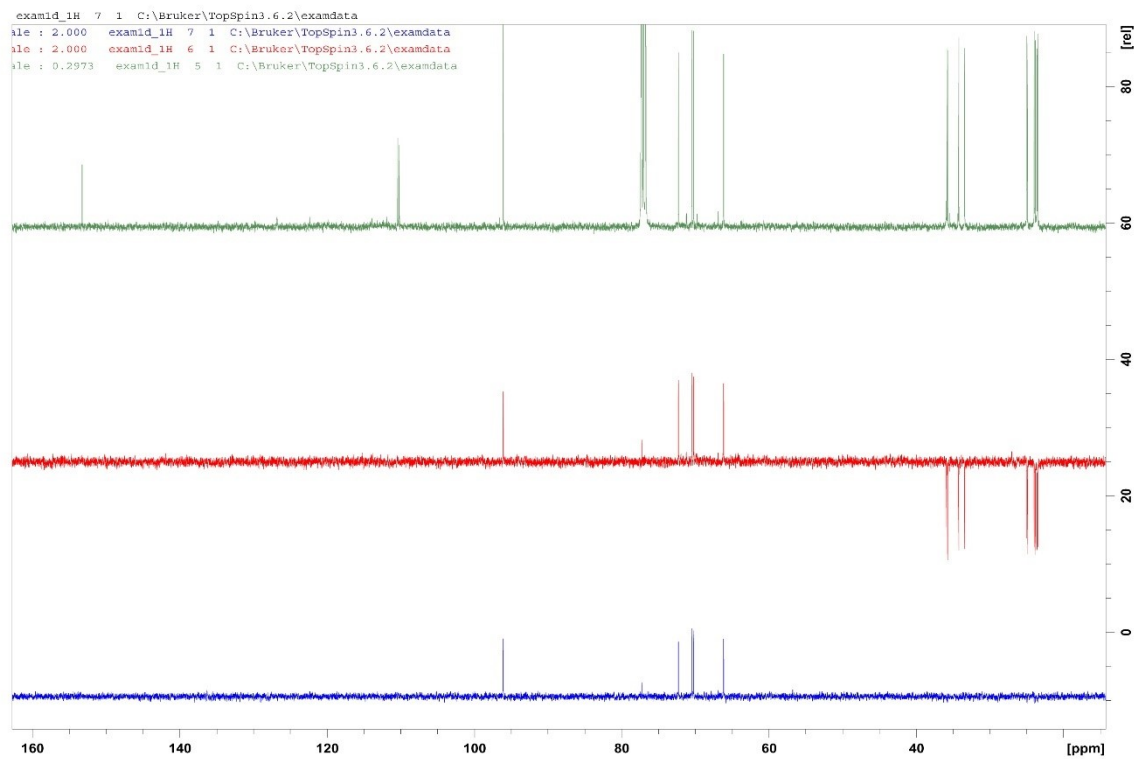

**Figure-S31:** <sup>13</sup>C-NMR BB, DEPT-135, DEPT-90, in CDCl<sub>3</sub>, of compound 5,6-dichloro-2-((3a'*R*,5'*R*,5a'*S*,8a'*S*,8b'*R*)-tetrahydro-5'*H*-dispiro[cyclohexane-1,2'-bis([1,3]dioxolo)[4,5-b:4',5'-d]pyran-7',1''-cyclohexan]-5'-yl)-1*H*-benzo[d]imidazole (**5b**)



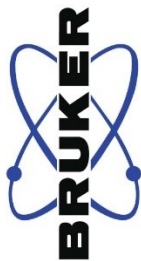

Current Data Parameters  
 NAME examid\_1H  
 EXPNO 3  
 PROCNO 1

F2 - Acquisition Parameters  
 Date\_ 20230720  
 Time 17:59 h  
 INSTRUM Advance NEO 400MHz  
 PROBHD Z11484\_0013  
 P1PRG1 zgpg30  
 TD 1024  
 SOLVENT CDCL3  
 NS 32  
 DS 4

SH 3968.254 Hz  
 FIDRES 7.750496 Hz  
 AQ 0.1280240 sec  
 RG 101  
 DW 126.00 usec  
 DE 6.50 usec  
 TE 298.15 K  
 CNST2 145.0000000  
 D0 0.0000000 sec  
 D1 0.0000000 sec  
 DA 0.0172314 sec  
 D11 0.030000000 sec  
 D13 0.000004000 sec  
 D16 0.000200000 sec  
 D18 0.000000000 sec  
 INO 0.0002760 sec

TDav 1  
 ZGPTNS 400.1319606 MHz  
 SFO1 400.1319606 MHz  
 P1 14.00 usec  
 P2 28.00 usec  
 P28 1000.00 usec  
 SFO2 100.6215230 MHz  
 SFO3 100.6215230 MHz  
 NUC2 13C  
 CPDPRG2 garp  
 P3 10.00 usec  
 P4 10.00 usec  
 P5 10.00 usec  
 P6 10.00 usec  
 P7 10.00 usec  
 P8 10.00 usec  
 P9 10.00 usec  
 P10 10.00 usec  
 P11 10.00 usec  
 P12 10.00 usec  
 P13 10.00 usec  
 P14 10.00 usec  
 P15 10.00 usec  
 P16 1000.00 usec

F1 - Acquisition Parameters  
 TD 256  
 SFO1 100.6215 MHz  
 FIDRES 141.530792 Hz  
 SWH 180.040 Ppm  
 F2 - Processing parameters  
 SI 1024  
 SF 400.130015 MHz  
 DE 6.50 usec  
 QSIN2  
 LB 0 Hz  
 GB 0  
 FC 1.00

F1 - Processing parameters  
 SI 1024  
 MC2 echo-antiecho  
 PE 100.615230 MHz  
 P1 14.00 usec  
 P2 28.00 usec  
 P3 10.00 usec  
 P4 10.00 usec  
 P5 10.00 usec  
 P6 10.00 usec  
 P7 10.00 usec  
 P8 10.00 usec  
 P9 10.00 usec  
 P10 10.00 usec  
 P11 10.00 usec  
 P12 10.00 usec  
 P13 10.00 usec  
 P14 10.00 usec  
 P15 10.00 usec  
 P16 1000.00 usec

F2 - Processing parameters  
 SI 1024  
 SF 400.130015 MHz  
 DE 6.50 usec  
 QSIN2  
 LB 0 Hz  
 GB 0  
 FC 1.00

F1 - Processing parameters  
 SI 1024  
 MC2 echo-antiecho  
 PE 100.615230 MHz  
 P1 14.00 usec  
 P2 28.00 usec  
 P3 10.00 usec  
 P4 10.00 usec  
 P5 10.00 usec  
 P6 10.00 usec  
 P7 10.00 usec  
 P8 10.00 usec  
 P9 10.00 usec  
 P10 10.00 usec  
 P11 10.00 usec  
 P12 10.00 usec  
 P13 10.00 usec  
 P14 10.00 usec  
 P15 10.00 usec  
 P16 1000.00 usec

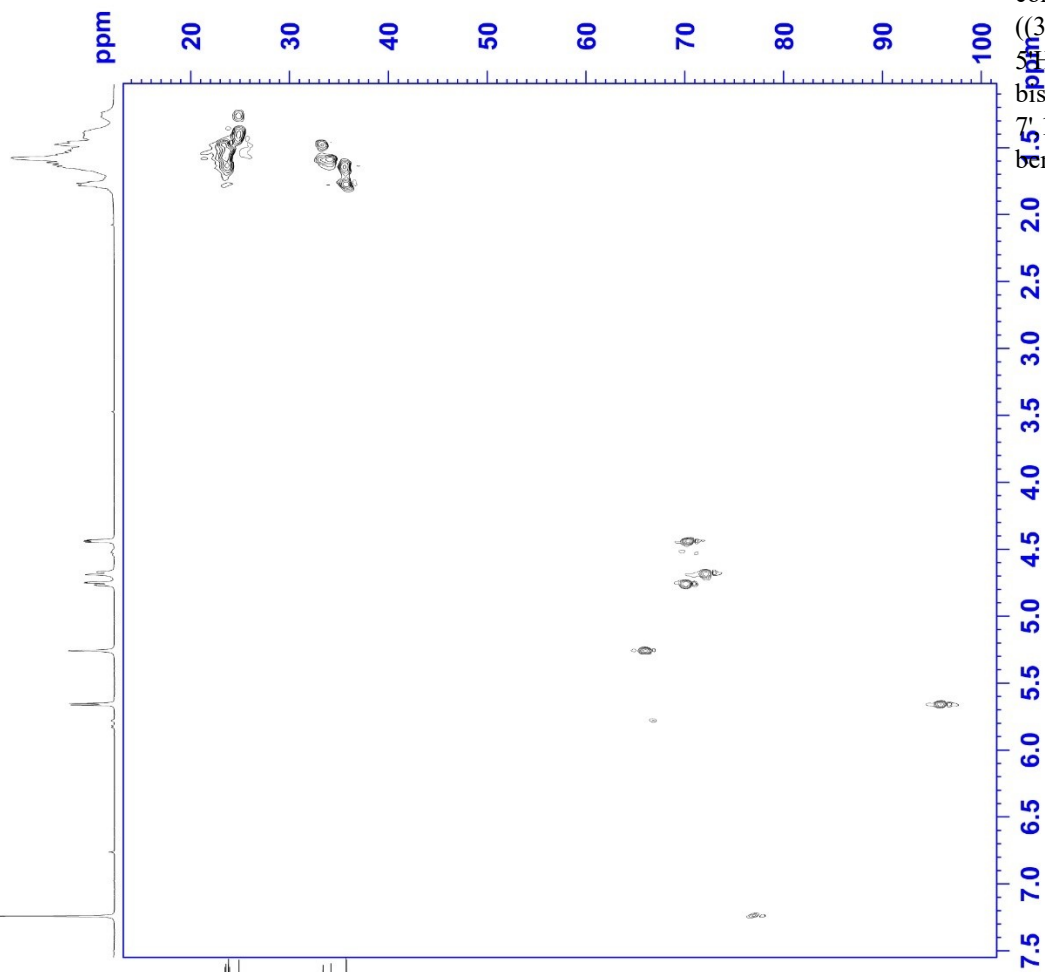

Figure-S32: 2D HSQC NMR spectrum of compound **5b** (3a'R,5'R,5a'S,8a'S,8b'R)-tetrakis[1,3]dioxolo[4,5-b:4',5'-b']-1,2,3,4-tetrahydro-1H-benzo[d]imidazole (**5b**)

- Single crystal XRD analysis of compound **5a**

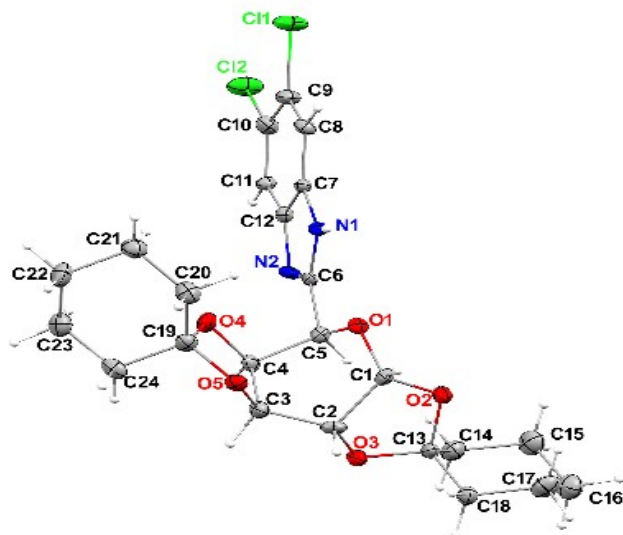

**Figure-S33:** ORTEP view of compound **5b**.

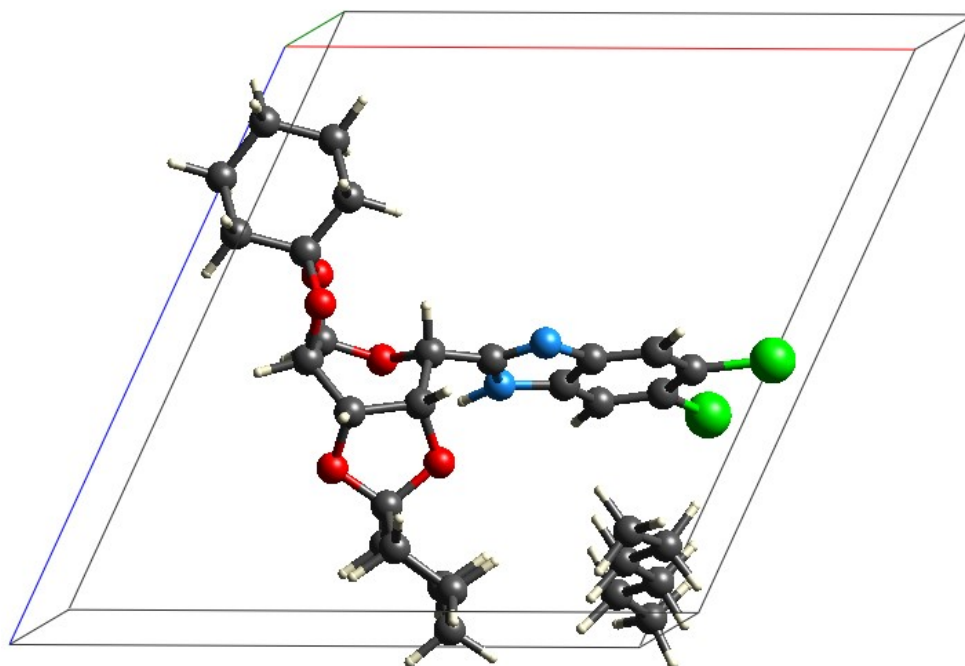

**Figure-S34:** Compound **5b** crystallized with *n*-hexane in unit cell, crystallized with one hexane molecule in unit cell.

|                                   |                                                                               |                  |
|-----------------------------------|-------------------------------------------------------------------------------|------------------|
| Identification code               | UK12A3                                                                        |                  |
| Empirical formula                 | C <sub>24</sub> H <sub>29</sub> Cl <sub>2</sub> N <sub>2</sub> O <sub>5</sub> |                  |
| Formula weight                    | 1163.11                                                                       |                  |
| Temperature                       | 100(2) K                                                                      |                  |
| Wavelength                        | 1.54178 Å                                                                     |                  |
| Crystal system                    | Monoclinic                                                                    |                  |
| Space group                       | P 21                                                                          |                  |
| Unit cell dimensions              | a = 13.3850(7) Å                                                              | α = 90°.         |
|                                   | b = 17.9218(10) Å                                                             | β = 114.647(3)°. |
|                                   | c = 13.9875(8) Å                                                              | γ = 90°.         |
| Volume                            | 3049.7(3) Å <sup>3</sup>                                                      |                  |
| Z                                 | 2                                                                             |                  |
| Density (calculated)              | 1.267 Mg/m <sup>3</sup>                                                       |                  |
| Absorption coefficient            | 2.239 mm <sup>-1</sup>                                                        |                  |
| F(000)                            | 1240                                                                          |                  |
| Crystal size                      | 0.32 x 0.22 x 0.15 mm <sup>3</sup>                                            |                  |
| Theta range for data collection   | 3.476 to 68.243°.                                                             |                  |
| Index ranges                      | -16 ≤ h ≤ 16, -21 ≤ k ≤ 21, -16 ≤ l ≤ 16                                      |                  |
| Reflections collected             | 36114                                                                         |                  |
| Independent reflections           | 11081 [R(int) = 0.2431]                                                       |                  |
| Completeness to theta = 67.679°   | 99.9 %                                                                        |                  |
| Refinement method                 | Full-matrix least-squares on F <sup>2</sup>                                   |                  |
| Data / restraints / parameters    | 11081 / 1 / 714                                                               |                  |
| Goodness-of-fit on F <sup>2</sup> | 0.974                                                                         |                  |
| Final R indices [I > 2σ(I)]       | R1 = 0.0677, wR2 = 0.1269                                                     |                  |
| R indices (all data)              | R1 = 0.1386, wR2 = 0.1545                                                     |                  |
| Absolute structure parameter      | 0.071(17)                                                                     |                  |
| Extinction coefficient            | n/a                                                                           |                  |
| Largest diff. peak and hole       | 0.414 and -0.399 e.Å <sup>-3</sup>                                            |                  |
| CCDC                              | 2296170                                                                       |                  |

**Table S4:** Crystal data and structure refinement for (5b)

File: UK12A3R-FAB Date Run: 07-24-2023 (Time Run: 11:17:46)  
Sample: UMAIR /PROF. DR. SAMMER  
Instrument: JEOL-600H-2  
Inlet: Direct Probe

Run By: HEJ-MASS-LAB

Ionization mode: FAB+

Scan: 3

Base: m/z 185; 18.8%FS TIC: 361440

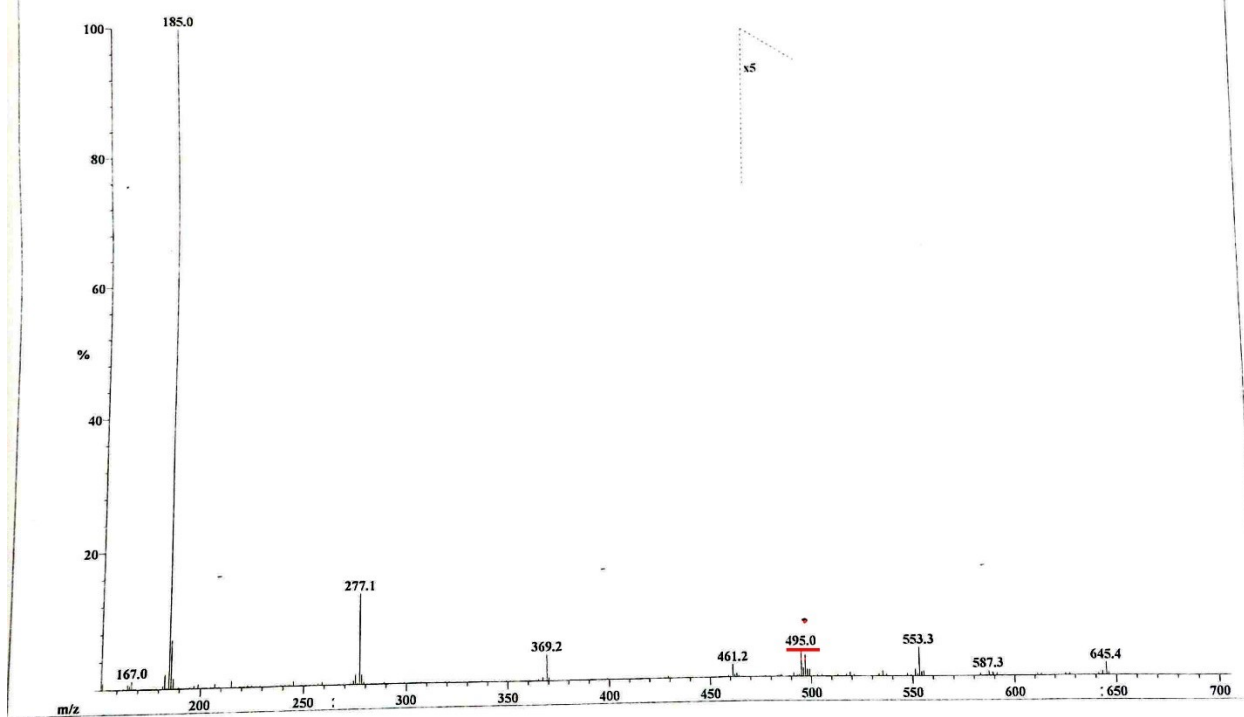

Figure S35: LR-FAB (+ve) shows the m/z value of 495.0 of compound (**5b**)

High resolution FAB positive mode at JEOL HX 110 Mass spectrometer of compound **5b** is 495.1475, while theoretical mass was 495.1454 which corresponds to the composition of  $C_{24}H_{29}N_2O_5Cl_2$ .

9. Spectral properties of 5,6-dibromo-2-(((3a'R,5'R,5a'S,8a'S,8b'R)-tetrahydro-5'H-dispiro[cyclohexane-1,2'-bis([1,3]dioxolo)[4,5-b:4',5'-d]pyran-7',1''-cyclohexan]-5'-yl)-1H-benzo[d]imidazole (6b)

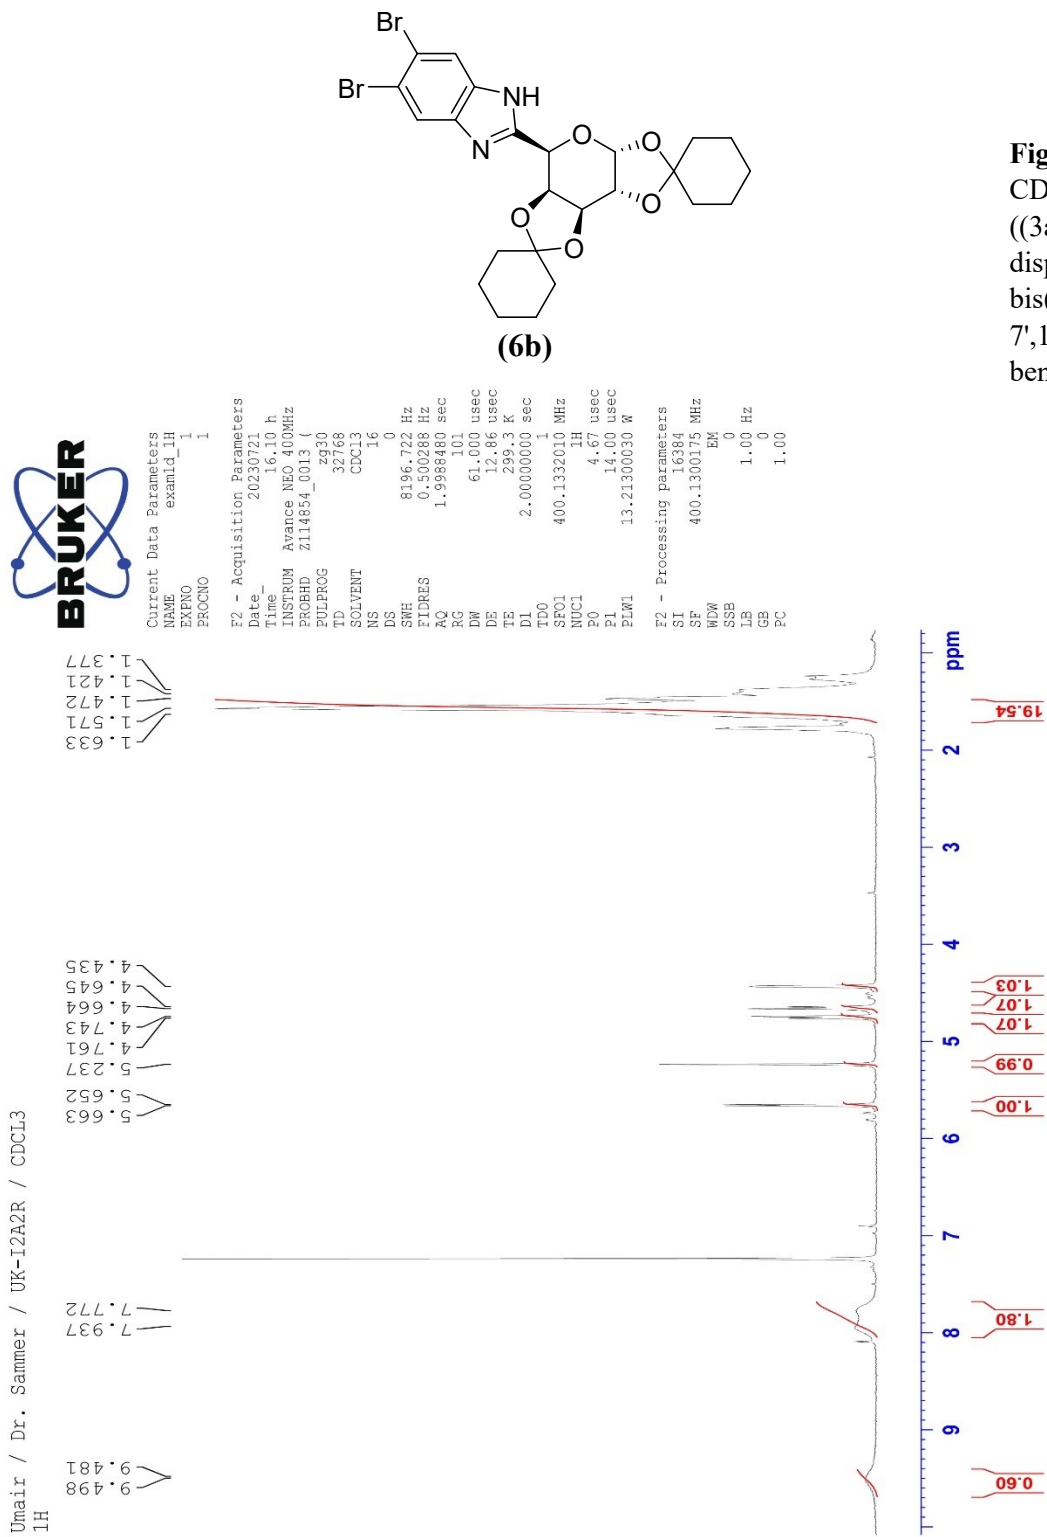

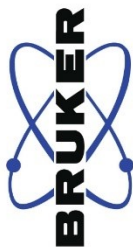

Current Data Parameters  
 NAME examid\_1  
 EXNO 2  
 PROCNO 1

F2 - Acquisition Parameters  
 Date 20230721  
 Time 18.14 h  
 INSTRUM Avance NEO 400MHz  
 PROBHD Z114854.0013 (cosyypgf)  
 PULPROG 2048  
 TD 2048  
 SOLVENT CDCL3  
 NS 16  
 DS 4  
 SWH 4424.779 Hz  
 FIDRES 4.321073 Hz  
 AQ 0.2314240 sec  
 RG 113.000 usec  
 DE 6.50 usec  
 TE 299.0 K  
 DO 0.0000300 sec  
 D1 1.5000000 sec  
 D13 0.0000400 sec  
 D16 0.0002000 sec  
 INO 0.00022600 sec  
 TDel 1  
 SFO1 400.1322007 MHz  
 NUC1 1H  
 P0 14.00 usec  
 F1 14.00 usec  
 F1M1 13.21300030 W  
 GPMAM[1] SMSQ10.100  
 GFZ1 10.00 %  
 F16 1000.00 usec

F1 - Acquisition Parameters  
 TD 256  
 SFO1 400.1322 MHz  
 FIDRES 34.568584 Hz  
 SWH 11.058 ppm  
 F2 - Acquisition Parameters  
 TD 1024  
 SFO1 400.1300175 MHz  
 FIDRES 0 Hz  
 SWH 1.00 Hz  
 F1 - Acquisition Parameters  
 TD 1024  
 SFO1 400.1300175 MHz  
 FIDRES 0 Hz  
 SWH 0 Hz

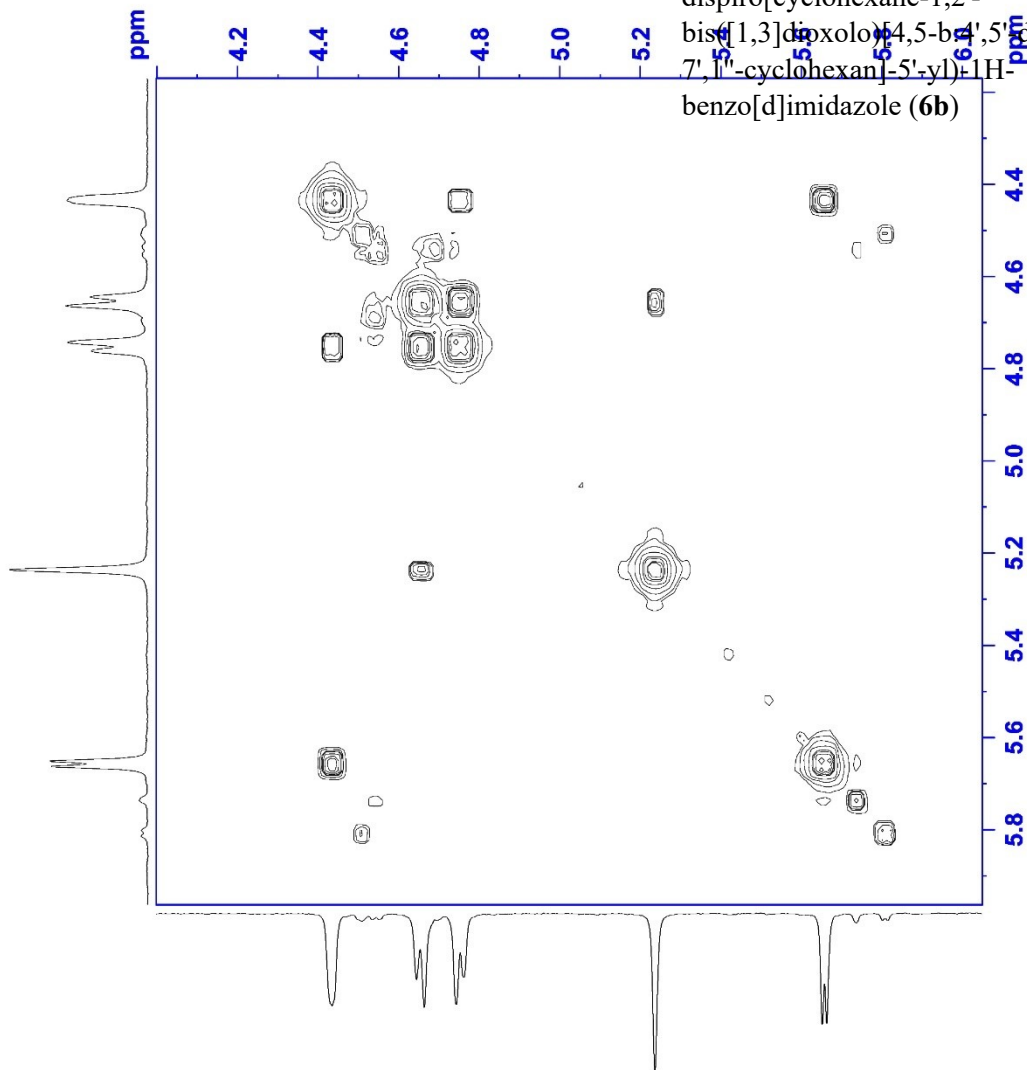

Figure S37: COSY-NMR at 500MHz, in CDCL<sub>3</sub> of compound 5, 6-dibromo-2-((2*a*,*b*,5*R*,5*a*,*S*,8*a*,*S*,8*b*,*R*)-tetrahydro-5*H*-dispiro[cyclohexane-1,2'-bis(1,3)dioxolo[4,5-*b*']pyran-7,1'-cyclohexan]-5'-yl)-1*H*-benzo[*d*]imidazole (6b)

Umair / Dr. Sammer / UK-I2A2R / CDCl3  
BB

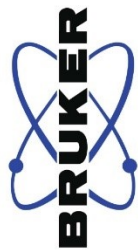

23.56  
23.81  
23.93  
24.88  
24.94  
23.38  
33.38  
34.18  
35.68  
35.82

66.15  
70.21  
70.44  
72.26

96.04  
110.34  
110.19

153.17

Current Data Parameters  
NAME exam1d\_1H  
EXPNO 5  
PROCNO 1

F2 - Acquisition Parameters  
Date\_ 20230722  
Time\_ 22.07 h  
INSTRUM Avance NEO 400MHz  
PROBHD Z114854\_0013 (zpg)  
PULPROG zgpg  
TD 32768  
SOLVENT CDCl3  
NS 16384  
DS 8  
SWH 23809.523 Hz  
FIDRES 1.453218 Hz  
AQ 0.6881280 sec  
RG 101  
DW 21.000 usec  
DE 6.50 usec  
TE 298.5 K  
D1 2.0000000 sec  
D11 0.0300000 sec  
D10 16  
SFO1 100.6243395 MHz  
NUC1 13C  
P1 10.00 usec  
PLW1 56.4300031 W  
SFO2 400.1316005 MHz  
NUC2 1H  
CPDPRG2 waltz65  
PCPD2 90.00 usec  
PLW2 13.21300030 W  
PLW12 0.31972000 W  
PLW13 0.16080999 W

Processing parameters  
SI 32768  
SF 100.6127703 MHz  
WDW EM  
SS 0  
LB 1.00 Hz  
GB 0  
PC 1.40

Figure-S38:  $C^{13}$ -NMR BB at 500 MHz, CDCl<sub>3</sub>, of compound 5, 6-dibromo-((3*a*,*R*,5'*R*,5*a*'*S*,8*a*'*S*,8*b*'*R*)-tetradiSpiro[cyclohexane-1,2'-bis([1,3]dioxolo)[4,5-*b*:4',5'-cyclohexan]-5'-yl)]-1*H*-benzo

(6b)

150 140 130 120 110 100 90 80 70 60 50 ppm 40 30

```

examid_IH 7 1 C:\Bruker\TopSpin3.6.2\examdata
file : 1.682 examid_IH 7 1 C:\Bruker\TopSpin3.6.2\examdata
file : 1.682 examid_IH 6 1 C:\Bruker\TopSpin3.6.2\examdata
file : 0.1768 examid_IH 5 1 C:\Bruker\TopSpin3.6.2\examdata

```

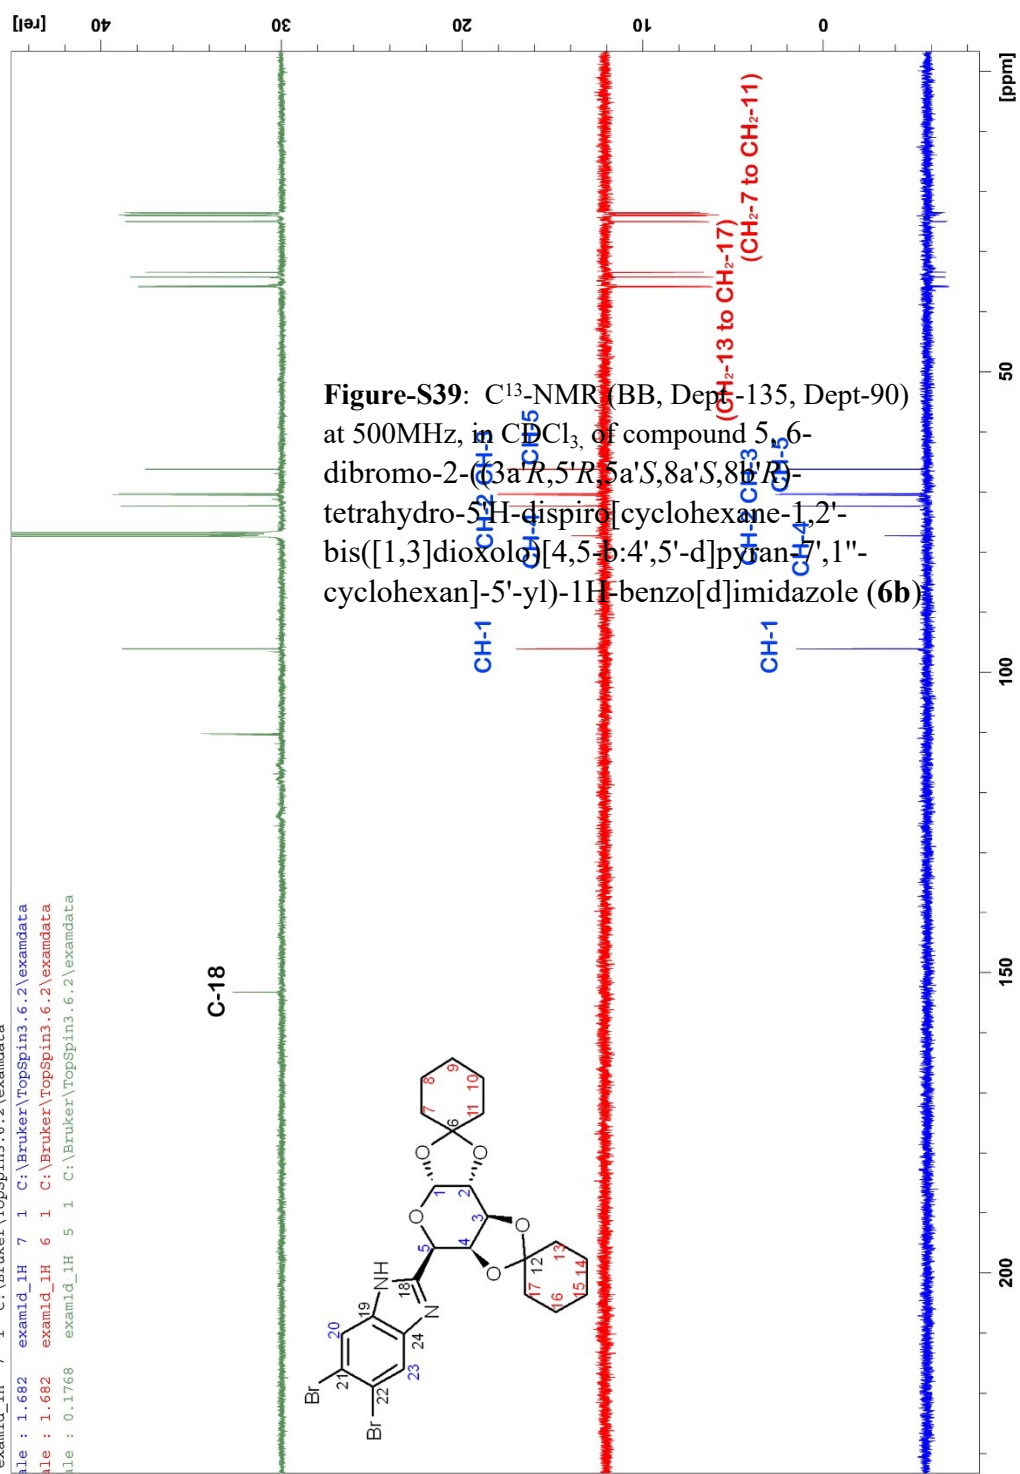



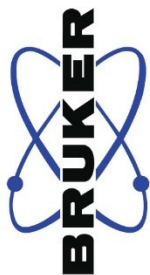

Current Data Parameters  
NAME examid\_1H  
EXPNO 3  
PROCNO 1

F2 - Acquisition Parameters  
Date\_ 20230726  
Time\_ 23:06 h  
INSTRUM Avance NEO 400MHz  
PROBHD Z114854\_0013 (hqcdecetgp  
PULPROG zgpg30  
TD 1024  
SOLVENT CDCl3  
NS 32  
DS 8  
SWH 4424.779 Hz  
FIDRES 8.642146 Hz  
AQ 0.1157120 sec  
RG 327.5  
DM 113.000 usec  
DE 6.50 usec  
TE 298.0 K  
CNST2 145.0000000  
D0 0.0000300 sec  
D1 0.0000300 sec  
D2 0.0000300 sec  
D3 0.00172414 sec  
D4 0.00172414 sec  
D11 0.03000000 sec  
D13 0.03000000 sec  
D16 0.0000400 sec  
D21 0.0002000 sec  
DZ1 0.00345000 sec  
DZ2 0.00002760 sec  
TD0 1  
ZGPGTNS  
SF01 400.1322007 MHz  
NUC1 1H  
F1 14.00 usec  
PC 1.00000000  
P28 1000.00 usec  
PLW1 13.21390030 W  
SF02 100.6215223 MHz  
NUC2 13C  
CPDPRG2 garp  
P4 14.00 usec  
PCPD2 20.00 usec  
PCPD1 80.00 usec  
PLM2 56.4300031 W  
PLM1 0.88172001 W  
GPNAM[1] SMSQ10.100  
GPNAM[2] SMSQ10.100  
GPZ2 20.10 usec  
PL6 1000.00 usec

F1 - Acquisition parameters  
SF01 100.6215 MHz  
FIDRES 141.530792 Hz  
SW 180.040 ppm  
F1MODE Echo-Antiecho  
F2 - Processing parameters  
SI 1024  
SF 400.1300175 MHz  
WDW EM  
SSB 2  
LB 0 Hz  
GB 0  
PC 1.00  
F1 - Processing parameters  
SI 1024  
SF echo-antiecho  
SF 100.6127703 MHz  
WDW EM  
SSB 2  
LB 0 Hz  
GB 0

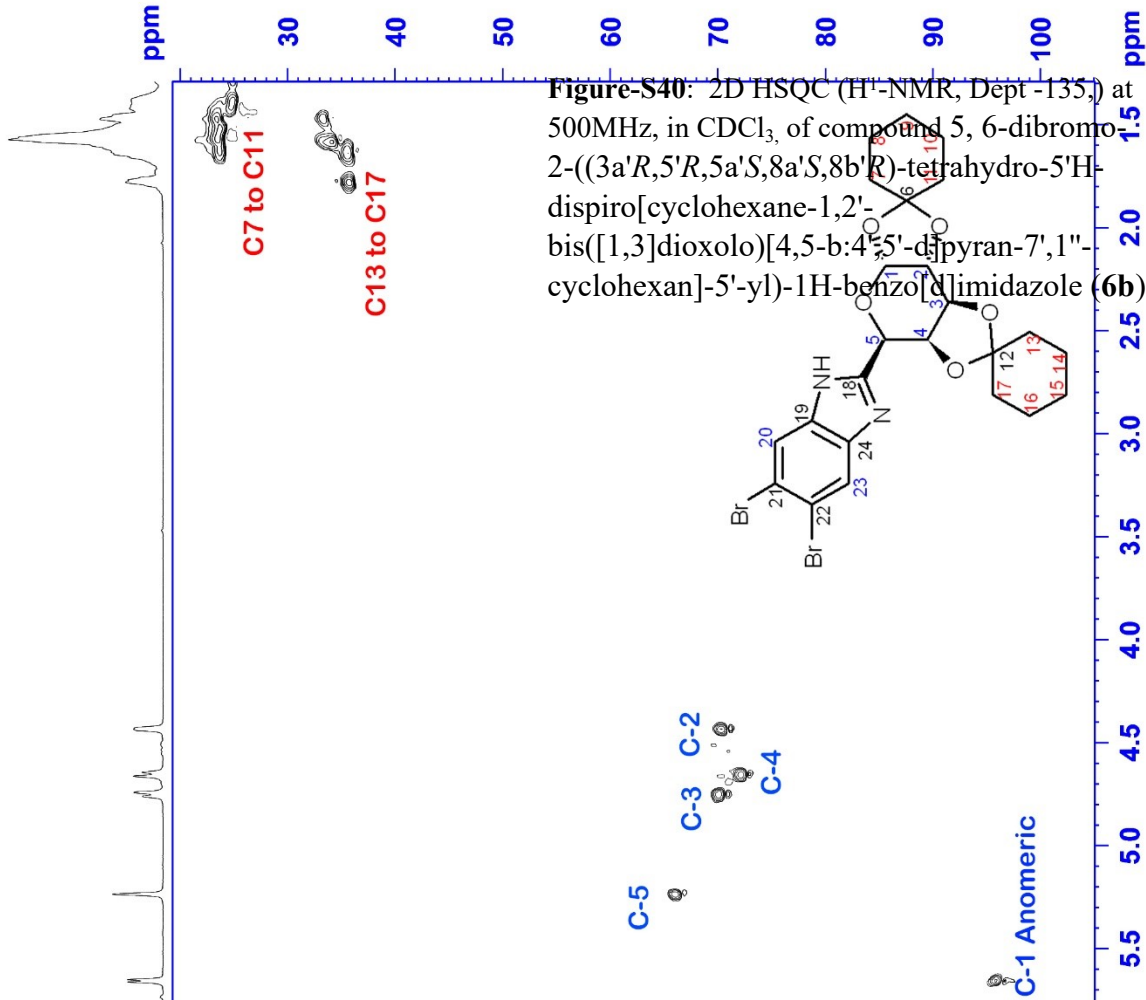

Figure-S40: 2D HSQC ( $^1\text{H}$ -NMR, Dept -135 $^\circ$ ) at 500MHz, in  $\text{CDCl}_3$ , of compound 5, 6-dibromo 2-((3a'R,5'R,5a'S,8a'S,8b'R)-tetrahydro-5'H-dispiro[cyclohexane-1,2'-bis([1,3]dioxolo)[4,5-b:4'5'-d]pyran-7',1''-cyclohexan]-5'-yl)-1H-benzod[imidazole (6b)

- Single Crystal XRD analysis of compound 6b:

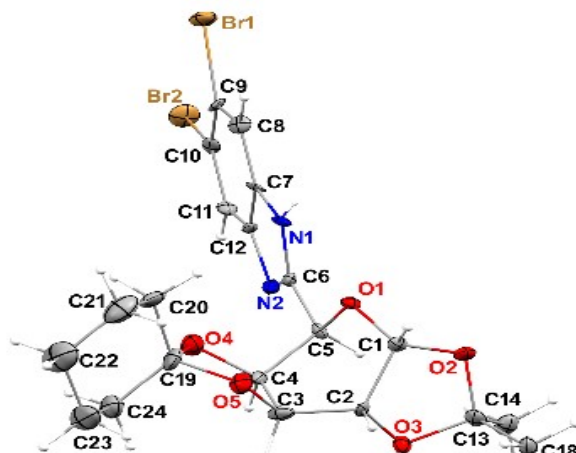

Figure-S41: ORTEP view of compound **6b**.

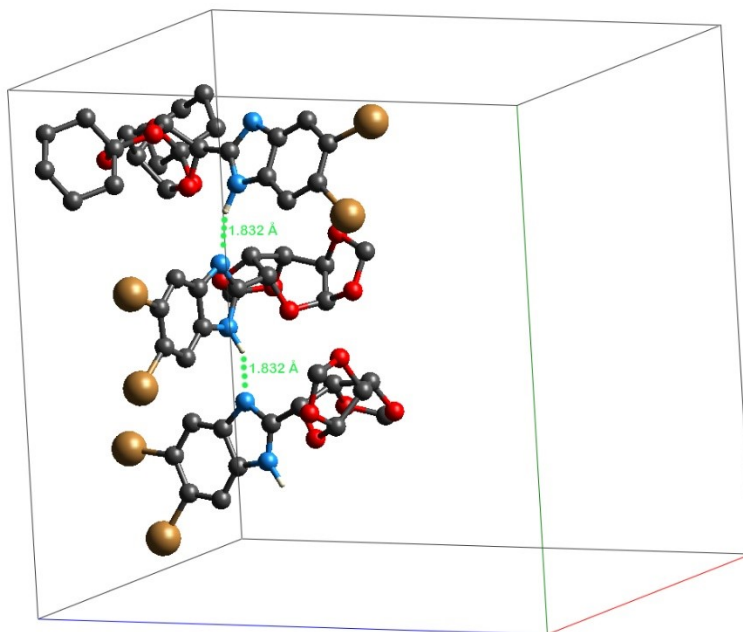

Figure-S42: Compound **6b** hydrogen bonded with a bond length of 1.832 Å in a unit cell.

|                                   |                                                                                |          |
|-----------------------------------|--------------------------------------------------------------------------------|----------|
| Identification code               | UK12A2                                                                         |          |
| Empirical formula                 | C <sub>48</sub> H <sub>53</sub> Br <sub>4</sub> N <sub>4</sub> O <sub>10</sub> |          |
| Formula weight                    | 1165.58                                                                        |          |
| Temperature                       | 100(2) K                                                                       |          |
| Wavelength                        | 1.54178 Å                                                                      |          |
| Crystal system                    | Orthorhombic                                                                   |          |
| Space group                       | P 21 21 21                                                                     |          |
| Unit cell dimensions              | a = 15.5001(5) Å                                                               | α = 90°. |
|                                   | b = 18.3458(6) Å                                                               | β = 90°. |
|                                   | c = 19.5228(6) Å                                                               | γ = 90°. |
| Volume                            | 5551.5(3) Å <sup>3</sup>                                                       |          |
| Z                                 | 4                                                                              |          |
| Density (calculated)              | 1.395 Mg/m <sup>3</sup>                                                        |          |
| Absorption coefficient            | 3.983 mm <sup>-1</sup>                                                         |          |
| F(000)                            | 2356                                                                           |          |
| Crystal size                      | 0.140 x 0.050 x 0.010 mm <sup>3</sup>                                          |          |
| Theta range for data collection   | 3.306 to 68.230°.                                                              |          |
| Index ranges                      | -18<=h<=18, -22<=k<=22, -23<=l<=23                                             |          |
| Reflections collected             | 93810                                                                          |          |
| Independent reflections           | 10156 [R(int) = 0.2207]                                                        |          |
| Completeness to theta = 67.679°   | 100.0 %                                                                        |          |
| Refinement method                 | Full-matrix least-squares on F <sup>2</sup>                                    |          |
| Data / restraints / parameters    | 10156 / 0 / 599                                                                |          |
| Goodness-of-fit on F <sup>2</sup> | 1.077                                                                          |          |
| Final R indices [I>2sigma(I)]     | R1 = 0.0713, wR2 = 0.1882                                                      |          |
| R indices (all data)              | R1 = 0.0941, wR2 = 0.2042                                                      |          |
| Absolute structure parameter      | 0.000(15)                                                                      |          |
| Extinction coefficient            | n/a                                                                            |          |
| Largest diff. peak and hole       | 3.353 and -0.589 e.Å <sup>-3</sup>                                             |          |
| CCDC                              | 2296464                                                                        |          |

**Table S5:** Crystal data and structure refinement for **6b**

**10. 5-bromo-2-((3a'R,5'R,5a'S,8a'S,8b'R)-tetrahydro-5'H-dispiro[cyclohexane-1,2'-bis([1,3]dioxolo)[4,5-b:4',5'-d]pyran-7',1''-cyclohexan]-5'-yl)-1H-benzo[d]imidazole (7b) :**

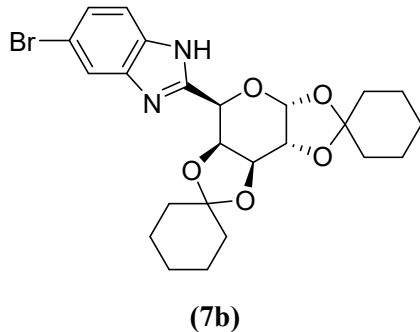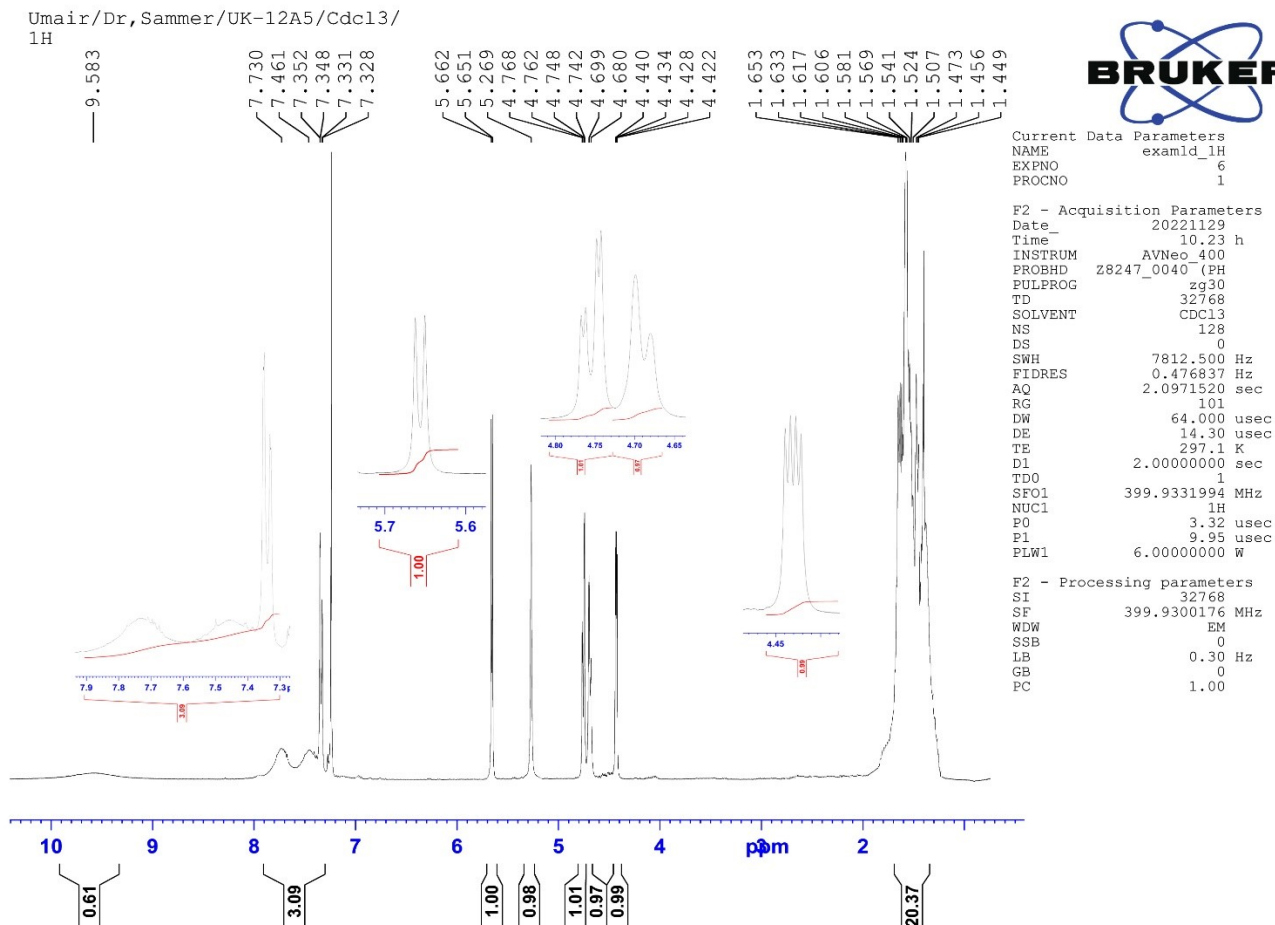

**Figure-S36:**  $^1\text{H-NMR}$ , in  $\text{CDCl}_3$ , of compound 5-bromo-2-((3a'R,5'R,5a'S,8a'S,8b'R)-tetrahydro-5'H-dispiro[cyclohexane-1,2'-bis([1,3]dioxolo)[4,5-b:4',5'-d]pyran-7',1''-cyclohexan]-5'-yl)-1H-benzo[d]imidazole (7b)

- FAB +ve mood low and high resolution of compound 7b

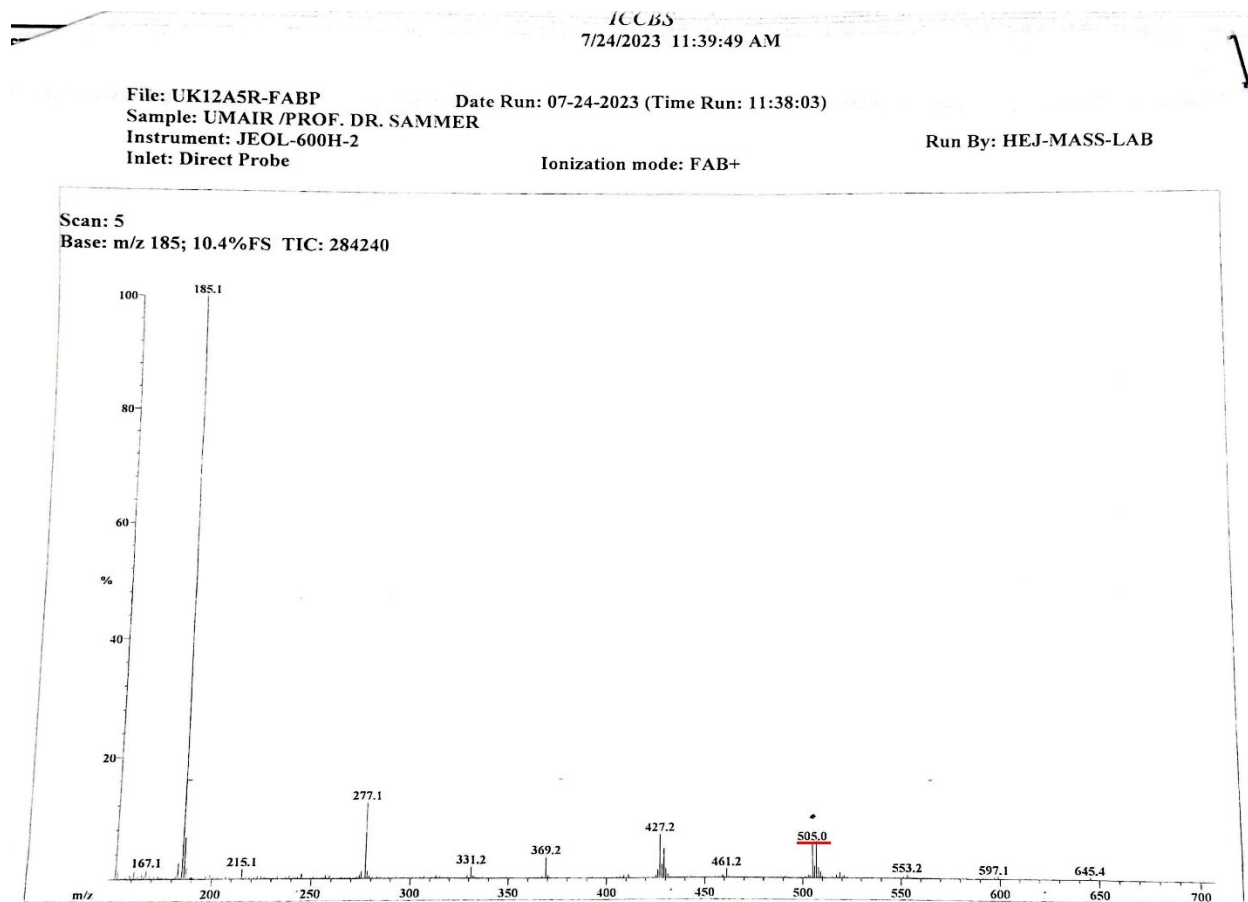

**Figure S37:** LR-FAB (+ve) shows the m/z value of 505.0 of compound (7b)

High resolution FAB positive mode at JEOL HX 110 Mass spectrometer of compound **7b** is **505.1338**, while theoretical mass was 505.1362 which corresponds to the composition of **C<sub>24</sub>H<sub>30</sub>N<sub>2</sub>O<sub>5</sub>Br**.

## UPLC chromatogram of compound 7b

Data File C:\CHEM32\1\DATA\UMAIR\UMAIR 2024-02-13 14-56-21\081-0201.D  
 Sample Name: UK-12A-5

```

=====
Acq. Operator   : junaid                      Seq. Line :    2
Acq. Instrument : UPLC 1                      Location  : Vial 81
Injection Date  : 13/02/2024 3:19:50 pm      Inj       :    1
                                           Inj Volume: 5.000 µl
Sequence File   : C:\Chem32\1\DATA\UMAIR\UMAIR 2024-02-13 14-56-21\UMAIR.S
Method          : C:\CHEM32\1\DATA\UMAIR\UMAIR 2024-02-13 14-56-21\UMAIR.M (Sequence
                  Method)
Last changed    : 13/02/2024 2:56:19 pm by junaid
Method Info     : column: C-4 (4.6 X 250mm) 5 µm 300A MN
  
```

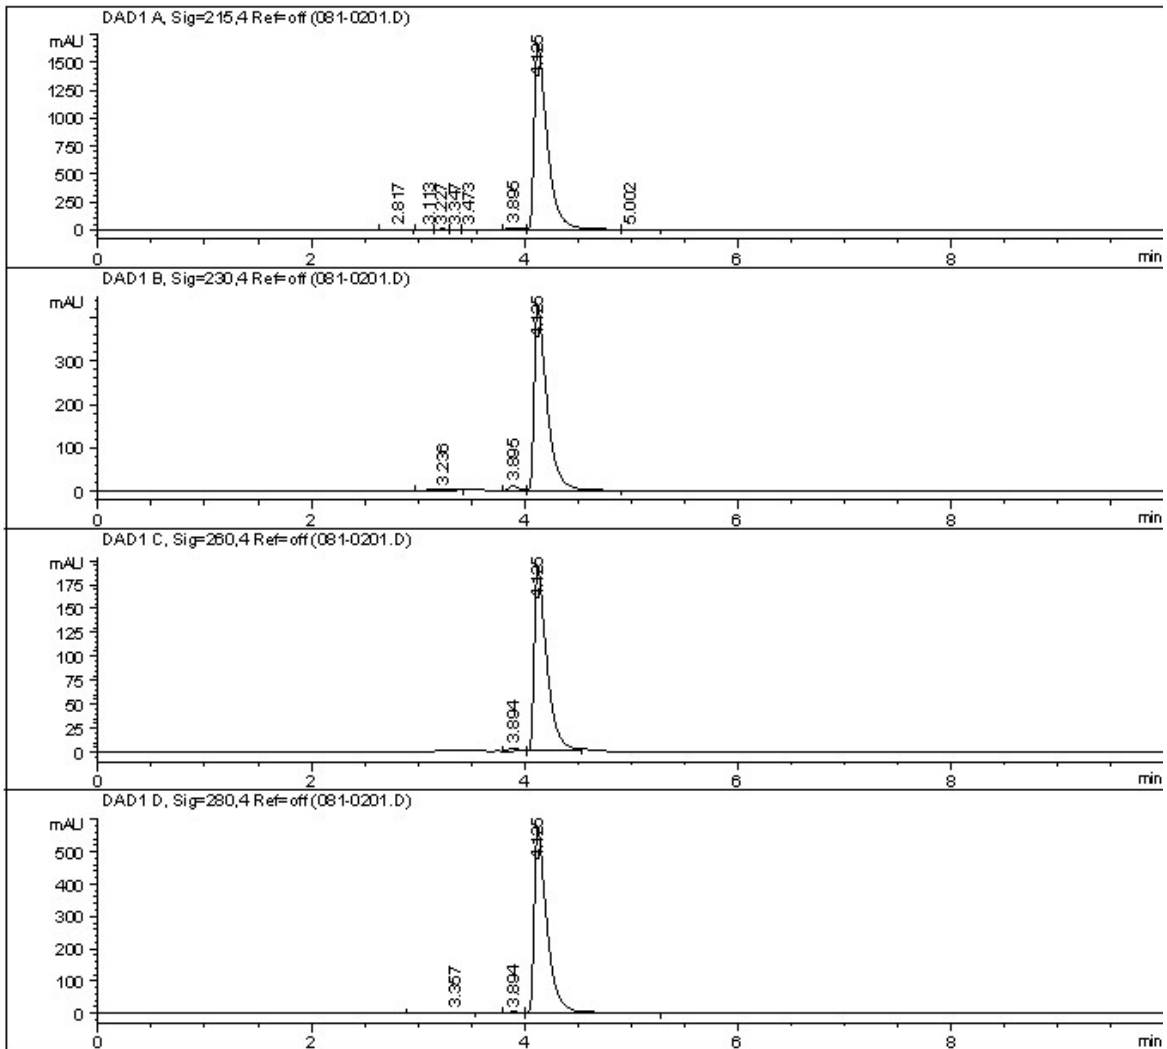

### Area Percent Report with Performance

```

=====
Multiplier:           :      1.0000
Dilution:             :      1.0000
Use Multiplier & Dilution Factor with ISTDs
  
```

Signal 1: DAD1 A, Sig=215,4 Ref=off

| RetTime<br>[min] | k' | Area<br>[mAU*s] | Height<br>[mAU] | Symm. | Width<br>[min] | Plates | Resol<br>ution | Select<br>ivity |
|------------------|----|-----------------|-----------------|-------|----------------|--------|----------------|-----------------|
| 2.817            | -  | 27.24686        | 3.57714         | 0.81  | 0.1076         | 3786   | -              | -               |
| 3.113            | -  | 22.65406        | 3.09987         | 2.35  | 0.1061         | 4767   | 1.63           | 1.11            |
| 3.227            | -  | 23.71906        | 3.42440         | 1.23  | -              | -      | -              | 1.04            |
| 3.347            | -  | 12.06933        | 2.06440         | 1.15  | -              | -      | -              | 1.04            |
| 3.473            | -  | 6.58936         | 1.11123         | 1.70  | -              | -      | -              | 1.04            |
| 3.895            | -  | 106.71966       | 17.55243        | 0.67  | 0.0926         | 9795   | -              | 1.12            |
| 4.125            | -  | 1.41496e4       | 1666.28442      | 0.35  | 0.1235         | 6190   | 1.25           | 1.06            |
| 5.002            | -  | 15.68651        | 1.63637         | 0.70  | 0.1551         | 5759   | 3.70           | 1.21            |

Signal 2: DAD1 B, Sig=230,4 Ref=off

| RetTime<br>[min] | k' | Area<br>[mAU*s] | Height<br>[mAU] | Symm. | Width<br>[min] | Plates | Resol<br>ution | Select<br>ivity |
|------------------|----|-----------------|-----------------|-------|----------------|--------|----------------|-----------------|
| 3.236            | -  | 26.43633        | 1.49282         | 2.00  | 0.3322         | 525    | -              | -               |
| 3.895            | -  | 61.07037        | 10.56910        | 0.72  | 0.0889         | 10628  | 1.84           | 1.20            |
| 4.125            | -  | 3547.29810      | 429.25229       | 0.36  | 0.1202         | 6531   | 1.29           | 1.06            |

Signal 3: DAD1 C, Sig=260,4 Ref=off

| RetTime<br>[min] | k' | Area<br>[mAU*s] | Height<br>[mAU] | Symm. | Width<br>[min] | Plates | Resol<br>ution | Select<br>ivity |
|------------------|----|-----------------|-----------------|-------|----------------|--------|----------------|-----------------|
| 3.894            | -  | 16.64886        | 3.13515         | 0.83  | 0.0852         | 11572  | -              | -               |
| 4.125            | -  | 1547.11841      | 192.96204       | 0.37  | 0.1193         | 6624   | 1.32           | 1.06            |

Signal 4: DAD1 D, Sig=280,4 Ref=off

| RetTime<br>[min] | k' | Area<br>[mAU*s] | Height<br>[mAU] | Symm. | Width<br>[min] | Plates | Resol<br>ution | Select<br>ivity |
|------------------|----|-----------------|-----------------|-------|----------------|--------|----------------|-----------------|
| 3.357            | -  | 19.16838        | 1.02615         | 2.36  | 0.3100         | 648    | -              | -               |
| 3.894            | -  | 20.14855        | 3.67532         | 0.74  | 0.0852         | 11572  | 1.60           | 1.16            |
| 4.125            | -  | 4737.69678      | 575.70844       | 0.36  | 0.1189         | 6669   | 1.33           | 1.06            |

=====  
 \*\*\* End of Report \*\*\*

## UPLC chromatogram of compound 4b

Data File C:\CHEM32\1\DATA\UMAIR\UMAIR 2024-02-13 14-56-21\083-0401.D  
Sample Name: UK-12A-4

```
=====
Acq. Operator   : junaid                      Seq. Line :    4
Acq. Instrument : UPLC 1                     Location  : Vial 83
Injection Date  : 13/02/2024 3:43:32 pm      Inj       :    1
                                           Inj Volume: 5.000 µl
Sequence File   : C:\Chem32\1\DATA\UMAIR\UMAIR 2024-02-13 14-56-21\UMAIR.S
Method          : C:\CHEM32\1\DATA\UMAIR\UMAIR 2024-02-13 14-56-21\UMAIR.M (Sequence
Method)
Last changed    : 13/02/2024 2:56:19 pm by junaid
Method Info     : column: C-4 (4.6 X 250mm) 5 µm 300A MN
=====
```

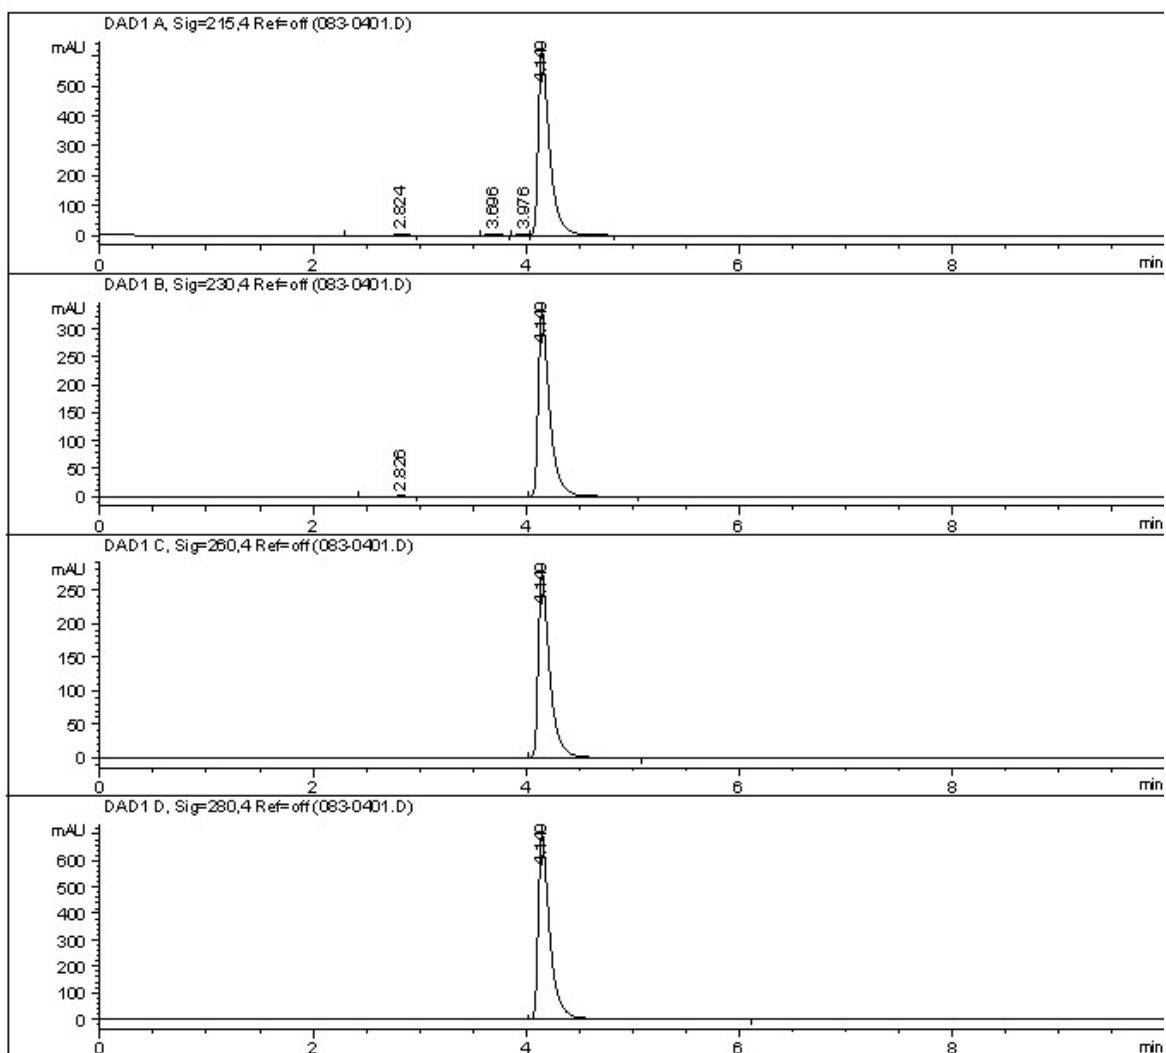

### Area Percent Report with Performance

```
=====
Multiplier:           :      1.0000
Dilution:             :      1.0000
Use Multiplier & Dilution Factor with ISTDs
=====
```



Data File C:\CHEM32\1\DATA\UMAIR\UMAIR 2024-02-13 14-56-21\083-0401.D  
Sample Name: UK-12A-4

Signal 1: DAD1 A, Sig=215,4 Ref=off

| RetTime<br>[min] | k' | Area<br>[mAU*s] | Height<br>[mAU] | Symm. | Width<br>[min] | Plates | Resol<br>ution | Select<br>ivity |
|------------------|----|-----------------|-----------------|-------|----------------|--------|----------------|-----------------|
| 2.824            | -  | 42.40036        | 4.24094         | 1.45  | 0.1133         | 3446   | -              | -               |
| 3.696            | -  | 21.82827        | 3.42733         | 0.89  | 0.0983         | 7815   | 4.84           | 1.31            |
| 3.976            | -  | 21.88741        | 3.79497         | 1.12  | 0.0995         | 8837   | 1.66           | 1.08            |
| 4.149            | -  | 4616.23145      | 623.58173       | 0.44  | 0.1059         | 8494   | 0.99           | 1.04            |

Signal 2: DAD1 B, Sig=230,4 Ref=off

| RetTime<br>[min] | k' | Area<br>[mAU*s] | Height<br>[mAU] | Symm. | Width<br>[min] | Plates | Resol<br>ution | Select<br>ivity |
|------------------|----|-----------------|-----------------|-------|----------------|--------|----------------|-----------------|
| 2.826            | -  | 9.74197         | 1.08728         | 1.19  | 0.1133         | 3446   | -              | -               |
| 4.149            | -  | 2469.94141      | 333.21481       | 0.43  | 0.1057         | 8529   | 7.10           | 1.47            |

Signal 3: DAD1 C, Sig=260,4 Ref=off

| RetTime<br>[min] | k' | Area<br>[mAU*s] | Height<br>[mAU] | Symm. | Width<br>[min] | Plates | Resol<br>ution | Select<br>ivity |
|------------------|----|-----------------|-----------------|-------|----------------|--------|----------------|-----------------|
| 4.149            | -  | 2058.89551      | 277.60541       | 0.43  | 0.1058         | 8507   | -              | -               |

Signal 4: DAD1 D, Sig=280,4 Ref=off

| RetTime<br>[min] | k' | Area<br>[mAU*s] | Height<br>[mAU] | Symm. | Width<br>[min] | Plates | Resol<br>ution | Select<br>ivity |
|------------------|----|-----------------|-----------------|-------|----------------|--------|----------------|-----------------|
| 4.149            | -  | 5274.24707      | 706.34021       | 0.43  | 0.1061         | 8468   | -              | -               |

=====  
\*\*\* End of Report \*\*\*

# UPLC chromatogram of compound 5b

Data File C:\CHEM32\1\DATA\UMAIR\UMAIR 2024-02-13 14-56-21\084-0501.D  
Sample Name: UK-12A-3

```
=====
Acq. Operator   : junaid                      Seq. Line :    5
Acq. Instrument : UPLC 1                      Location  : Vial 84
Injection Date  : 13/02/2024 3:55:25 pm      Inj       :    1
                                           Inj Volume: 5.000 µl
Sequence File   : C:\Chem32\1\DATA\UMAIR\UMAIR 2024-02-13 14-56-21\UMAIR.S
Method          : C:\CHEM32\1\DATA\UMAIR\UMAIR 2024-02-13 14-56-21\UMAIR.M (Sequence
                  Method)
Last changed    : 13/02/2024 2:56:19 pm by junaid
Method Info     : column: C-4 (4.6 X 250mm) 5 µm 300A MN
=====
```

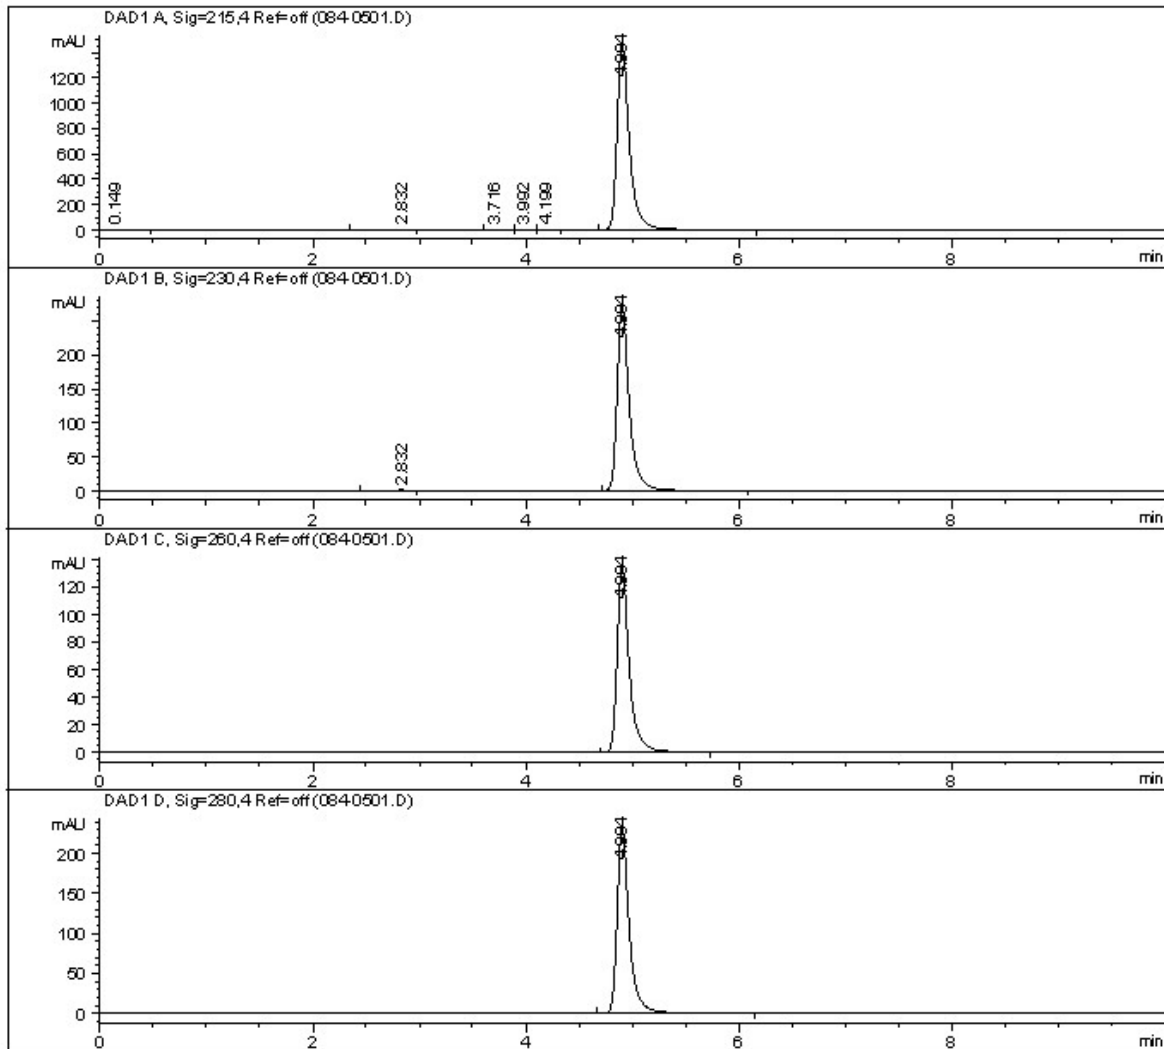

## Area Percent Report with Performance

```
=====
Multiplier:      :      1.0000
Dilution:        :      1.0000
Use Multiplier & Dilution Factor with ISTDs
=====
```

Signal 1: DAD1 A, Sig=215,4 Ref=off

| RetTime<br>[min] | k' | Area<br>[mAU*s] | Height<br>[mAU] | Symm. | Width<br>[min] | Plates | Resol<br>ution | Select<br>ivity |
|------------------|----|-----------------|-----------------|-------|----------------|--------|----------------|-----------------|
| 0.149            | -  | 16.68434        | 1.14176         | 0.67  | 0.2367         | 2      | -              | -               |
| 2.832            | -  | 35.10935        | 4.42344         | 1.25  | 0.0983         | 4599   | 9.41           | 19.07           |
| 3.716            | -  | 16.69746        | 2.59213         | 0.63  | 0.0914         | 9138   | 5.48           | 1.31            |
| 3.992            | -  | 11.49987        | 1.79916         | 0.76  | 0.0944         | 9904   | 1.74           | 1.07            |
| 4.199            | -  | 10.46346        | 1.53487         | 1.10  | 0.1057         | 8745   | 1.21           | 1.05            |
| 4.904            | -  | 1.18122e4       | 1472.91748      | 0.61  | 0.1140         | 10255  | 3.77           | 1.17            |

Signal 2: DAD1 B, Sig=230,4 Ref=off

| RetTime<br>[min] | k' | Area<br>[mAU*s] | Height<br>[mAU] | Symm. | Width<br>[min] | Plates | Resol<br>ution | Select<br>ivity |
|------------------|----|-----------------|-----------------|-------|----------------|--------|----------------|-----------------|
| 2.832            | -  | 8.44363         | 1.08245         | 1.20  | 0.1975         | 1140   | -              | -               |
| 4.904            | -  | 2162.31494      | 273.87820       | 0.62  | 0.1120         | 10640  | 7.87           | 1.73            |

Signal 3: DAD1 C, Sig=260,4 Ref=off

| RetTime<br>[min] | k' | Area<br>[mAU*s] | Height<br>[mAU] | Symm. | Width<br>[min] | Plates | Resol<br>ution | Select<br>ivity |
|------------------|----|-----------------|-----------------|-------|----------------|--------|----------------|-----------------|
| 4.904            | -  | 1057.20068      | 135.24602       | 0.62  | 0.1109         | 10838  | -              | -               |

Signal 4: DAD1 D, Sig=280,4 Ref=off

| RetTime<br>[min] | k' | Area<br>[mAU*s] | Height<br>[mAU] | Symm. | Width<br>[min] | Plates | Resol<br>ution | Select<br>ivity |
|------------------|----|-----------------|-----------------|-------|----------------|--------|----------------|-----------------|
| 4.904            | -  | 1829.39355      | 233.40300       | 0.62  | 0.1109         | 10844  | -              | -               |

=====  
\*\*\* End of Report \*\*\*

# UPLC chromatogram of compound 6b

Data File C:\CHEM32\1\DATA\UMAIR\UMAIR 2024-02-13 14-56-21\086-0701.D  
Sample Name: UK-GACDB

```
=====
Acq. Operator   : junaid                      Seq. Line :    7
Acq. Instrument : UPLC 1                      Location  : Vial 86
Injection Date  : 13/02/2024 4:19:10 pm      Inj       :    1
                                           Inj Volume: 5.000 µl
Sequence File   : C:\Chem32\1\DATA\UMAIR\UMAIR 2024-02-13 14-56-21\UMAIR.S
Method          : C:\CHEM32\1\DATA\UMAIR\UMAIR 2024-02-13 14-56-21\UMAIR.M (Sequence
Method)
Last changed   : 13/02/2024 2:56:19 pm by junaid
Method Info    : column: C-4 (4.6 X 250mm) 5 µm 300A MN
=====
```

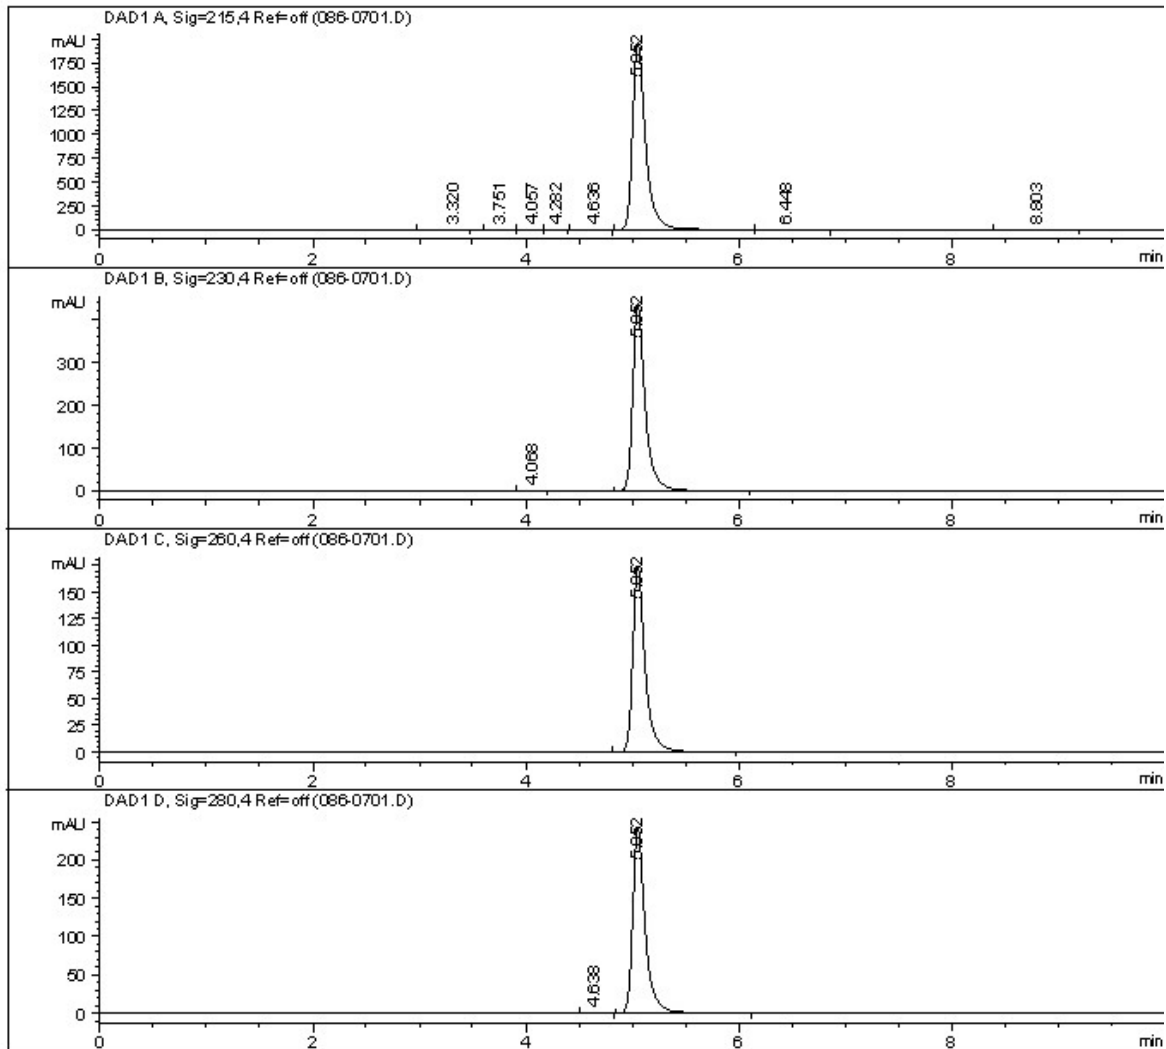

## Area Percent Report with Performance

```
=====
Multiplier:      :      1.0000
Dilution:        :      1.0000
Use Multiplier & Dilution Factor with ISTDs
=====
```

Signal 1: DAD1 A, Sig=215,4 Ref=off

| RetTime<br>[min] | k' | Area<br>[mAU*s] | Height<br>[mAU] | Symm. | Width<br>[min] | Plates | Resol<br>ution | Select<br>ivity |
|------------------|----|-----------------|-----------------|-------|----------------|--------|----------------|-----------------|
| 3.320            | -  | 31.57682        | 1.51030         | 4.45  | 0.3017         | 671    | -              | -               |
| 3.751            | -  | 13.58976        | 1.83765         | 0.64  | 0.1057         | 6984   | 1.24           | 1.13            |
| 4.057            | -  | 21.92994        | 2.33251         | 1.54  | 0.1527         | 3905   | 1.39           | 1.08            |
| 4.282            | -  | 8.10556         | 1.08677         | 1.40  | 0.1297         | 6033   | 0.94           | 1.06            |
| 4.636            | -  | 24.56827        | 3.42490         | 0.94  | 0.1029         | 11242  | 1.79           | 1.08            |
| 5.052            | -  | 1.67492e4       | 1956.52368      | 0.62  | 0.1226         | 9408   | 2.17           | 1.09            |
| 6.448            | -  | 21.08078        | 1.73713         | 0.87  | 0.1600         | 8994   | 5.80           | 1.28            |
| 8.803            | -  | 26.10264        | 1.51557         | 1.07  | 0.2622         | 6239   | 6.55           | 1.37            |

Signal 2: DAD1 B, Sig=230,4 Ref=off

| RetTime<br>[min] | k' | Area<br>[mAU*s] | Height<br>[mAU] | Symm. | Width<br>[min] | Plates | Resol<br>ution | Select<br>ivity |
|------------------|----|-----------------|-----------------|-------|----------------|--------|----------------|-----------------|
| 4.068            | -  | 7.43790         | 1.04434         | 1.46  | 0.1167         | 6731   | -              | -               |
| 5.052            | -  | 3525.97095      | 433.83145       | 0.62  | 0.1152         | 10660  | 4.99           | 1.24            |

Signal 3: DAD1 C, Sig=260,4 Ref=off

| RetTime<br>[min] | k' | Area<br>[mAU*s] | Height<br>[mAU] | Symm. | Width<br>[min] | Plates | Resol<br>ution | Select<br>ivity |
|------------------|----|-----------------|-----------------|-------|----------------|--------|----------------|-----------------|
| 5.052            | -  | 1407.99158      | 174.68004       | 0.63  | 0.1142         | 10845  | -              | -               |

Signal 4: DAD1 D, Sig=280,4 Ref=off

| RetTime<br>[min] | k' | Area<br>[mAU*s] | Height<br>[mAU] | Symm. | Width<br>[min] | Plates | Resol<br>ution | Select<br>ivity |
|------------------|----|-----------------|-----------------|-------|----------------|--------|----------------|-----------------|
| 4.638            | -  | 6.87752         | 1.05156         | 0.79  | 0.0990         | 12158  | -              | -               |
| 5.052            | -  | 1962.68347      | 243.15976       | 0.63  | 0.1144         | 10815  | 2.28           | 1.09            |

\*\*\* End of Report \*\*\*

## UPLC chromatogram of compound 3a

Data File C:\CHEM32\1\DATA\UMAIR\UMAIR 2024-02-13 14-56-21\087-0801.D  
 Sample Name: UK-GALH

```

=====
Acq. Operator   : junaid                      Seq. Line :    8
Acq. Instrument : UPLC 1                      Location  : Vial 87
Injection Date  : 13/02/2024 4:31:03 pm      Inj       :    1
                                           Inj Volume: 5.000 µl
Sequence File   : C:\Chem32\1\DATA\UMAIR\UMAIR 2024-02-13 14-56-21\UMAIR.S
Method          : C:\CHEM32\1\DATA\UMAIR\UMAIR 2024-02-13 14-56-21\UMAIR.M (Sequence
                  Method)
Last changed    : 13/02/2024 2:56:19 pm by junaid
Method Info     : column: C-4 (4.6 X 250mm) 5 µm 300A MN
  
```

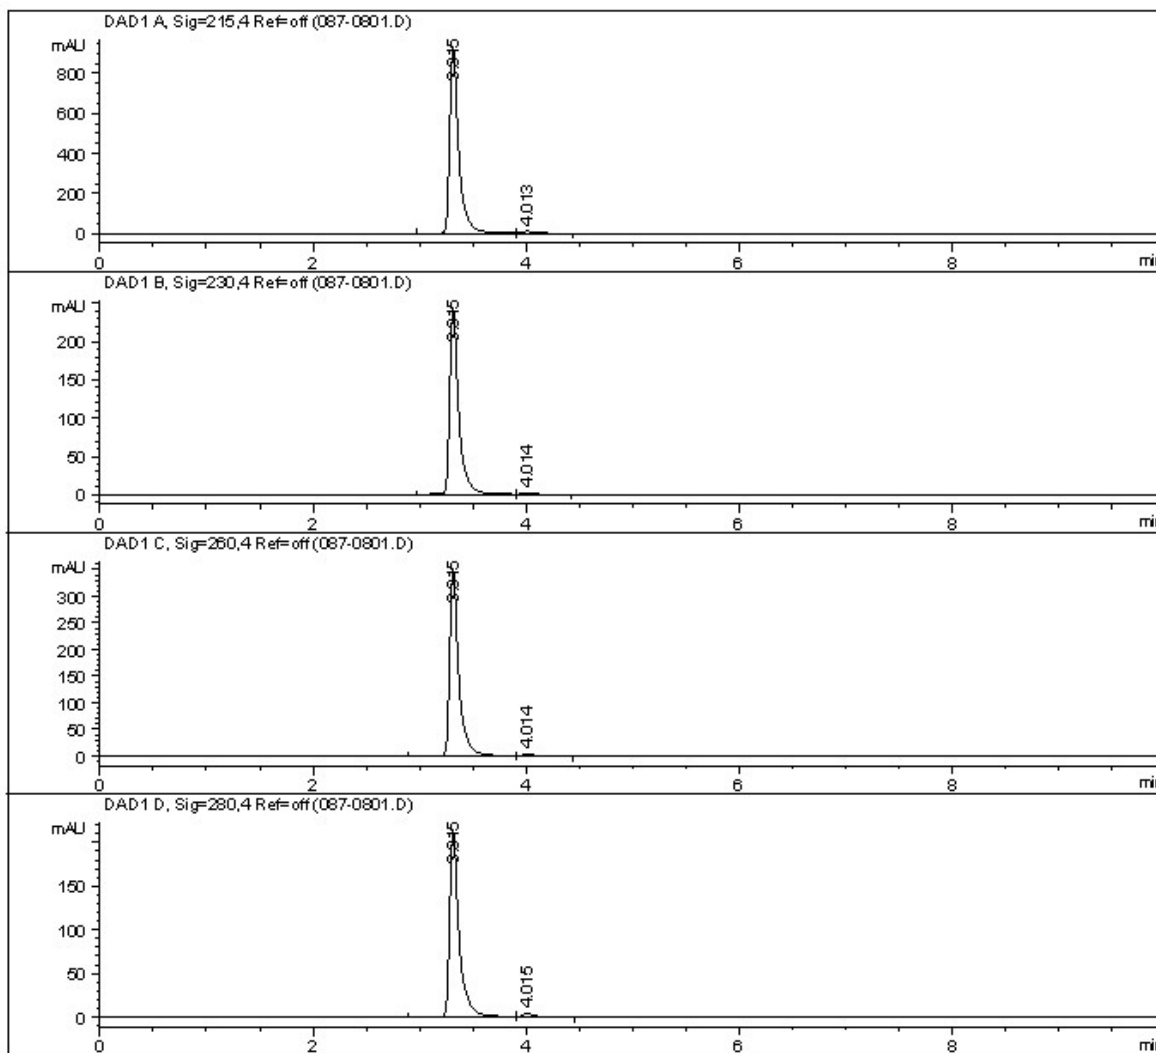

### Area Percent Report with Performance

```

=====
Multiplier:      :      1.0000
Dilution:        :      1.0000
Use Multiplier & Dilution Factor with ISTDs
  
```

Signal 1: DAD1 A, Sig=215,4 Ref=off

| RetTime<br>[min] | k' | Area<br>[mAU*s] | Height<br>[mAU] | Symm. | Width<br>[min] | Plates | Resol<br>ution | Select<br>ivity |
|------------------|----|-----------------|-----------------|-------|----------------|--------|----------------|-----------------|
| 3.315            | -  | 5585.14697      | 931.62054       | 0.53  | 0.0818         | 9093   | -              | -               |
| 4.013            | -  | 97.37994        | 11.36841        | 0.60  | 0.1073         | 7752   | 4.34           | 1.21            |

Signal 2: DAD1 B, Sig=230,4 Ref=off

| RetTime<br>[min] | k' | Area<br>[mAU*s] | Height<br>[mAU] | Symm. | Width<br>[min] | Plates | Resol<br>ution | Select<br>ivity |
|------------------|----|-----------------|-----------------|-------|----------------|--------|----------------|-----------------|
| 3.315            | -  | 1463.15112      | 243.15395       | 0.54  | 0.0816         | 9124   | -              | -               |
| 4.014            | -  | 24.47080        | 2.81728         | 0.62  | 0.1111         | 7228   | 4.26           | 1.21            |

Signal 3: DAD1 C, Sig=260,4 Ref=off

| RetTime<br>[min] | k' | Area<br>[mAU*s] | Height<br>[mAU] | Symm. | Width<br>[min] | Plates | Resol<br>ution | Select<br>ivity |
|------------------|----|-----------------|-----------------|-------|----------------|--------|----------------|-----------------|
| 3.315            | -  | 2071.30249      | 350.07733       | 0.53  | 0.0814         | 9182   | -              | -               |
| 4.014            | -  | 29.21347        | 3.90823         | 0.68  | 0.1000         | 8923   | 4.53           | 1.21            |

Signal 4: DAD1 D, Sig=280,4 Ref=off

| RetTime<br>[min] | k' | Area<br>[mAU*s] | Height<br>[mAU] | Symm. | Width<br>[min] | Plates | Resol<br>ution | Select<br>ivity |
|------------------|----|-----------------|-----------------|-------|----------------|--------|----------------|-----------------|
| 3.315            | -  | 1324.80798      | 213.58643       | 0.51  | 0.0840         | 8626   | -              | -               |
| 4.015            | -  | 30.22739        | 4.01984         | 0.65  | 0.0987         | 9169   | 4.50           | 1.21            |

=====  
\*\*\* End of Report \*\*\*

# UPLC chromatogram of compound 4a

Data File C:\CHEM32\1\DATA\UMAIR\UMAIR 2024-02-12 15-47-36\001-0201.D  
Sample Name: UKG-ALF2

```
=====
Acq. Operator   : junaid                      Seq. Line :    2
Acq. Instrument : UPLC 1                     Location  : Vial 1
Injection Date  : 12/02/2024 3:59:50 pm      Inj       :    1
                                                Inj Volume: 5.000 µl
Sequence File   : C:\Chem32\1\DATA\UMAIR\UMAIR 2024-02-12 15-47-36\UMAIR.S
Method          : C:\CHEM32\1\DATA\UMAIR\UMAIR 2024-02-12 15-47-36\UMAIR.M (Sequence
                  Method)
Last changed    : 12/02/2024 3:47:29 pm by junaid
Method Info     : column: C-4 (4.6 X 250mm) 5 µm 300A MN
=====
```

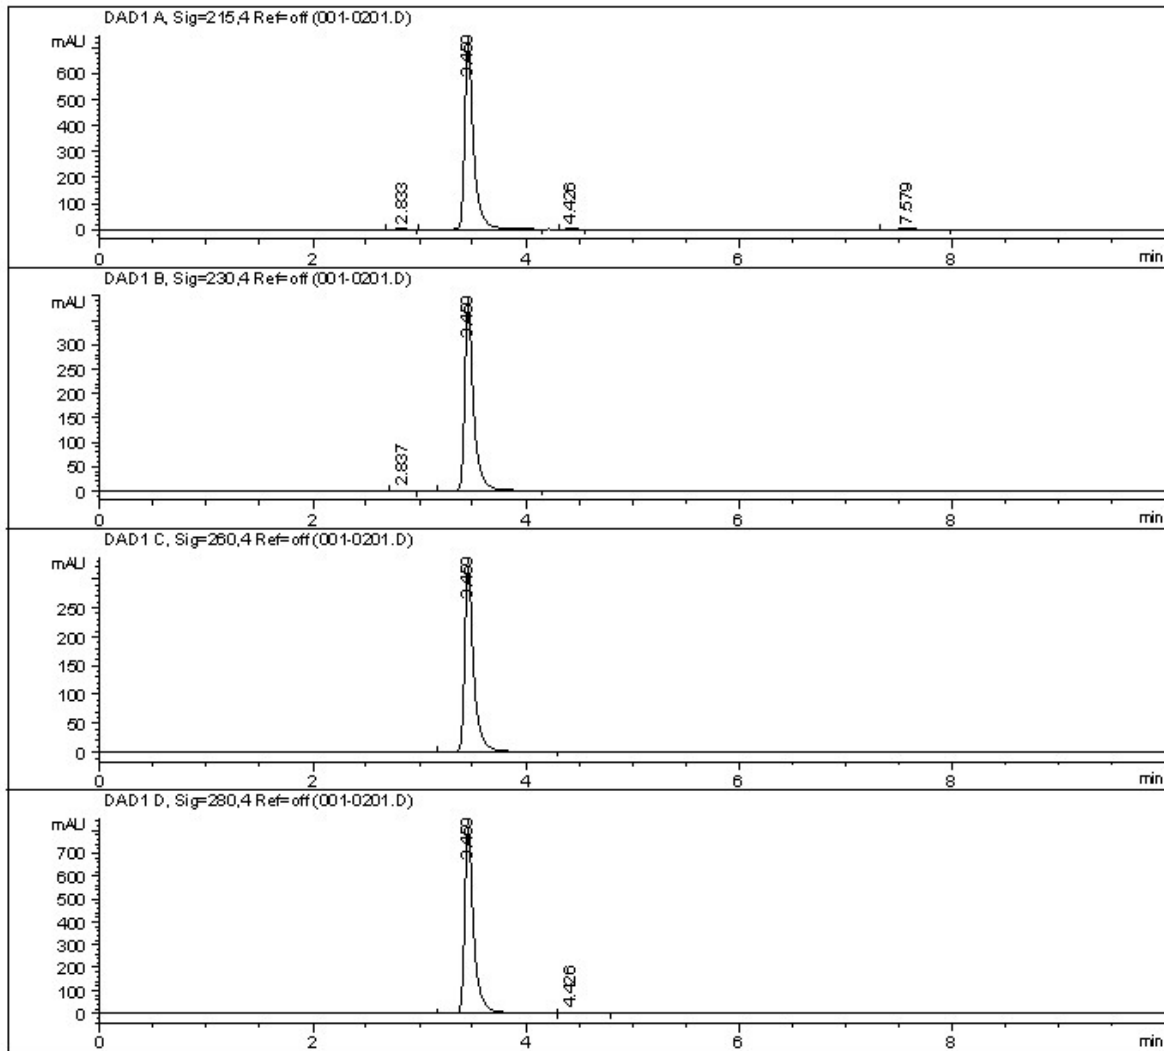

## Area Percent Report with Performance

```
=====
Multiplier:           :      1.0000
Dilution:             :      1.0000
Use Multiplier & Dilution Factor with ISTDs
=====
```



Signal 1: DAD1 A, Sig=215,4 Ref=off

| RetTime<br>[min] | k' | Area<br>[mAU*s] | Height<br>[mAU] | Symm. | Width<br>[min] | Plates | Resol<br>ution | Select<br>ivity |
|------------------|----|-----------------|-----------------|-------|----------------|--------|----------------|-----------------|
| 2.833            | -  | 27.59914        | 3.92927         | 0.73  | 0.1017         | 4303   | -              | -               |
| 3.459            | -  | 4310.45410      | 716.11633       | 0.57  | 0.0828         | 9668   | 3.98           | 1.22            |
| 4.426            | -  | 11.62718        | 1.82169         | 1.01  | 0.0989         | 11101  | 6.25           | 1.28            |
| 7.579            | -  | 19.86694        | 1.71173         | 0.88  | 0.1778         | 10071  | 13.39          | 1.71            |

Signal 2: DAD1 B, Sig=230,4 Ref=off

| RetTime<br>[min] | k' | Area<br>[mAU*s] | Height<br>[mAU] | Symm. | Width<br>[min] | Plates | Resol<br>ution | Select<br>ivity |
|------------------|----|-----------------|-----------------|-------|----------------|--------|----------------|-----------------|
| 2.837            | -  | 6.65760         | 1.00267         | 0.73  | 0.1011         | 4350   | -              | -               |
| 3.459            | -  | 2252.34741      | 381.79037       | 0.57  | 0.0829         | 9655   | 3.97           | 1.22            |

Signal 3: DAD1 C, Sig=260,4 Ref=off

| RetTime<br>[min] | k' | Area<br>[mAU*s] | Height<br>[mAU] | Symm. | Width<br>[min] | Plates | Resol<br>ution | Select<br>ivity |
|------------------|----|-----------------|-----------------|-------|----------------|--------|----------------|-----------------|
| 3.459            | -  | 1904.16602      | 321.97821       | 0.56  | 0.0831         | 9610   | -              | -               |

Signal 4: DAD1 D, Sig=280,4 Ref=off

| RetTime<br>[min] | k' | Area<br>[mAU*s] | Height<br>[mAU] | Symm. | Width<br>[min] | Plates | Resol<br>ution | Select<br>ivity |
|------------------|----|-----------------|-----------------|-------|----------------|--------|----------------|-----------------|
| 3.459            | -  | 4816.05811      | 813.93890       | 0.56  | 0.0830         | 9631   | -              | -               |
| 4.426            | -  | 14.36475        | 1.91712         | 0.74  | 0.1044         | 9952   | 6.06           | 1.28            |

=====  
\*\*\* End of Report \*\*\*

# UPLC chromatogram of compound 5a

Data File C:\CHEM32\1\DATA\UMAIR\UMAIR 2024-02-13 14-56-21\085-0601.D  
Sample Name: UK-GACL-2

```
=====
Acq. Operator   : junaid                      Seq. Line :    6
Acq. Instrument : UPLC 1                     Location  : Vial 85
Injection Date  : 13/02/2024 4:07:17 pm      Inj       :    1
                                           Inj Volume: 5.000 µl
Sequence File   : C:\Chem32\1\DATA\UMAIR\UMAIR 2024-02-13 14-56-21\UMAIR.S
Method          : C:\CHEM32\1\DATA\UMAIR\UMAIR 2024-02-13 14-56-21\UMAIR.M (Sequence
Method)
Last changed   : 13/02/2024 2:56:19 pm by junaid
Method Info    : column: C-4 (4.6 X 250mm) 5 µm 300A MN
=====
```

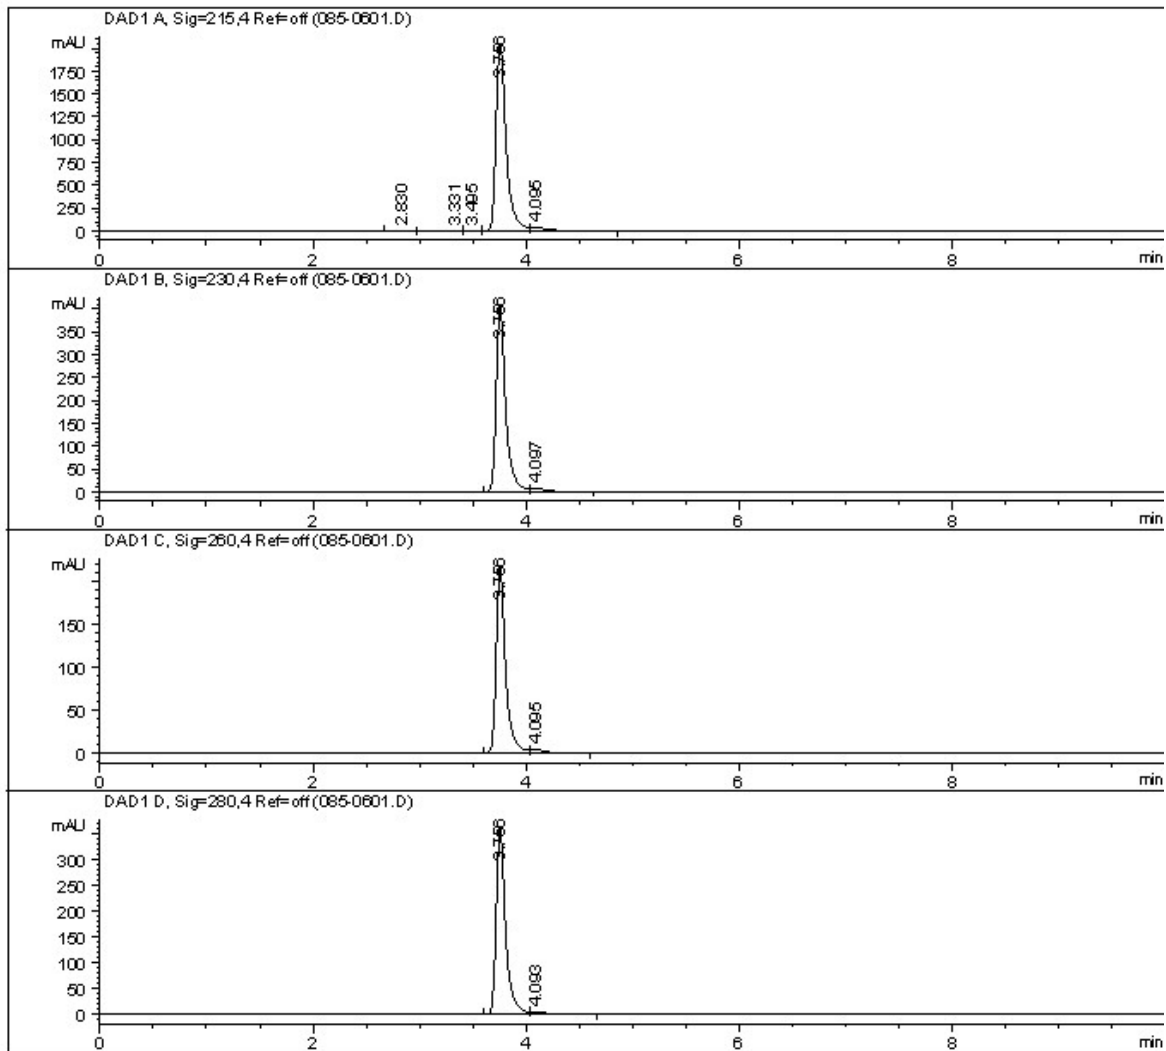

## Area Percent Report with Performance

```
=====
Multiplier:      :      1.0000
Dilution:        :      1.0000
Use Multiplier & Dilution Factor with ISTDs
=====
```

Data File C:\CHEM32\1\DATA\UMAIR\UMAIR 2024-02-13 14-56-21\085-0601.D  
Sample Name: UK-GACL-2

Signal 1: DAD1 A, Sig=215,4 Ref=off

| RetTime<br>[min] | k' | Area<br>[mAU*s] | Height<br>[mAU] | Symm. | Width<br>[min] | Plates | Resol<br>ution | Select<br>ivity |
|------------------|----|-----------------|-----------------|-------|----------------|--------|----------------|-----------------|
| 2.830            | -  | 16.91151        | 2.55702         | 0.81  | 0.0950         | 4928   | -              | -               |
| 3.331            | -  | 48.86526        | 2.40011         | 4.06  | 0.3520         | 497    | 1.32           | 1.18            |
| 3.495            | -  | 23.30044        | 2.38794         | 0.93  | -              | -      | -              | 1.05            |
| 3.756            | -  | 1.35003e4       | 2047.88220      | 0.61  | 0.0946         | 8714   | -              | 1.07            |
| 4.095            | -  | 400.53870       | 42.69287        | 0.44  | 0.1251         | 5931   | 1.81           | 1.09            |

Signal 2: DAD1 B, Sig=230,4 Ref=off

| RetTime<br>[min] | k' | Area<br>[mAU*s] | Height<br>[mAU] | Symm. | Width<br>[min] | Plates | Resol<br>ution | Select<br>ivity |
|------------------|----|-----------------|-----------------|-------|----------------|--------|----------------|-----------------|
| 3.756            | -  | 2491.60254      | 407.10132       | 0.62  | 0.0872         | 10265  | -              | -               |
| 4.097            | -  | 67.26482        | 7.98565         | 0.55  | 0.1269         | 5779   | 1.87           | 1.09            |

Signal 3: DAD1 C, Sig=260,4 Ref=off

| RetTime<br>[min] | k' | Area<br>[mAU*s] | Height<br>[mAU] | Symm. | Width<br>[min] | Plates | Resol<br>ution | Select<br>ivity |
|------------------|----|-----------------|-----------------|-------|----------------|--------|----------------|-----------------|
| 3.756            | -  | 1316.99841      | 217.63165       | 0.63  | 0.0860         | 10552  | -              | -               |
| 4.095            | -  | 29.52357        | 3.45678         | 0.50  | 0.1225         | 6186   | 1.91           | 1.09            |

Signal 4: DAD1 D, Sig=280,4 Ref=off

| RetTime<br>[min] | k' | Area<br>[mAU*s] | Height<br>[mAU] | Symm. | Width<br>[min] | Plates | Resol<br>ution | Select<br>ivity |
|------------------|----|-----------------|-----------------|-------|----------------|--------|----------------|-----------------|
| 3.756            | -  | 2188.78882      | 361.14264       | 0.63  | 0.0862         | 10500  | -              | -               |
| 4.093            | -  | 42.85130        | 4.84483         | 0.42  | 0.1204         | 6406   | 1.92           | 1.09            |

=====  
\*\*\* End of Report \*\*\*

# UPLC chromatogram of compound 7a

Data File C:\CHEM32\1\DATA\UMAIR\UMAIR 2024-02-13 14-56-21\082-0301.D  
Sample Name: UK-GALBR

```
=====
Acq. Operator   : junaid                      Seq. Line :    3
Acq. Instrument : UPLC 1                      Location  : Vial 82
Injection Date  : 13/02/2024 3:31:42 pm      Inj       :    1
                                           Inj Volume: 5.000 µl
Sequence File   : C:\Chem32\1\DATA\UMAIR\UMAIR 2024-02-13 14-56-21\UMAIR.S
Method          : C:\CHEM32\1\DATA\UMAIR\UMAIR 2024-02-13 14-56-21\UMAIR.M (Sequence
                  Method)
Last changed    : 13/02/2024 2:56:19 pm by junaid
Method Info     : column: C-4 (4.6 X 250mm) 5 µm 300A MN
=====
```

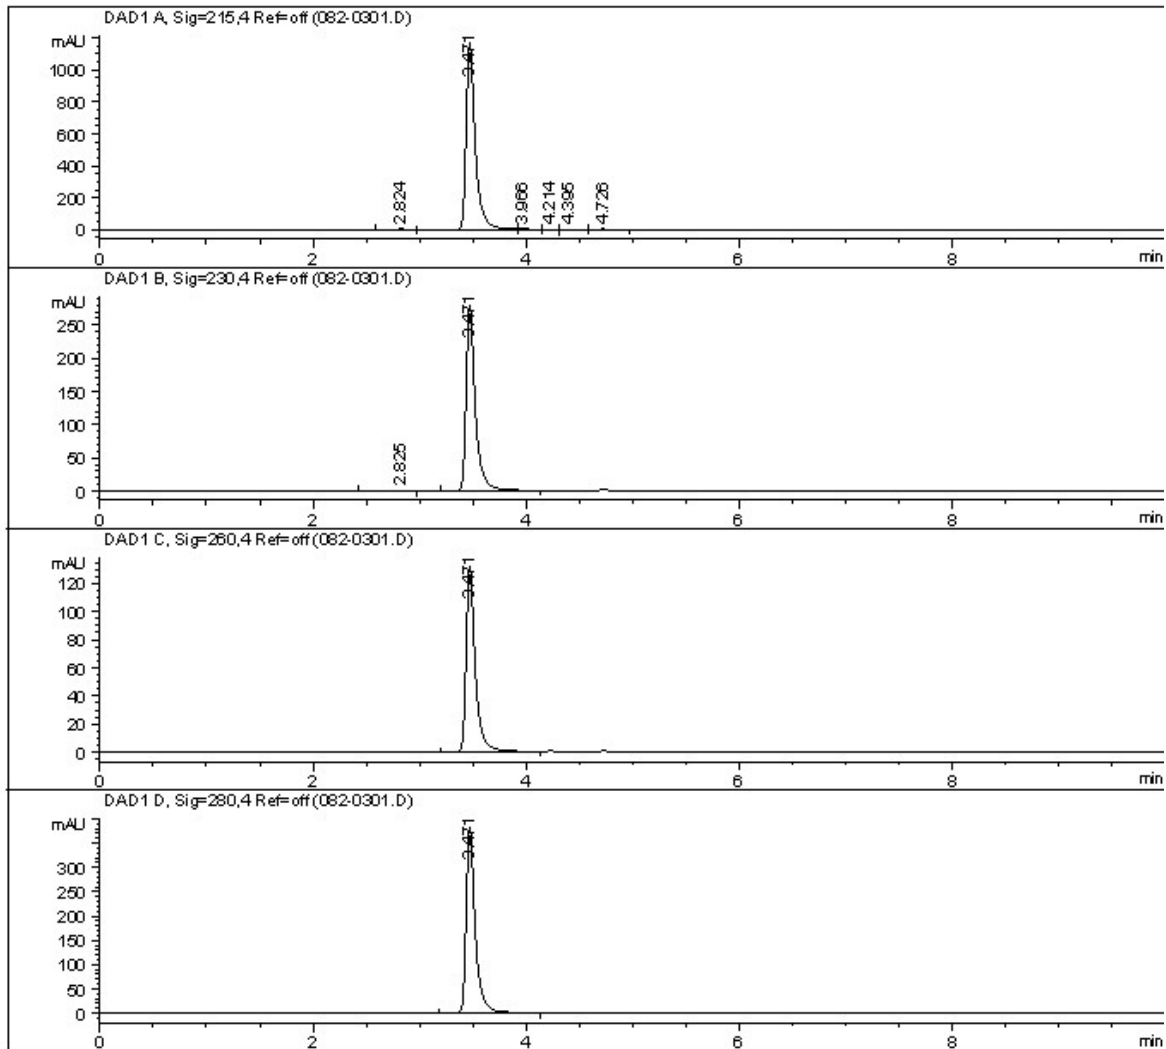

## Area Percent Report with Performance

```
=====
Multiplier:      :      1.0000
Dilution:        :      1.0000
Use Multiplier & Dilution Factor with ISTDs
=====
```

Signal 1: DAD1 A, Sig=215,4 Ref=off

| RetTime<br>[min] | k' | Area<br>[mAU*s] | Height<br>[mAU] | Symm. | Width<br>[min] | Plates | Resol<br>ution | Select<br>ivity |
|------------------|----|-----------------|-----------------|-------|----------------|--------|----------------|-----------------|
| 2.824            | -  | 30.33011        | 4.30497         | 0.88  | 0.1000         | 4426   | -              | -               |
| 3.471            | -  | 7008.73242      | 1169.25415      | 0.57  | 0.0836         | 9564   | 4.14           | 1.23            |
| 3.966            | -  | 35.88287        | 4.02049         | 0.33  | 0.1546         | 3648   | 2.45           | 1.14            |
| 4.214            | -  | 14.61916        | 1.82261         | 0.83  | -              | -      | -              | 1.06            |
| 4.395            | -  | 8.54136         | 1.04321         | 1.00  | 0.1440         | 5157   | -              | 1.04            |
| 4.726            | -  | 20.46066        | 2.68093         | 0.81  | 0.1167         | 9093   | 1.49           | 1.08            |

Signal 2: DAD1 B, Sig=230,4 Ref=off

| RetTime<br>[min] | k' | Area<br>[mAU*s] | Height<br>[mAU] | Symm. | Width<br>[min] | Plates | Resol<br>ution | Select<br>ivity |
|------------------|----|-----------------|-----------------|-------|----------------|--------|----------------|-----------------|
| 2.825            | -  | 7.67525         | 1.04858         | 0.97  | 0.1963         | 1149   | -              | -               |
| 3.471            | -  | 1663.11353      | 280.86484       | 0.56  | 0.0831         | 9668   | 2.71           | 1.23            |

Signal 3: DAD1 C, Sig=260,4 Ref=off

| RetTime<br>[min] | k' | Area<br>[mAU*s] | Height<br>[mAU] | Symm. | Width<br>[min] | Plates | Resol<br>ution | Select<br>ivity |
|------------------|----|-----------------|-----------------|-------|----------------|--------|----------------|-----------------|
| 3.471            | -  | 778.96527       | 132.36870       | 0.57  | 0.0829         | 9725   | -              | -               |

Signal 4: DAD1 D, Sig=280,4 Ref=off

| RetTime<br>[min] | k' | Area<br>[mAU*s] | Height<br>[mAU] | Symm. | Width<br>[min] | Plates | Resol<br>ution | Select<br>ivity |
|------------------|----|-----------------|-----------------|-------|----------------|--------|----------------|-----------------|
| 3.471            | -  | 2252.70557      | 383.80142       | 0.57  | 0.0826         | 9799   | -              | -               |

=====  
\*\*\* End of Report \*\*\*
